# Supplementary material
Source: MDPI journal article supplement (https://www.mdpi.com/2072-4292/14/21/5441)
Supplement: s1 [file s1]

## Supplementary material from

# High-resolution drone images show that the distribution of mussels depends on microhabitat features of intertidal rocky shores

Romina Vanessa Barbosa<sup>1\*</sup>, Marion Jaud<sup>2,3</sup>, Cedric Bacher<sup>4</sup>, Yann Kerjean<sup>1</sup>, Fred Jean<sup>1</sup>, Jérôme Ammann<sup>2</sup>, Yoann Thomas<sup>1</sup>

<sup>1</sup> Univ Brest, CNRS, IRD, Ifremer, LEMAR, F-29280 Plouzané, France

<sup>2</sup> European Institute for Marine Studies (IUEM), Univ Brest, CNRS—UAR 3113, F-29280 Plouzané, France

<sup>3</sup> University of Bretagne Occidentale, CNRS, UMR Geo-Ocean, IUEM, rue Dumont d'Urville, Plouzané, France

<sup>4</sup> Ifremer, DYNECO, Centre Ifremer de Brest, Plouzané, France

\* Correspondence: rominavanessa.barbosa@gmail.com

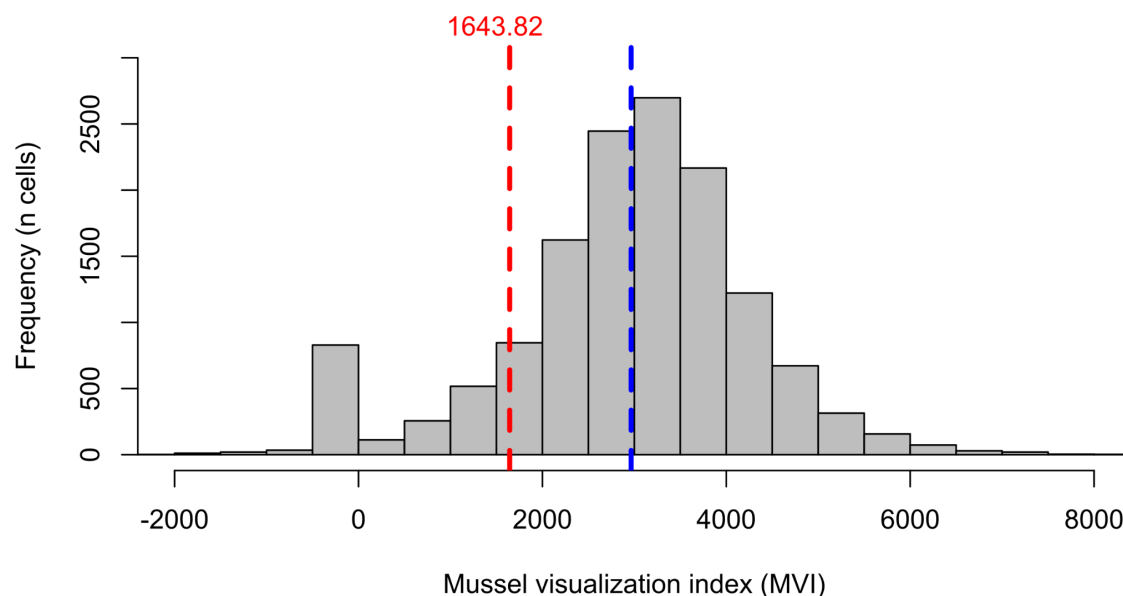

**Figure S1.** Frequency distribution of cells classified as potential mussels' coverage in the orthomosaic based on 60 virtual quadrat training samplings (10 x 10 cm) from both rocky shores. The discontinuous blue and red lines indicate the mean and the lower confidence interval of 68%, which was selected to determine the threshold MVI for mapping mussels' distribution.

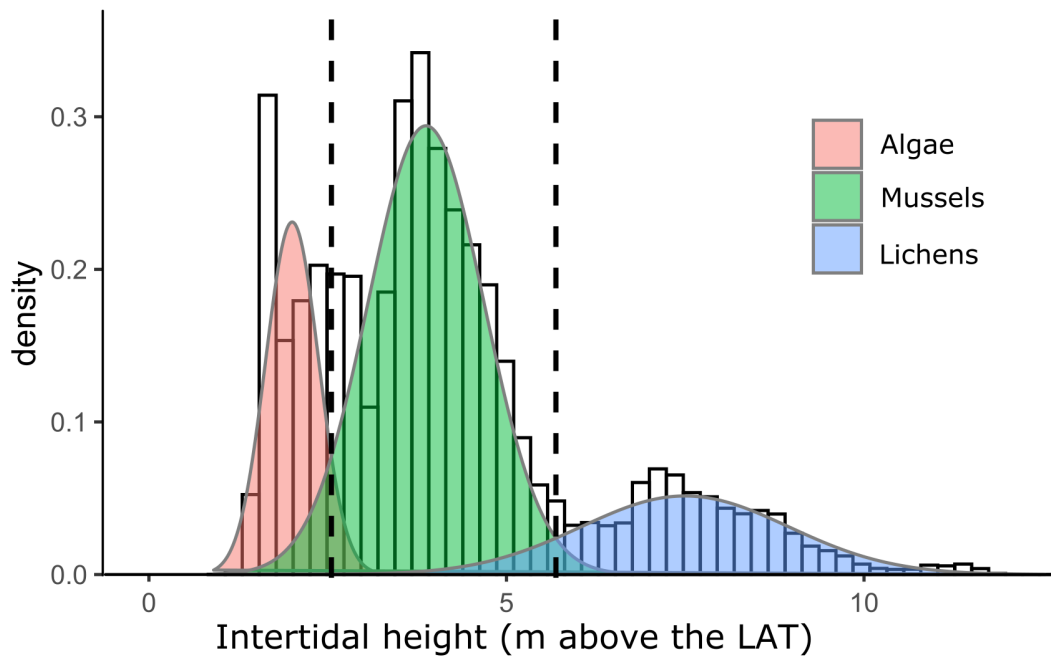

**Figure S2.** Density distribution of the cells with mussel's MVI values along the intertidal height gradient. Continuous grey lines represent Gaussian curves calculated for each of the three groups identified. These three groups were distributed in the low, mid, and high intertidal, which corresponded to algae, mussels, and lichens distribution, respectively. Discontinuous black lines indicate the lower and upper limit of height distribution of mussels, 2.55 and 5.70 m above the LAT, determined based on the interceptions between the Gaussian distributions. LAT: Lowest Astronomic Tide.
