# Supplementary material
Source: MDPI journal article supplement (https://www.mdpi.com/2072-4292/14/21/5441)
Supplement: s1 [file s1]

Archive with 3 entries (3 files):
- Barbosa_et_al_Supplementary_material.pdf
- Table S1_conditions_Available_area_20x20cm_res.csv
- Table S2_conditions_Mussel_distrib_area_1x1cm_res.csv
