# Supplementary material
Source: MDPI journal article supplement (https://www.mdpi.com/2072-4292/14/21/5441)
Supplement: s1 [file s1 › Table S1_conditions_Available_area_20x20cm_res.csv]

	Rocky_shore	Longitude	Latitude	Intertidal_height_(m_above_the_LAT)	Slope_angle_degree	Orientation_angle_degree	Intertidal_height_group	Slope_group	Orientation_group
157691	West	-4.61695445102548	48.3392351841234	7.9644306957998	18.1438549241003	205.929152480377	(7.8,8]	(10,20]	(200,210]
159471	West	-4.61695983102548	48.3392333941234	7.9962309255744	20.0605417565369	139.496306157192	(7.8,8]	(20,30]	(130,140]
159472	West	-4.61695714102548	48.3392333941234	7.92691724689255	21.7120533841618	141.749342266293	(7.8,8]	(20,30]	(140,150]
159473	West	-4.61695445102548	48.3392333941234	7.88323367543536	23.8876009969709	189.891181054788	(7.8,8]	(20,30]	(180,190]
159474	West	-4.61695176102548	48.3392333941234	7.99615414389019	33.9841737129872	206.28024648943	(7.8,8]	(30,40]	(200,210]
159690	West	-4.61637072102548	48.3392333941234	7.98366487512359	40.9310057171944	189.268750703065	(7.8,8]	(40,50]	(180,190]
159697	West	-4.61635189102548	48.3392333941234	7.98221670389696	63.6868941581877	180.437617618318	(7.8,8]	(60,70]	(180,190]
161252	West	-4.61696252102548	48.3392316041234	7.96198641211407	24.8596027092904	146.756050271085	(7.8,8]	(20,30]	(140,150]
161253	West	-4.61695983102548	48.3392316041234	7.91038073816243	25.1933689112335	149.248176474513	(7.8,8]	(20,30]	(140,150]
161254	West	-4.61695714102548	48.3392316041234	7.86921223823853	25.1750199152879	145.943005221745	(7.8,8]	(20,30]	(140,150]
161255	West	-4.61695445102548	48.3392316041234	7.80923006055579	27.8264242449106	163.830449512251	(7.8,8]	(20,30]	(160,170]
161256	West	-4.61695176102548	48.3392316041234	7.78056513388664	36.0422399980483	191.938305149674	(7.6,7.8]	(30,40]	(190,200]
161257	West	-4.61694907102548	48.3392316041234	7.82600635009658	36.1729481277538	211.51366394275	(7.8,8]	(30,40]	(210,220]
161258	West	-4.61694638102548	48.3392316041234	7.8979027923041	52.173262110775	261.686420957433	(7.8,8]	(50,60]	(260,270]
161471	West	-4.61637341102548	48.3392316041234	7.8950174759099	43.8528323205065	126.291775155534	(7.8,8]	(40,50]	(120,130]
161472	West	-4.61637072102548	48.3392316041234	7.87402241153437	30.9242547318672	179.894209188464	(7.8,8]	(30,40]	(170,180]
161473	West	-4.61636803102548	48.3392316041234	7.89061277558643	39.3298487866541	202.143049298972	(7.8,8]	(30,40]	(200,210]
161474	West	-4.61636534102548	48.3392316041234	7.96500424302937	44.2612816525243	202.925271123021	(7.8,8]	(40,50]	(200,210]
161478	West	-4.61635458102548	48.3392316041234	7.84073400875815	39.1263064691722	159.220395303751	(7.8,8]	(30,40]	(150,160]
161479	West	-4.61635189102548	48.3392316041234	7.78417026235143	28.7454270547685	230.64040656031	(7.6,7.8]	(20,30]	(230,240]
161480	West	-4.61634920102548	48.3392316041234	7.95569343512467	48.1739284702365	268.299458295351	(7.8,8]	(40,50]	(260,270]
162964	West	-4.61715082102548	48.3392298141234	7.50914058928304	54.6414470228227	358.464431186459	(7.4,7.6]	(50,60]	(350,360]
162965	West	-4.61714813102548	48.3392298141234	7.52666730146379	57.0117687890106	354.793159997638	(7.4,7.6]	(50,60]	(350,360]
162966	West	-4.61714544102548	48.3392298141234	7.56357998180848	57.8051763959066	351.240631298835	(7.4,7.6]	(50,60]	(350,360]
162967	West	-4.61714275102548	48.3392298141234	7.6195839241294	56.4113100386155	348.553526257611	(7.6,7.8]	(50,60]	(340,350]
162968	West	-4.61714006102548	48.3392298141234	7.67665097386242	52.795590081708	350.434844528411	(7.6,7.8]	(50,60]	(350,360]
162969	West	-4.61713737102548	48.3392298141234	7.70221106494884	48.1622912818308	354.860951682746	(7.6,7.8]	(40,50]	(350,360]
163032	West	-4.61696790102548	48.3392298141234	7.97021541759618	26.9175396259208	156.472870822827	(7.8,8]	(20,30]	(150,160]
163033	West	-4.61696521102548	48.3392298141234	7.9307146078844	27.3607470428716	152.99920060289	(7.8,8]	(20,30]	(150,160]
163034	West	-4.61696252102548	48.3392298141234	7.87556184722009	26.3167031304245	148.604672039723	(7.8,8]	(20,30]	(140,150]
163035	West	-4.61695983102548	48.3392298141234	7.82625658316716	25.2501463420812	149.635975951335	(7.8,8]	(20,30]	(140,150]
163036	West	-4.61695714102548	48.3392298141234	7.78402146714602	26.7852040744065	147.660896728386	(7.6,7.8]	(20,30]	(140,150]
163037	West	-4.61695445102548	48.3392298141234	7.72239474000593	28.7121099253824	147.651681774977	(7.6,7.8]	(20,30]	(140,150]
163038	West	-4.61695176102548	48.3392298141234	7.65801159599112	26.7683646722381	186.173516226113	(7.6,7.8]	(20,30]	(180,190]
163039	West	-4.61694907102548	48.3392298141234	7.7608034306002	38.6469641734492	244.314287386747	(7.6,7.8]	(30,40]	(240,250]
163040	West	-4.61694638102548	48.3392298141234	7.97977542479716	61.2281151241565	273.257884296302	(7.8,8]	(60,70]	(270,280]
163253	West	-4.61637341102548	48.3392298141234	7.79376734682422	43.7613744806883	137.69637153954	(7.6,7.8]	(40,50]	(130,140]
163254	West	-4.61637072102548	48.3392298141234	7.76956503431521	28.5904068731085	180.129188815842	(7.6,7.8]	(20,30]	(180,190]
163255	West	-4.61636803102548	48.3392298141234	7.77462566923915	28.9694287241209	197.181125285001	(7.6,7.8]	(20,30]	(190,200]
163256	West	-4.61636534102548	48.3392298141234	7.82057280377242	34.0438799470398	208.542550147237	(7.8,8]	(30,40]	(200,210]
163257	West	-4.61636265102548	48.3392298141234	7.91469451295352	35.8333246985141	192.734384233882	(7.8,8]	(30,40]	(190,200]
163258	West	-4.61635996102548	48.3392298141234	7.88958369417318	40.4924910017613	163.076783330774	(7.8,8]	(40,50]	(160,170]
163259	West	-4.61635727102548	48.3392298141234	7.80413143859722	44.3984033669299	150.732629735409	(7.8,8]	(40,50]	(150,160]
163260	West	-4.61635458102548	48.3392298141234	7.72766136044587	28.5038969586178	199.186187051946	(7.6,7.8]	(20,30]	(190,200]
163261	West	-4.61635189102548	48.3392298141234	7.9032684090529	45.8441474590754	277.998886405185	(7.8,8]	(40,50]	(270,280]
163273	West	-4.61631961102548	48.3392298141234	7.96993027815134	53.3397720607114	103.642104198446	(7.8,8]	(50,60]	(100,110]
164744	West	-4.61715620102548	48.3392280241234	7.8155467251923	51.7409959459119	59.865612947238	(7.8,8]	(50,60]	(50,60]
164745	West	-4.61715351102548	48.3392280241234	7.76608220439	52.7145206373087	357.510212741974	(7.6,7.8]	(50,60]	(350,360]
164746	West	-4.61715082102548	48.3392280241234	7.79043010852962	56.3772164164323	352.047552406458	(7.6,7.8]	(50,60]	(350,360]
164747	West	-4.61714813102548	48.3392280241234	7.84298104310504	58.9922000395966	351.39237075455	(7.8,8]	(50,60]	(350,360]
164748	West	-4.61714544102548	48.3392280241234	7.8891007212067	59.8428851331492	352.368910261599	(7.8,8]	(50,60]	(350,360]
164749	West	-4.61714275102548	48.3392280241234	7.92900609093346	59.1651807467891	353.876499255844	(7.8,8]	(50,60]	(350,360]
164750	West	-4.61714006102548	48.3392280241234	7.95320844948616	56.9997819818207	358.601510831346	(7.8,8]	(50,60]	(350,360]
164751	West	-4.61713737102548	48.3392280241234	7.94135301775894	53.176279007812	4.78239162886157	(7.8,8]	(50,60]	(0,10]
164812	West	-4.61697328102548	48.3392280241234	7.95969483962738	28.362738830881	149.818085101646	(7.8,8]	(20,30]	(140,150]
164813	West	-4.61697059102548	48.3392280241234	7.90239224239096	28.6232794151164	155.246645473236	(7.8,8]	(20,30]	(150,160]
164814	West	-4.61696790102548	48.3392280241234	7.88255297471445	26.7651483831073	157.680902404541	(7.8,8]	(20,30]	(150,160]
164815	West	-4.61696521102548	48.3392280241234	7.83543574862599	25.3714315830117	154.576421967715	(7.8,8]	(20,30]	(150,160]
164816	West	-4.61696252102548	48.3392280241234	7.80337059972538	25.3130937333244	150.421957150852	(7.8,8]	(20,30]	(150,160]
164817	West	-4.61695983102548	48.3392280241234	7.75232202220854	25.9707721080877	148.766879937877	(7.6,7.8]	(20,30]	(140,150]
164818	West	-4.61695714102548	48.3392280241234	7.69958655716347	27.400967910408	146.108597247314	(7.6,7.8]	(20,30]	(140,150]
164819	West	-4.61695445102548	48.3392280241234	7.6311872550847	28.373715352465	144.056603020798	(7.6,7.8]	(20,30]	(140,150]
164820	West	-4.61695176102548	48.3392280241234	7.57354307731534	23.9958332508307	184.256577184211	(7.4,7.6]	(20,30]	(180,190]
164821	West	-4.61694907102548	48.3392280241234	7.62397760285531	47.4274598725215	254.569625542363	(7.6,7.8]	(40,50]	(250,260]
164822	West	-4.61694638102548	48.3392280241234	7.9601864267447	66.3255981805487	271.393092432859	(7.8,8]	(60,70]	(270,280]
165034	West	-4.61637610102548	48.3392280241234	7.79670247587881	56.2134571871432	129.070388603096	(7.6,7.8]	(50,60]	(120,130]
165035	West	-4.61637341102548	48.3392280241234	7.65166701739777	40.7271102818539	151.380972390591	(7.6,7.8]	(40,50]	(150,160]
165036	West	-4.61637072102548	48.3392280241234	7.66136583210635	32.1741083731851	185.494440671764	(7.6,7.8]	(30,40]	(180,190]
165037	West	-4.61636803102548	48.3392280241234	7.69631189069378	31.0753626879953	196.146320494556	(7.6,7.8]	(30,40]	(190,200]
165038	West	-4.61636534102548	48.3392280241234	7.72877840013181	33.0700996609711	199.854223864476	(7.6,7.8]	(30,40]	(190,200]
165039	West	-4.61636265102548	48.3392280241234	7.77391034165605	36.418826043056	182.057596217085	(7.6,7.8]	(30,40]	(180,190]
165040	West	-4.61635996102548	48.3392280241234	7.73811498556336	43.5695127457459	157.292674588696	(7.6,7.8]	(40,50]	(150,160]
165041	West	-4.61635727102548	48.3392280241234	7.64587330031602	42.4934693101725	156.752697660589	(7.6,7.8]	(40,50]	(150,160]
165042	West	-4.61635458102548	48.3392280241234	7.53002029146034	41.9095343104131	237.237748838819	(7.4,7.6]	(40,50]	(230,240]
165043	West	-4.61635189102548	48.3392280241234	7.94792761116447	53.8952992124052	260.41109715572	(7.8,8]	(50,60]	(260,270]
165055	West	-4.61631961102548	48.3392280241234	7.84976828683939	58.6994417415908	129.600950151036	(7.8,8]	(50,60]	(120,130]
165056	West	-4.61631692102548	48.3392280241234	7.61721701617473	47.6536413278959	134.135943661231	(7.6,7.8]	(40,50]	(130,140]
166526	West	-4.61715620102548	48.3392262341234	7.97177516177719	29.3328314081044	2.63000521642669	(7.8,8]	(20,30]	(0,10]
166593	West	-4.61697597102548	48.3392262341234	7.94354355078185	29.845685883838	167.04069014848	(7.8,8]	(20,30]	(160,170]
166594	West	-4.61697328102548	48.3392262341234	7.88856192359069	32.1593937281859	150.159286910544	(7.8,8]	(30,40]	(150,160]
166595	West	-4.61697059102548	48.3392262341234	7.82891554341099	31.7125813035621	157.164756145524	(7.8,8]	(30,40]	(150,160]
166596	West	-4.61696790102548	48.3392262341234	7.78816182586084	28.9507307975655	167.289779064518	(7.6,7.8]	(20,30]	(160,170]
166597	West	-4.61696521102548	48.3392262341234	7.76193867388182	25.0893128280384	162.306171507715	(7.6,7.8]	(20,30]	(160,170]
166598	West	-4.61696252102548	48.3392262341234	7.71698767536071	25.3055384893908	149.547197777438	(7.6,7.8]	(20,30]	(140,150]
166599	West	-4.61695983102548	48.3392262341234	7.66085380109176	26.605787501988	147.73432210909	(7.6,7.8]	(20,30]	(140,150]
166600	West	-4.61695714102548	48.3392262341234	7.61390037003168	27.7780660182482	145.492182067341	(7.6,7.8]	(20,30]	(140,150]
166601	West	-4.61695445102548	48.3392262341234	7.54669463374554	27.9229237866033	144.169528088919	(7.4,7.6]	(20,30]	(140,150]
166602	West	-4.61695176102548	48.3392262341234	7.48715282343229	21.0306395357198	190.674149505926	(7.4,7.6]	(20,30]	(190,200]
166603	West	-4.61694907102548	48.3392262341234	7.57531763653414	54.9855270123944	265.239763170484	(7.4,7.6]	(50,60]	(260,270]
166663	West	-4.61678767102548	48.3392262341234	7.9662918041976	49.0324139547734	164.301915799218	(7.8,8]	(40,50]	(160,170]
166664	West	-4.61678498102548	48.3392262341234	7.92381813117315	43.705264788054	151.468477809589	(7.8,8]	(40,50]	(150,160]
166815	West	-4.61637879102548	48.3392262341234	7.87140412677494	61.7544309697506	131.503831581737	(7.8,8]	(60,70]	(130,140]
166816	West	-4.61637610102548	48.3392262341234	7.62830348009523	54.6405550602674	140.581305175718	(7.6,7.8]	(50,60]	(140,150]
166817	West	-4.61637341102548	48.3392262341234	7.52968034037868	41.4705575945562	163.406922175121	(7.4,7.6]	(40,50]	(160,170]
166818	West	-4.61637072102548	48.3392262341234	7.51541569605474	38.5723626111867	185.94193226851	(7.4,7.6]	(30,40]	(180,190]
166819	West	-4.61636803102548	48.3392262341234	7.55545204284086	38.7038048166758	195.416732138475	(7.4,7.6]	(30,40]	(190,200]
166820	West	-4.61636534102548	48.3392262341234	7.59645647556823	38.3381058885095	189.88251758134	(7.4,7.6]	(30,40]	(180,190]
166821	West	-4.61636265102548	48.3392262341234	7.61234247816182	43.2350227787794	170.264876713817	(7.6,7.8]	(40,50]	(170,180]
166822	West	-4.61635996102548	48.3392262341234	7.55095345155965	51.1022224823434	155.247538286909	(7.4,7.6]	(50,60]	(150,160]
166823	West	-4.61635727102548	48.3392262341234	7.39422854522738	46.3935668687189	174.821303978055	(7.2,7.4]	(40,50]	(170,180]
166824	West	-4.61635458102548	48.3392262341234	7.55326414425956	53.6290267314992	235.842627658111	(7.4,7.6]	(50,60]	(230,240]
166825	West	-4.61635189102548	48.3392262341234	7.89287700909774	55.2982721599809	236.455586376933	(7.8,8]	(50,60]	(230,240]
166826	West	-4.61634920102548	48.3392262341234	7.99784787889199	47.3473572044359	193.434490835169	(7.8,8]	(40,50]	(190,200]
166827	West	-4.61634651102548	48.3392262341234	7.94789061602282	48.5913097289061	177.734216987503	(7.8,8]	(40,50]	(170,180]
166828	West	-4.61634382102548	48.3392262341234	7.943358581002	47.4416956817526	191.449836932219	(7.8,8]	(40,50]	(190,200]
166836	West	-4.61632230102548	48.3392262341234	7.79411185369669	65.8287693004743	146.465205965967	(7.6,7.8]	(60,70]	(140,150]
166837	West	-4.61631961102548	48.3392262341234	7.50482782286388	60.9585596439176	149.081497186983	(7.4,7.6]	(60,70]	(140,150]
166838	West	-4.61631692102548	48.3392262341234	7.4598407712794	50.5245266007235	158.918037083207	(7.4,7.6]	(50,60]	(150,160]
166839	West	-4.61631423102548	48.3392262341234	7.3769451874706	48.8608403211928	149.160085641665	(7.2,7.4]	(40,50]	(140,150]
168304	West	-4.61716696102548	48.3392244441234	6.22617136591616	75.61972789796	150.477103858983	(6.2,6.4]	(70,80]	(150,160]
168305	West	-4.61716427102548	48.3392244441234	7.34328203014491	74.7033918176015	220.533771482448	(7.2,7.4]	(70,80]	(220,230]
168306	West	-4.61716158102548	48.3392244441234	7.74120636505224	60.9974160646123	231.849506220187	(7.6,7.8]	(60,70]	(230,240]
168307	West	-4.61715889102548	48.3392244441234	7.93685133880484	40.4679329495601	280.788592896138	(7.8,8]	(40,50]	(280,290]
168375	West	-4.61697597102548	48.3392244441234	7.81375177203573	34.0847987132818	168.774494231443	(7.8,8]	(30,40]	(160,170]
168376	West	-4.61697328102548	48.3392244441234	7.75101972992706	35.8059900288746	156.119363752114	(7.6,7.8]	(30,40]	(150,160]
168377	West	-4.61697059102548	48.3392244441234	7.67358657791213	34.428120253704	157.752086274094	(7.6,7.8]	(30,40]	(150,160]
168378	West	-4.61696790102548	48.3392244441234	7.64710092587392	31.9478915444036	174.589028197968	(7.6,7.8]	(30,40]	(170,180]
168379	West	-4.61696521102548	48.3392244441234	7.68068289580446	28.9757795512468	175.468475312536	(7.6,7.8]	(20,30]	(170,180]
168380	West	-4.61696252102548	48.3392244441234	7.64202972257882	27.6044607495133	154.895457351332	(7.6,7.8]	(20,30]	(150,160]
168381	West	-4.61695983102548	48.3392244441234	7.58436949380876	28.0366181696395	148.22736019613	(7.4,7.6]	(20,30]	(140,150]
168382	West	-4.61695714102548	48.3392244441234	7.5261850532073	28.8152619581852	146.634490406121	(7.4,7.6]	(20,30]	(140,150]
168383	West	-4.61695445102548	48.3392244441234	7.45862827991117	26.6083396292342	147.843043293738	(7.4,7.6]	(20,30]	(140,150]
168384	West	-4.61695176102548	48.3392244441234	7.41168628366319	19.5724087943241	227.798656585193	(7.4,7.6]	(10,20]	(220,230]
168385	West	-4.61694907102548	48.3392244441234	7.52199329712192	59.9212912568397	270.029494868351	(7.4,7.6]	(50,60]	(270,280]
168439	West	-4.61680381102548	48.3392244441234	7.9647216505577	46.5773596858302	161.859338143521	(7.8,8]	(40,50]	(160,170]
168442	West	-4.61679574102548	48.3392244441234	7.9497773321466	46.8649877140941	155.154682754172	(7.8,8]	(40,50]	(150,160]
168443	West	-4.61679305102548	48.3392244441234	7.83724519425642	44.8829697871462	159.742158728499	(7.8,8]	(40,50]	(150,160]
168444	West	-4.61679036102548	48.3392244441234	7.80510211810517	40.843192930565	168.735340570219	(7.8,8]	(40,50]	(160,170]
168445	West	-4.61678767102548	48.3392244441234	7.77345530442239	37.0663620333153	169.1094035484	(7.6,7.8]	(30,40]	(160,170]
168446	West	-4.61678498102548	48.3392244441234	7.75338667547583	36.157004666711	156.779816097237	(7.6,7.8]	(30,40]	(150,160]
168447	West	-4.61678229102548	48.3392244441234	7.62972489751438	35.3900508529014	132.960691465501	(7.6,7.8]	(30,40]	(130,140]
168451	West	-4.61677153102548	48.3392244441234	7.16392277866981	30.8196808489946	147.180963048148	(7,7.2]	(30,40]	(140,150]
168452	West	-4.61676884102548	48.3392244441234	7.11604110561299	35.9253150675347	170.031846736064	(7,7.2]	(30,40]	(170,180]
168453	West	-4.61676615102548	48.3392244441234	7.11023327548199	39.5907710278204	194.793635076889	(7,7.2]	(30,40]	(190,200]
168454	West	-4.61676346102548	48.3392244441234	7.18319332585162	45.5570112547833	220.014045834641	(7,7.2]	(40,50]	(220,230]
168477	West	-4.61670159102548	48.3392244441234	7.97586339705618	19.6402200302725	170.198829695587	(7.8,8]	(10,20]	(170,180]
168478	West	-4.61669890102548	48.3392244441234	7.96995917133583	36.9516951446708	295.781470605555	(7.8,8]	(30,40]	(290,300]
168596	West	-4.61638148102548	48.3392244441234	7.96658759352367	61.74961855697	129.991420073417	(7.8,8]	(60,70]	(120,130]
168597	West	-4.61637879102548	48.3392244441234	7.57872346896692	63.124048414006	133.035212273572	(7.4,7.6]	(60,70]	(130,140]
168598	West	-4.61637610102548	48.3392244441234	7.37847736652415	54.235683347263	154.128780208677	(7.2,7.4]	(50,60]	(150,160]
168599	West	-4.61637341102548	48.3392244441234	7.35203776566058	46.5971323880053	174.293279471916	(7.2,7.4]	(40,50]	(170,180]
168600	West	-4.61637072102548	48.3392244441234	7.33768142723597	42.9695194447723	187.148252067066	(7.2,7.4]	(40,50]	(180,190]
168601	West	-4.61636803102548	48.3392244441234	7.38731402774724	41.8102515567213	197.716815224353	(7.2,7.4]	(40,50]	(190,200]
168602	West	-4.61636534102548	48.3392244441234	7.44737617748333	40.5988262824601	184.519309248948	(7.4,7.6]	(40,50]	(180,190]
168603	West	-4.61636265102548	48.3392244441234	7.4120700204776	45.704249787634	160.215781822771	(7.4,7.6]	(40,50]	(160,170]
168604	West	-4.61635996102548	48.3392244441234	7.27587972789571	47.2288291683081	151.553172667974	(7.2,7.4]	(40,50]	(150,160]
168605	West	-4.61635727102548	48.3392244441234	7.14997558409613	36.2837635523956	198.577015564385	(7,7.2]	(30,40]	(190,200]
168606	West	-4.61635458102548	48.3392244441234	7.32845196197013	52.527838789867	241.152015945533	(7.2,7.4]	(50,60]	(240,250]
168607	West	-4.61635189102548	48.3392244441234	7.63981552637868	51.5653959592553	222.38770299882	(7.6,7.8]	(50,60]	(220,230]
168608	West	-4.61634920102548	48.3392244441234	7.72007407619149	48.6418142053542	187.926773252519	(7.6,7.8]	(40,50]	(180,190]
168609	West	-4.61634651102548	48.3392244441234	7.70358192183704	45.8397603106034	183.961280975451	(7.6,7.8]	(40,50]	(180,190]
168610	West	-4.61634382102548	48.3392244441234	7.75972072779668	43.4933280758388	197.682122258262	(7.6,7.8]	(40,50]	(190,200]
168611	West	-4.61634113102548	48.3392244441234	7.84425502856238	44.9242958147806	195.857342620133	(7.8,8]	(40,50]	(190,200]
168612	West	-4.61633844102548	48.3392244441234	7.88483058721907	49.1904803504825	180.637774375304	(7.8,8]	(40,50]	(180,190]
168613	West	-4.61633575102548	48.3392244441234	7.8579362445236	52.7179690266746	167.891326024485	(7.8,8]	(50,60]	(160,170]
168614	West	-4.61633306102548	48.3392244441234	7.78335206072613	56.0086742575269	168.084474519508	(7.6,7.8]	(50,60]	(160,170]
168615	West	-4.61633037102548	48.3392244441234	7.7430170070835	62.4395630217105	171.2180687274	(7.6,7.8]	(60,70]	(170,180]
168616	West	-4.61632768102548	48.3392244441234	7.61870471356794	66.9642750677334	171.056411994401	(7.6,7.8]	(60,70]	(170,180]
168617	West	-4.61632499102548	48.3392244441234	7.57193882210315	67.0583364220945	166.851073115431	(7.4,7.6]	(60,70]	(160,170]
168618	West	-4.61632230102548	48.3392244441234	7.43290299678279	64.3584607837785	154.309142033379	(7.4,7.6]	(60,70]	(150,160]
168619	West	-4.61631961102548	48.3392244441234	7.21335505801743	58.9293374059996	158.415998353094	(7.2,7.4]	(50,60]	(150,160]
168620	West	-4.61631692102548	48.3392244441234	7.22478633467852	56.5412342191921	169.146536540258	(7.2,7.4]	(50,60]	(160,170]
168621	West	-4.61631423102548	48.3392244441234	7.12543221814567	55.0827277374536	161.246133948416	(7,7.2]	(50,60]	(160,170]
168622	West	-4.61631154102548	48.3392244441234	7.01625674125218	42.0265470036166	163.260159542772	(7,7.2]	(40,50]	(160,170]
170085	West	-4.61716965102548	48.3392226541234	7.85963944831197	73.4408719896146	94.3343574993974	(7.8,8]	(70,80]	(90,100]
170086	West	-4.61716696102548	48.3392226541234	6.60182854212036	65.6503510834757	48.2269629346192	(6.6,6.8]	(60,70]	(40,50]
170087	West	-4.61716427102548	48.3392226541234	6.98874434873404	72.0064943919809	298.42997549306	(6.8,7]	(70,80]	(290,300]
170088	West	-4.61716158102548	48.3392226541234	7.69773050811309	68.8173038516694	294.488153908021	(7.6,7.8]	(60,70]	(290,300]
170154	West	-4.61698404102548	48.3392226541234	7.79651419048512	22.1514728601324	145.667888180873	(7.6,7.8]	(20,30]	(140,150]
170155	West	-4.61698135102548	48.3392226541234	7.74058475428037	25.7134125848673	154.390508135508	(7.6,7.8]	(20,30]	(150,160]
170156	West	-4.61697866102548	48.3392226541234	7.69552562507364	30.6543409308753	162.014804758435	(7.6,7.8]	(30,40]	(160,170]
170157	West	-4.61697597102548	48.3392226541234	7.6542821859715	34.8734673097942	164.492831483873	(7.6,7.8]	(30,40]	(160,170]
170158	West	-4.61697328102548	48.3392226541234	7.63331834267168	35.0854473845823	161.171689030417	(7.6,7.8]	(30,40]	(160,170]
170159	West	-4.61697059102548	48.3392226541234	7.58419858443849	33.7552578983813	157.704489699193	(7.4,7.6]	(30,40]	(150,160]
170160	West	-4.61696790102548	48.3392226541234	7.52830318642986	33.5280716683324	172.258111037236	(7.4,7.6]	(30,40]	(170,180]
170161	West	-4.61696521102548	48.3392226541234	7.54334130508225	36.5786158161533	177.732483307905	(7.4,7.6]	(30,40]	(170,180]
170162	West	-4.61696252102548	48.3392226541234	7.5399507798139	37.9998745220597	166.875471985968	(7.4,7.6]	(30,40]	(160,170]
170163	West	-4.61695983102548	48.3392226541234	7.48378635696044	36.7740194811853	160.579659177874	(7.4,7.6]	(30,40]	(160,170]
170164	West	-4.61695714102548	48.3392226541234	7.42821370622328	35.0429210492587	156.493879685327	(7.4,7.6]	(30,40]	(150,160]
170165	West	-4.61695445102548	48.3392226541234	7.36765780743963	32.8836669949551	160.153012852422	(7.2,7.4]	(30,40]	(160,170]
170166	West	-4.61695176102548	48.3392226541234	7.35938879029975	36.5824606666867	241.347560979049	(7.2,7.4]	(30,40]	(240,250]
170167	West	-4.61694907102548	48.3392226541234	7.63171236494454	62.1337648145298	268.782980003164	(7.6,7.8]	(60,70]	(260,270]
170181	West	-4.61691141102548	48.3392226541234	7.9639511300079	30.117918109667	195.854847970893	(7.8,8]	(30,40]	(190,200]
170220	West	-4.61680650102548	48.3392226541234	7.95958264342576	46.9083285579193	153.140862009231	(7.8,8]	(40,50]	(150,160]
170221	West	-4.61680381102548	48.3392226541234	7.82446431640513	42.1171549481531	161.771939575167	(7.8,8]	(40,50]	(160,170]
170222	West	-4.61680112102548	48.3392226541234	7.81434567325007	43.1233603552394	183.089132456477	(7.8,8]	(40,50]	(180,190]
170223	West	-4.61679843102548	48.3392226541234	7.84561997088135	44.3869841588364	173.168289288676	(7.8,8]	(40,50]	(170,180]
170224	West	-4.61679574102548	48.3392226541234	7.79472974239811	42.3632657322617	157.656022252867	(7.6,7.8]	(40,50]	(150,160]
170225	West	-4.61679305102548	48.3392226541234	7.70210784849335	35.3298789099529	160.395977802066	(7.6,7.8]	(30,40]	(160,170]
170226	West	-4.61679036102548	48.3392226541234	7.68325323608491	27.7015941421247	174.973961905616	(7.6,7.8]	(20,30]	(170,180]
170227	West	-4.61678767102548	48.3392226541234	7.68150545739419	22.480184242022	173.247571916559	(7.6,7.8]	(20,30]	(170,180]
170228	West	-4.61678498102548	48.3392226541234	7.65525429756757	17.0246159991181	148.04565348582	(7.6,7.8]	(10,20]	(140,150]
170229	West	-4.61678229102548	48.3392226541234	7.61752697084783	15.2910437761679	103.698093221153	(7.6,7.8]	(10,20]	(100,110]
170230	West	-4.61677960102548	48.3392226541234	7.59542968675483	32.5180365107901	85.4045182546806	(7.4,7.6]	(30,40]	(80,90]
170231	West	-4.61677691102548	48.3392226541234	7.39209769592342	48.1574507371326	94.6267843619538	(7.2,7.4]	(40,50]	(90,100]
170232	West	-4.61677422102548	48.3392226541234	7.14904925477684	50.0060922937318	117.795096076094	(7,7.2]	(50,60]	(110,120]
170233	West	-4.61677153102548	48.3392226541234	6.96289624424668	49.6903879417645	148.547288361166	(6.8,7]	(40,50]	(140,150]
170234	West	-4.61676884102548	48.3392226541234	6.87207872829779	49.0521514706812	171.154785663254	(6.8,7]	(40,50]	(170,180]
170235	West	-4.61676615102548	48.3392226541234	6.86595414675356	48.1396886851979	191.488075794105	(6.8,7]	(40,50]	(190,200]
170236	West	-4.61676346102548	48.3392226541234	6.9557626359152	51.3206012328243	218.76500481549	(6.8,7]	(50,60]	(210,220]
170237	West	-4.61676077102548	48.3392226541234	7.18239119785205	54.2731536197385	239.405720692503	(7,7.2]	(50,60]	(230,240]
170238	West	-4.61675808102548	48.3392226541234	7.44101839047105	49.049292217201	251.566016733755	(7.4,7.6]	(40,50]	(250,260]
170239	West	-4.61675539102548	48.3392226541234	7.62291711050897	36.8891734600036	259.725096019754	(7.6,7.8]	(30,40]	(250,260]
170240	West	-4.61675270102548	48.3392226541234	7.73493608289589	25.1039211778239	264.367166959858	(7.6,7.8]	(20,30]	(260,270]
170241	West	-4.61675001102548	48.3392226541234	7.80804418210697	17.3606800114563	266.675701895883	(7.8,8]	(10,20]	(260,270]
170242	West	-4.61674732102548	48.3392226541234	7.86049231932328	12.1887103979531	267.417386497363	(7.8,8]	(10,20]	(260,270]
170243	West	-4.61674463102548	48.3392226541234	7.89559163499157	6.80255221143365	268.28861032651	(7.8,8]	(0,10]	(260,270]
170256	West	-4.61670966102548	48.3392226541234	7.9971050999991	44.844892492725	149.486500784816	(7.8,8]	(40,50]	(140,150]
170257	West	-4.61670697102548	48.3392226541234	7.90096137654787	31.4649473317686	171.411244751586	(7.8,8]	(30,40]	(170,180]
170258	West	-4.61670428102548	48.3392226541234	7.91744109008298	16.9340791868975	259.512581074365	(7.8,8]	(10,20]	(250,260]
170259	West	-4.61670159102548	48.3392226541234	7.99731037899096	43.5080934729882	316.783487404171	(7.8,8]	(40,50]	(310,320]
170377	West	-4.61638417102548	48.3392226541234	7.96590371877752	52.919110274406	127.16335430191	(7.8,8]	(50,60]	(120,130]
170378	West	-4.61638148102548	48.3392226541234	7.69092186990604	62.3951288318039	122.108522735141	(7.6,7.8]	(60,70]	(120,130]
170379	West	-4.61637879102548	48.3392226541234	7.3028918120351	59.8612811407235	125.992278474455	(7.2,7.4]	(50,60]	(120,130]
170380	West	-4.61637610102548	48.3392226541234	7.1217358016574	46.2509254802989	152.901292241321	(7,7.2]	(40,50]	(150,160]
170381	West	-4.61637341102548	48.3392226541234	7.13329814771748	42.3899821996461	178.632485748041	(7,7.2]	(40,50]	(170,180]
170382	West	-4.61637072102548	48.3392226541234	7.14878983524966	43.5997163600252	187.778603054157	(7,7.2]	(40,50]	(180,190]
170383	West	-4.61636803102548	48.3392226541234	7.22155800231345	46.3774700816779	194.230230926783	(7.2,7.4]	(40,50]	(190,200]
170384	West	-4.61636534102548	48.3392226541234	7.28178621286257	47.7333915262748	179.827201999425	(7.2,7.4]	(40,50]	(170,180]
170385	West	-4.61636265102548	48.3392226541234	7.22269457172364	50.4866667034217	159.645064059693	(7.2,7.4]	(50,60]	(150,160]
170386	West	-4.61635996102548	48.3392226541234	7.11787366832611	45.4976256323249	164.550658956533	(7,7.2]	(40,50]	(160,170]
170387	West	-4.61635727102548	48.3392226541234	7.14503490340494	40.8718973359273	221.897815392949	(7,7.2]	(40,50]	(220,230]
170388	West	-4.61635458102548	48.3392226541234	7.38284955126904	47.5780715825555	237.903309997115	(7.2,7.4]	(40,50]	(230,240]
170389	West	-4.61635189102548	48.3392226541234	7.48625690099589	44.7918108643256	208.85277299044	(7.4,7.6]	(40,50]	(200,210]
170390	West	-4.61634920102548	48.3392226541234	7.5077690840894	45.3924940202949	192.117972545271	(7.4,7.6]	(40,50]	(190,200]
170391	West	-4.61634651102548	48.3392226541234	7.55316845673252	41.8010799136598	195.69640923498	(7.4,7.6]	(40,50]	(190,200]
170392	West	-4.61634382102548	48.3392226541234	7.59624448111919	39.1957088937812	207.540341084163	(7.4,7.6]	(30,40]	(200,210]
170393	West	-4.61634113102548	48.3392226541234	7.66812506429236	35.4766362795744	192.64124398073	(7.6,7.8]	(30,40]	(190,200]
170394	West	-4.61633844102548	48.3392226541234	7.6179968452922	41.677304121028	164.933980041071	(7.6,7.8]	(40,50]	(160,170]
170395	West	-4.61633575102548	48.3392226541234	7.57755845109546	47.4192213484729	162.216347540237	(7.4,7.6]	(40,50]	(160,170]
170396	West	-4.61633306102548	48.3392226541234	7.48727484900537	51.3369028006567	155.589435788214	(7.4,7.6]	(50,60]	(150,160]
170397	West	-4.61633037102548	48.3392226541234	7.32946120781839	56.0323742304672	152.089924765699	(7.2,7.4]	(50,60]	(150,160]
170398	West	-4.61632768102548	48.3392226541234	7.18790115919566	57.0329409892606	160.014013793701	(7,7.2]	(50,60]	(160,170]
170399	West	-4.61632499102548	48.3392226541234	7.10042993674178	56.7599093371999	165.509356943845	(7,7.2]	(50,60]	(160,170]
170400	West	-4.61632230102548	48.3392226541234	7.07268666217357	57.4216711635421	157.282758485203	(7,7.2]	(50,60]	(150,160]
170401	West	-4.61631961102548	48.3392226541234	6.94814249775638	57.0106205674992	158.43359742014	(6.8,7]	(50,60]	(150,160]
170402	West	-4.61631692102548	48.3392226541234	6.85099514129804	56.2172758680716	168.294922904054	(6.8,7]	(50,60]	(160,170]
170403	West	-4.61631423102548	48.3392226541234	6.79814521868873	48.4172641294092	181.099699673417	(6.6,6.8]	(40,50]	(180,190]
170404	West	-4.61631154102548	48.3392226541234	6.8065173321223	32.9871220800991	243.410219421189	(6.8,7]	(30,40]	(240,250]
171865	West	-4.61717503102548	48.3392208641234	7.97085419972655	72.2848906778147	157.438114921639	(7.8,8]	(70,80]	(150,160]
171866	West	-4.61717234102548	48.3392208641234	7.76775928236634	71.2091287395555	173.576055579168	(7.6,7.8]	(70,80]	(170,180]
171867	West	-4.61716965102548	48.3392208641234	7.65395591181396	39.6385545775791	144.916524925556	(7.6,7.8]	(30,40]	(140,150]
171868	West	-4.61716696102548	48.3392208641234	7.52210475096145	65.6449299188355	358.417882889051	(7.4,7.6]	(60,70]	(350,360]
171869	West	-4.61716427102548	48.3392208641234	7.66302367671334	74.7760061543128	328.589797770252	(7.6,7.8]	(70,80]	(320,330]
171932	West	-4.61699480102548	48.3392208641234	7.82426543905148	21.0972373951482	155.528251984119	(7.8,8]	(20,30]	(150,160]
171933	West	-4.61699211102548	48.3392208641234	7.78205433498979	27.1807129871034	147.308239958291	(7.6,7.8]	(20,30]	(140,150]
171934	West	-4.61698942102548	48.3392208641234	7.69532931788608	23.9309554377816	179.181086893433	(7.6,7.8]	(20,30]	(170,180]
171935	West	-4.61698673102548	48.3392208641234	7.76002680444079	26.3721300387918	185.129828283916	(7.6,7.8]	(20,30]	(180,190]
171936	West	-4.61698404102548	48.3392208641234	7.70316574752228	29.4614843829272	153.232594229134	(7.6,7.8]	(20,30]	(150,160]
171937	West	-4.61698135102548	48.3392208641234	7.64272113730695	29.2503971659245	151.385562073119	(7.6,7.8]	(20,30]	(150,160]
171938	West	-4.61697866102548	48.3392208641234	7.59685594277718	30.7729600608365	151.567812764615	(7.4,7.6]	(30,40]	(150,160]
171939	West	-4.61697597102548	48.3392208641234	7.52238739368502	32.5008813592097	156.551184391802	(7.4,7.6]	(30,40]	(150,160]
171940	West	-4.61697328102548	48.3392208641234	7.48626657926829	35.0397659580588	160.829220078454	(7.4,7.6]	(30,40]	(160,170]
171941	West	-4.61697059102548	48.3392208641234	7.44172570886195	37.3623145135745	160.152553190667	(7.4,7.6]	(30,40]	(160,170]
171942	West	-4.61696790102548	48.3392208641234	7.39646888869503	38.4803070415726	167.073494893009	(7.2,7.4]	(30,40]	(160,170]
171943	West	-4.61696521102548	48.3392208641234	7.37420971379934	43.5723557645528	168.896657499955	(7.2,7.4]	(40,50]	(160,170]
171944	West	-4.61696252102548	48.3392208641234	7.33149069644258	47.876469979428	169.760281887823	(7.2,7.4]	(40,50]	(160,170]
171945	West	-4.61695983102548	48.3392208641234	7.30713467881816	46.2396663273076	173.250342785464	(7.2,7.4]	(40,50]	(170,180]
171946	West	-4.61695714102548	48.3392208641234	7.27509272425347	42.5306900064453	167.241905489765	(7.2,7.4]	(40,50]	(160,170]
171947	West	-4.61695445102548	48.3392208641234	7.21970551483582	36.117047483262	172.758130668627	(7.2,7.4]	(30,40]	(170,180]
171948	West	-4.61695176102548	48.3392208641234	7.17770802113499	49.9812077750269	252.319059977021	(7,7.2]	(40,50]	(250,260]
171949	West	-4.61694907102548	48.3392208641234	7.66536871715383	64.0794606169744	269.335133074791	(7.6,7.8]	(60,70]	(260,270]
171962	West	-4.61691410102548	48.3392208641234	7.9065065903111	50.8373144716107	168.070613431697	(7.8,8]	(50,60]	(160,170]
172000	West	-4.61681188102548	48.3392208641234	7.87660152866831	54.861608247068	156.20331021807	(7.8,8]	(50,60]	(150,160]
172001	West	-4.61680919102548	48.3392208641234	7.78508139323715	49.1007563764435	161.154587425517	(7.6,7.8]	(40,50]	(160,170]
172002	West	-4.61680650102548	48.3392208641234	7.7369572555651	42.395069267601	163.159534700858	(7.6,7.8]	(40,50]	(160,170]
172003	West	-4.61680381102548	48.3392208641234	7.67999972065633	32.6836604319168	165.86496751014	(7.6,7.8]	(30,40]	(160,170]
172004	West	-4.61680112102548	48.3392208641234	7.65486316832509	26.931619396194	175.840956747134	(7.6,7.8]	(20,30]	(170,180]
172005	West	-4.61679843102548	48.3392208641234	7.64066756761448	29.9103698706076	167.857758588388	(7.6,7.8]	(20,30]	(160,170]
172006	West	-4.61679574102548	48.3392208641234	7.61108650663038	31.5907233370519	158.586514910244	(7.6,7.8]	(30,40]	(150,160]
172007	West	-4.61679305102548	48.3392208641234	7.58048469902405	26.5307898703231	168.220890270058	(7.4,7.6]	(20,30]	(160,170]
172008	West	-4.61679036102548	48.3392208641234	7.60000657582831	21.2613158822393	189.88580178445	(7.6,7.8]	(20,30]	(180,190]
172009	West	-4.61678767102548	48.3392208641234	7.61223133016385	14.8392597323202	197.579665001698	(7.6,7.8]	(10,20]	(190,200]
172010	West	-4.61678498102548	48.3392208641234	7.63024116471315	8.99860830348715	164.877426807527	(7.6,7.8]	(0,10]	(160,170]
172011	West	-4.61678229102548	48.3392208641234	7.62586328969268	18.1827627879828	130.159152232768	(7.6,7.8]	(10,20]	(130,140]
172012	West	-4.61677960102548	48.3392208641234	7.55432502010139	37.8710809576413	117.963493057628	(7.4,7.6]	(30,40]	(110,120]
172013	West	-4.61677691102548	48.3392208641234	7.36128447267568	57.0310470850111	112.448517167068	(7.2,7.4]	(50,60]	(110,120]
172014	West	-4.61677422102548	48.3392208641234	6.98672599880378	61.1648888275757	121.143109647039	(6.8,7]	(60,70]	(120,130]
172015	West	-4.61677153102548	48.3392208641234	6.70986782473371	53.9845645068105	146.215428300353	(6.6,6.8]	(50,60]	(140,150]
172016	West	-4.61676884102548	48.3392208641234	6.65897599608766	46.5752084689637	176.138162643316	(6.6,6.8]	(40,50]	(170,180]
172017	West	-4.61676615102548	48.3392208641234	6.6752484577124	43.4013609821042	200.21810647933	(6.6,6.8]	(40,50]	(200,210]
172018	West	-4.61676346102548	48.3392208641234	6.77841651600305	50.2137147109695	232.633480039204	(6.6,6.8]	(50,60]	(230,240]
172019	West	-4.61676077102548	48.3392208641234	7.05018741573037	58.0483674807907	252.195987522619	(7,7.2]	(50,60]	(250,260]
172020	West	-4.61675808102548	48.3392208641234	7.3882383315822	54.6073281942614	261.828625354602	(7.2,7.4]	(50,60]	(260,270]
172021	West	-4.61675539102548	48.3392208641234	7.60957108995068	40.5084567313486	269.163174877182	(7.6,7.8]	(40,50]	(260,270]
172022	West	-4.61675270102548	48.3392208641234	7.73533791985334	26.4043623176962	275.137261408997	(7.6,7.8]	(20,30]	(270,280]
172023	West	-4.61675001102548	48.3392208641234	7.81222379643568	17.6830151827503	278.675824148175	(7.8,8]	(10,20]	(270,280]
172024	West	-4.61674732102548	48.3392208641234	7.86378436860835	12.2244971353207	280.618958152703	(7.8,8]	(10,20]	(280,290]
172025	West	-4.61674463102548	48.3392208641234	7.89762073485678	8.33624139849427	289.801173201631	(7.8,8]	(0,10]	(280,290]
172037	West	-4.61671235102548	48.3392208641234	7.96258640761745	42.2906858867389	144.078252539438	(7.8,8]	(40,50]	(140,150]
172038	West	-4.61670966102548	48.3392208641234	7.83549151991187	25.7886611632912	156.394533487072	(7.8,8]	(20,30]	(150,160]
172039	West	-4.61670697102548	48.3392208641234	7.83303863481002	27.5014131078036	292.092326883819	(7.8,8]	(20,30]	(290,300]
172159	West	-4.61638417102548	48.3392208641234	7.85326829478559	52.673894677683	109.035272024524	(7.8,8]	(50,60]	(100,110]
172160	West	-4.61638148102548	48.3392208641234	7.51402322874903	59.5795863834398	104.48718174551	(7.4,7.6]	(50,60]	(100,110]
172161	West	-4.61637879102548	48.3392208641234	7.1821841623167	54.1288550611229	106.45744184788	(7,7.2]	(50,60]	(100,110]
172162	West	-4.61637610102548	48.3392208641234	7.02135118653161	32.2842209161654	130.536962411931	(7,7.2]	(30,40]	(130,140]
172163	West	-4.61637341102548	48.3392208641234	6.99029417672531	28.3900494846385	167.538318699584	(6.8,7]	(20,30]	(160,170]
172164	West	-4.61637072102548	48.3392208641234	6.97334959541389	37.104312762123	177.446258017615	(6.8,7]	(30,40]	(170,180]
172165	West	-4.61636803102548	48.3392208641234	6.98373691701827	46.2178920960024	183.467563844953	(6.8,7]	(40,50]	(180,190]
172166	West	-4.61636534102548	48.3392208641234	7.00839259166398	51.7764688349802	174.890412151076	(7,7.2]	(50,60]	(170,180]
172167	West	-4.61636265102548	48.3392208641234	6.95142372770462	53.9359304715726	163.164748313547	(6.8,7]	(50,60]	(160,170]
172168	West	-4.61635996102548	48.3392208641234	6.83610867057662	49.3865098488902	180.362398043534	(6.8,7]	(40,50]	(180,190]
172169	West	-4.61635727102548	48.3392208641234	6.93721139960544	52.0278101228989	218.26994427304	(6.8,7]	(50,60]	(210,220]
172170	West	-4.61635458102548	48.3392208641234	7.17382676254216	51.7978766474202	217.028377140467	(7,7.2]	(50,60]	(210,220]
172171	West	-4.61635189102548	48.3392208641234	7.24114046293868	46.2608513348531	202.828060697345	(7.2,7.4]	(40,50]	(200,210]
172172	West	-4.61634920102548	48.3392208641234	7.29523000798658	39.6655303903141	209.006488605468	(7.2,7.4]	(30,40]	(200,210]
172173	West	-4.61634651102548	48.3392208641234	7.38244709479027	32.9003891880758	217.142896379061	(7.2,7.4]	(30,40]	(210,220]
172174	West	-4.61634382102548	48.3392208641234	7.46383356294852	32.1577995355448	233.124469390405	(7.4,7.6]	(30,40]	(230,240]
172175	West	-4.61634113102548	48.3392208641234	7.6122658069637	17.3214020704561	214.858485185297	(7.6,7.8]	(10,20]	(210,220]
172176	West	-4.61633844102548	48.3392208641234	7.54357973336102	27.1331302102422	122.163487987543	(7.4,7.6]	(20,30]	(120,130]
172177	West	-4.61633575102548	48.3392208641234	7.41122701687932	30.8967340941063	132.83404067895	(7.4,7.6]	(30,40]	(130,140]
172178	West	-4.61633306102548	48.3392208641234	7.37723784829292	37.6929017354407	129.535014533369	(7.2,7.4]	(30,40]	(120,130]
172179	West	-4.61633037102548	48.3392208641234	7.19981999163934	47.0511815816615	123.781624741265	(7,7.2]	(40,50]	(120,130]
172180	West	-4.61632768102548	48.3392208641234	7.03421630111517	43.8311135542782	140.613912992654	(7,7.2]	(40,50]	(140,150]
172181	West	-4.61632499102548	48.3392208641234	6.98980846829464	45.9549546019004	151.494281695126	(6.8,7]	(40,50]	(150,160]
172182	West	-4.61632230102548	48.3392208641234	6.84247614062459	52.4418068082805	149.180363794735	(6.8,7]	(50,60]	(140,150]
172183	West	-4.61631961102548	48.3392208641234	6.69058223560171	52.3629051969259	154.88174076805	(6.6,6.8]	(50,60]	(150,160]
172184	West	-4.61631692102548	48.3392208641234	6.59227694411384	43.5528809378452	172.740933030789	(6.4,6.6]	(40,50]	(170,180]
172185	West	-4.61631423102548	48.3392208641234	6.5956090573397	41.8770187063922	253.645695299842	(6.4,6.6]	(40,50]	(250,260]
172186	West	-4.61631154102548	48.3392208641234	6.92420543882795	54.9243989678765	290.927126732696	(6.8,7]	(50,60]	(290,300]
172187	West	-4.61630885102548	48.3392208641234	7.20689008441113	33.4542494706945	333.506513579079	(7.2,7.4]	(30,40]	(330,340]
173645	West	-4.61718041102548	48.3392190741234	7.91995608010358	72.0334273120809	156.803034274326	(7.8,8]	(70,80]	(150,160]
173646	West	-4.61717772102548	48.3392190741234	7.75415359476427	77.0492622800412	151.459669917332	(7.6,7.8]	(70,80]	(150,160]
173647	West	-4.61717503102548	48.3392190741234	6.91665263808816	77.6549390838816	158.658895843553	(6.8,7]	(70,80]	(150,160]
173648	West	-4.61717234102548	48.3392190741234	6.6855434241681	73.672286093668	199.393311160968	(6.6,6.8]	(70,80]	(190,200]
173649	West	-4.61716965102548	48.3392190741234	7.37267462108593	69.4530967585128	246.963756118285	(7.2,7.4]	(60,70]	(240,250]
173650	West	-4.61716696102548	48.3392190741234	7.92670064882162	65.633520214633	295.695589341637	(7.8,8]	(60,70]	(290,300]
173714	West	-4.61699480102548	48.3392190741234	7.68757244716144	29.5943175881057	143.709638090731	(7.6,7.8]	(20,30]	(140,150]
173715	West	-4.61699211102548	48.3392190741234	7.61676577027173	29.7480879538999	155.009244495541	(7.6,7.8]	(20,30]	(150,160]
173716	West	-4.61698942102548	48.3392190741234	7.60148915261454	26.420555669935	176.338082550027	(7.6,7.8]	(20,30]	(170,180]
173717	West	-4.61698673102548	48.3392190741234	7.61876538787435	27.6925424948291	179.034967375993	(7.6,7.8]	(20,30]	(170,180]
173718	West	-4.61698404102548	48.3392190741234	7.60428396882979	28.5135186214618	159.03780379247	(7.6,7.8]	(20,30]	(150,160]
173719	West	-4.61698135102548	48.3392190741234	7.54983115651505	29.2987228905548	148.967083478222	(7.4,7.6]	(20,30]	(140,150]
173720	West	-4.61697866102548	48.3392190741234	7.49079733214645	30.6776439166557	147.856128476774	(7.4,7.6]	(30,40]	(140,150]
173721	West	-4.61697597102548	48.3392190741234	7.42532609733626	31.0653263799623	150.000980832098	(7.4,7.6]	(30,40]	(150,160]
173722	West	-4.61697328102548	48.3392190741234	7.37048215201004	33.4964479487722	151.256885151495	(7.2,7.4]	(30,40]	(150,160]
173723	West	-4.61697059102548	48.3392190741234	7.29003968165949	36.1802779948139	155.012707554501	(7.2,7.4]	(30,40]	(150,160]
173724	West	-4.61696790102548	48.3392190741234	7.24230069826772	40.8470323396738	158.080277289671	(7.2,7.4]	(40,50]	(150,160]
173725	West	-4.61696521102548	48.3392190741234	7.18277777083035	47.7838886487788	157.923447247974	(7,7.2]	(40,50]	(150,160]
173726	West	-4.61696252102548	48.3392190741234	7.06886049525189	50.2876511479392	167.027508950301	(7,7.2]	(50,60]	(160,170]
173727	West	-4.61695983102548	48.3392190741234	7.0634551739184	49.5310616846123	180.145953647785	(7,7.2]	(40,50]	(180,190]
173728	West	-4.61695714102548	48.3392190741234	7.09795748108258	46.9649772064345	175.552723634784	(7,7.2]	(40,50]	(170,180]
173729	West	-4.61695445102548	48.3392190741234	7.03186055364453	36.9142077737145	209.523872194983	(7,7.2]	(30,40]	(200,210]
173730	West	-4.61695176102548	48.3392190741234	7.21508194717593	58.6755240732252	268.598125801618	(7.2,7.4]	(50,60]	(260,270]
173731	West	-4.61694907102548	48.3392190741234	7.68337714122306	65.6867036281844	277.076745444792	(7.6,7.8]	(60,70]	(270,280]
173741	West	-4.61692217102548	48.3392190741234	7.85635988760004	62.7389303408751	152.016147599624	(7.8,8]	(60,70]	(150,160]
173742	West	-4.61691948102548	48.3392190741234	7.93149868767649	53.9579210722272	173.296501603304	(7.8,8]	(50,60]	(170,180]
173743	West	-4.61691679102548	48.3392190741234	7.75337075883721	51.0649510318952	150.962076532288	(7.6,7.8]	(50,60]	(150,160]
173744	West	-4.61691410102548	48.3392190741234	7.52983178054129	41.5318957524681	184.03706808203	(7.4,7.6]	(40,50]	(180,190]
173745	West	-4.61691141102548	48.3392190741234	7.84733642818673	47.4407027072895	207.886612979741	(7.8,8]	(40,50]	(200,210]
173746	West	-4.61690872102548	48.3392190741234	7.83779991744642	43.609757238494	183.822431145531	(7.8,8]	(40,50]	(180,190]
173747	West	-4.61690603102548	48.3392190741234	7.83890993542242	37.4072463134096	190.797003136193	(7.8,8]	(30,40]	(190,200]
173748	West	-4.61690334102548	48.3392190741234	7.86541243419298	31.1208537722899	200.17701354504	(7.8,8]	(30,40]	(200,210]
173749	West	-4.61690065102548	48.3392190741234	7.9225509806007	38.9109492537679	230.373524574708	(7.8,8]	(30,40]	(230,240]
173780	West	-4.61681726102548	48.3392190741234	7.87014127761129	54.513010175519	150.586836456369	(7.8,8]	(50,60]	(150,160]
173781	West	-4.61681457102548	48.3392190741234	7.76385278326125	48.0377755614858	155.488724559424	(7.6,7.8]	(40,50]	(150,160]
173782	West	-4.61681188102548	48.3392190741234	7.66139925154144	39.6334518597379	155.86369583413	(7.6,7.8]	(30,40]	(150,160]
173783	West	-4.61680919102548	48.3392190741234	7.6170724306163	28.1474166692695	162.830447008795	(7.6,7.8]	(20,30]	(160,170]
173784	West	-4.61680650102548	48.3392190741234	7.58067283137598	15.8000204887413	173.283615620819	(7.4,7.6]	(10,20]	(170,180]
173785	West	-4.61680381102548	48.3392190741234	7.60821998112006	6.23541802226015	201.94331811829	(7.6,7.8]	(0,10]	(200,210]
173786	West	-4.61680112102548	48.3392190741234	7.64060040255705	3.17801317888911	121.302703887344	(7.6,7.8]	(0,10]	(120,130]
173787	West	-4.61679843102548	48.3392190741234	7.60705751005055	9.93042434480411	101.426443230311	(7.6,7.8]	(0,10]	(100,110]
173788	West	-4.61679574102548	48.3392190741234	7.5550876318725	11.7255792615342	104.445442646571	(7.4,7.6]	(10,20]	(100,110]
173789	West	-4.61679305102548	48.3392190741234	7.51339897516567	9.07640463879788	137.540925064754	(7.4,7.6]	(0,10]	(130,140]
173790	West	-4.61679036102548	48.3392190741234	7.52643152313854	12.6481026738396	203.80693640133	(7.4,7.6]	(10,20]	(200,210]
173791	West	-4.61678767102548	48.3392190741234	7.57688614633452	15.6458219289216	216.464331059265	(7.4,7.6]	(10,20]	(210,220]
173792	West	-4.61678498102548	48.3392190741234	7.62138756531983	17.0292291114597	162.052356343524	(7.6,7.8]	(10,20]	(160,170]
173793	West	-4.61678229102548	48.3392190741234	7.54781300657513	34.330521223161	137.136025662114	(7.4,7.6]	(30,40]	(130,140]
173794	West	-4.61677960102548	48.3392190741234	7.43332097079906	51.6763229303356	131.062549411198	(7.4,7.6]	(50,60]	(130,140]
173795	West	-4.61677691102548	48.3392190741234	7.2086247182804	64.6422675793785	124.427134689311	(7.2,7.4]	(60,70]	(120,130]
173796	West	-4.61677422102548	48.3392190741234	6.74594181352009	65.6780947173059	127.768077418637	(6.6,6.8]	(60,70]	(120,130]
173797	West	-4.61677153102548	48.3392190741234	6.465150415571	55.3283424894568	151.517569646172	(6.4,6.6]	(50,60]	(150,160]
173798	West	-4.61676884102548	48.3392190741234	6.46033329631993	47.4061709096102	186.968172606357	(6.4,6.6]	(40,50]	(180,190]
173799	West	-4.61676615102548	48.3392190741234	6.5180166423104	44.7622023333158	212.229865116479	(6.4,6.6]	(40,50]	(210,220]
173800	West	-4.61676346102548	48.3392190741234	6.6582090492766	52.5759440422077	243.995980785549	(6.6,6.8]	(50,60]	(240,250]
173801	West	-4.61676077102548	48.3392190741234	6.97144861343165	62.0132188709445	262.377461009749	(6.8,7]	(60,70]	(260,270]
173802	West	-4.61675808102548	48.3392190741234	7.38419658420638	58.7243694982177	271.890322620115	(7.2,7.4]	(50,60]	(270,280]
173803	West	-4.61675539102548	48.3392190741234	7.63072874041836	42.1416863625539	280.016118795827	(7.6,7.8]	(40,50]	(280,290]
173804	West	-4.61675270102548	48.3392190741234	7.75637756308535	26.5448633765581	284.642252815522	(7.6,7.8]	(20,30]	(280,290]
173805	West	-4.61675001102548	48.3392190741234	7.82774472892944	17.5774822022773	287.936687696268	(7.8,8]	(10,20]	(280,290]
173806	West	-4.61674732102548	48.3392190741234	7.87579833557405	12.6750887164898	292.6194222432	(7.8,8]	(10,20]	(290,300]
173807	West	-4.61674463102548	48.3392190741234	7.90849642896029	10.2568879083148	299.974077155991	(7.8,8]	(10,20]	(290,300]
173818	West	-4.61671504102548	48.3392190741234	7.94949837008164	43.0215012349802	151.288840555734	(7.8,8]	(40,50]	(150,160]
173819	West	-4.61671235102548	48.3392190741234	7.8018469181507	30.2477399287007	153.765797096429	(7.8,8]	(30,40]	(150,160]
173820	West	-4.61670966102548	48.3392190741234	7.77019464467493	27.8553191473852	287.761704704433	(7.6,7.8]	(20,30]	(280,290]
173821	West	-4.61670697102548	48.3392190741234	7.98908635434083	54.8321313869684	307.690889280025	(7.8,8]	(50,60]	(300,310]
173941	West	-4.61638417102548	48.3392190741234	7.75959153729648	51.6734421088252	103.729331227526	(7.6,7.8]	(50,60]	(100,110]
173942	West	-4.61638148102548	48.3392190741234	7.53869885661721	59.0156975395156	99.7877328237532	(7.4,7.6]	(50,60]	(90,100]
173943	West	-4.61637879102548	48.3392190741234	7.13903975781967	54.1103195706203	103.654127212281	(7,7.2]	(50,60]	(100,110]
173944	West	-4.61637610102548	48.3392190741234	6.9813043144758	30.816687897839	124.347570226692	(6.8,7]	(30,40]	(120,130]
173945	West	-4.61637341102548	48.3392190741234	6.92782212788369	25.4900441374373	144.917788645511	(6.8,7]	(20,30]	(140,150]
173946	West	-4.61637072102548	48.3392190741234	6.8645369053868	30.1318580144537	155.538395716855	(6.8,7]	(30,40]	(150,160]
173947	West	-4.61636803102548	48.3392190741234	6.79900812039412	36.1330400925691	164.907410030942	(6.6,6.8]	(30,40]	(160,170]
173948	West	-4.61636534102548	48.3392190741234	6.76195239412474	42.7427281833088	163.528840648923	(6.6,6.8]	(40,50]	(160,170]
173949	West	-4.61636265102548	48.3392190741234	6.68242842095695	44.4982689318494	160.047106671048	(6.6,6.8]	(40,50]	(160,170]
173950	West	-4.61635996102548	48.3392190741234	6.63714754374064	38.9372649035539	197.671688250694	(6.6,6.8]	(30,40]	(190,200]
173951	West	-4.61635727102548	48.3392190741234	6.80025824972968	46.5715171356457	231.563144972474	(6.8,7]	(40,50]	(230,240]
173952	West	-4.61635458102548	48.3392190741234	6.96037910067132	44.3419210361147	221.782574307349	(6.8,7]	(40,50]	(220,230]
173953	West	-4.61635189102548	48.3392190741234	7.069704481251	42.871051871512	216.758905864981	(7,7.2]	(40,50]	(210,220]
173954	West	-4.61634920102548	48.3392190741234	7.23825794781187	41.0794351829483	222.627213547617	(7.2,7.4]	(40,50]	(220,230]
173955	West	-4.61634651102548	48.3392190741234	7.36046122394211	36.9189686431532	216.855549682117	(7.2,7.4]	(30,40]	(210,220]
173956	West	-4.61634382102548	48.3392190741234	7.43460554895088	39.8989143984289	223.110688023925	(7.4,7.6]	(30,40]	(220,230]
173957	West	-4.61634113102548	48.3392190741234	7.58672761410064	31.9807958014878	207.149263739093	(7.4,7.6]	(30,40]	(200,210]
173958	West	-4.61633844102548	48.3392190741234	7.53721008220781	25.5254695657732	134.754083584761	(7.4,7.6]	(20,30]	(130,140]
173959	West	-4.61633575102548	48.3392190741234	7.38857288245592	24.3833268202764	103.816770293481	(7.2,7.4]	(20,30]	(100,110]
173960	West	-4.61633306102548	48.3392190741234	7.3018240927648	32.9628257885611	96.4859985283927	(7.2,7.4]	(30,40]	(90,100]
173961	West	-4.61633037102548	48.3392190741234	7.11053262678123	47.6207237776504	100.610012533176	(7,7.2]	(40,50]	(100,110]
173962	West	-4.61632768102548	48.3392190741234	6.86537140910525	41.7043115214146	118.131267999431	(6.8,7]	(40,50]	(110,120]
173963	West	-4.61632499102548	48.3392190741234	6.78955136633275	42.9361758469302	132.339062242816	(6.6,6.8]	(40,50]	(130,140]
173964	West	-4.61632230102548	48.3392190741234	6.57833520439902	46.8344066689593	133.02989480875	(6.4,6.6]	(40,50]	(130,140]
173965	West	-4.61631961102548	48.3392190741234	6.47929465265932	37.4610953055816	147.399726999178	(6.4,6.6]	(30,40]	(140,150]
173966	West	-4.61631692102548	48.3392190741234	6.42385571970992	23.7692615050868	233.898787897015	(6.4,6.6]	(20,30]	(230,240]
173967	West	-4.61631423102548	48.3392190741234	6.62794485760745	59.5455668102173	281.510515089465	(6.6,6.8]	(50,60]	(280,290]
173968	West	-4.61631154102548	48.3392190741234	7.17433776301093	57.7740582254024	290.224249036824	(7,7.2]	(50,60]	(290,300]
173969	West	-4.61630885102548	48.3392190741234	7.28087425311273	18.3080413113167	359.605821790669	(7.2,7.4]	(10,20]	(350,360]
175421	West	-4.61719655102548	48.3392172841234	7.96591036023752	58.6743201547293	145.711521115577	(7.8,8]	(50,60]	(140,150]
175422	West	-4.61719386102548	48.3392172841234	7.8242163555158	52.3015684828804	161.849902487699	(7.8,8]	(50,60]	(160,170]
175423	West	-4.61719117102548	48.3392172841234	7.84766257668479	51.7414180989487	175.014817910549	(7.8,8]	(50,60]	(170,180]
175424	West	-4.61718848102548	48.3392172841234	7.83408801915909	58.5348377501314	170.040019194014	(7.8,8]	(50,60]	(170,180]
175425	West	-4.61718579102548	48.3392172841234	7.75363906108182	66.2009015315936	164.103747901279	(7.6,7.8]	(60,70]	(160,170]
175426	West	-4.61718310102548	48.3392172841234	7.61040052563586	73.7204834752132	152.921273109976	(7.6,7.8]	(70,80]	(150,160]
175427	West	-4.61718041102548	48.3392172841234	7.13184982836763	78.0226076012909	151.653270989123	(7,7.2]	(70,80]	(150,160]
175428	West	-4.61717772102548	48.3392172841234	6.54534918061955	77.724224002332	153.983389220946	(6.4,6.6]	(70,80]	(150,160]
175429	West	-4.61717503102548	48.3392172841234	6.07917488298429	66.5185352095694	172.057933989439	(6,6.2]	(60,70]	(170,180]
175430	West	-4.61717234102548	48.3392172841234	6.34682952464232	69.4613682159352	260.098038923977	(6.2,6.4]	(60,70]	(260,270]
175431	West	-4.61716965102548	48.3392172841234	7.28899712511785	74.7102787084216	271.224737606969	(7.2,7.4]	(70,80]	(270,280]
175494	West	-4.61700018102548	48.3392172841234	7.72483436197462	31.8591139576355	151.213776435733	(7.6,7.8]	(30,40]	(150,160]
175495	West	-4.61699749102548	48.3392172841234	7.73409403663134	31.3866739017242	149.53279276696	(7.6,7.8]	(30,40]	(140,150]
175496	West	-4.61699480102548	48.3392172841234	7.62148713742275	31.2161470296574	139.794725726783	(7.6,7.8]	(30,40]	(130,140]
175497	West	-4.61699211102548	48.3392172841234	7.55194678506443	24.79037299666	154.33762542875	(7.4,7.6]	(20,30]	(150,160]
175498	West	-4.61698942102548	48.3392172841234	7.53811495594865	22.6864969612135	173.147693827928	(7.4,7.6]	(20,30]	(170,180]
175499	West	-4.61698673102548	48.3392172841234	7.5194428441107	24.1773579361247	173.559702403343	(7.4,7.6]	(20,30]	(170,180]
175500	West	-4.61698404102548	48.3392172841234	7.51061280062227	26.3522287689503	161.334392118774	(7.4,7.6]	(20,30]	(160,170]
175501	West	-4.61698135102548	48.3392172841234	7.46513004302119	29.8453785254194	147.137673689371	(7.4,7.6]	(20,30]	(140,150]
175502	West	-4.61697866102548	48.3392172841234	7.38323568560564	30.8907753868972	146.391431515904	(7.2,7.4]	(30,40]	(140,150]
175503	West	-4.61697597102548	48.3392172841234	7.3318721236771	32.1333374291056	147.579611314867	(7.2,7.4]	(30,40]	(140,150]
175504	West	-4.61697328102548	48.3392172841234	7.25482858981594	35.0641259306443	146.011444152969	(7.2,7.4]	(30,40]	(140,150]
175505	West	-4.61697059102548	48.3392172841234	7.17633085657089	34.9735347203355	150.544283784356	(7,7.2]	(30,40]	(150,160]
175506	West	-4.61696790102548	48.3392172841234	7.10903458754503	38.4468305915631	144.389301754941	(7,7.2]	(30,40]	(140,150]
175507	West	-4.61696521102548	48.3392172841234	6.94439995248055	44.2125792778941	141.396394521861	(6.8,7]	(40,50]	(140,150]
175508	West	-4.61696252102548	48.3392172841234	6.8612180651952	45.1132951261122	157.036258513616	(6.8,7]	(40,50]	(150,160]
175509	West	-4.61695983102548	48.3392172841234	6.81973830430528	47.0995273023339	178.666354477775	(6.8,7]	(40,50]	(170,180]
175510	West	-4.61695714102548	48.3392172841234	6.86417674689076	46.7938132372045	183.314730876214	(6.8,7]	(40,50]	(180,190]
175511	West	-4.61695445102548	48.3392172841234	6.83810573361704	51.2639812075665	240.632668313616	(6.8,7]	(50,60]	(240,250]
175512	West	-4.61695176102548	48.3392172841234	7.3167950886768	64.9564684271997	269.890466736123	(7.2,7.4]	(60,70]	(260,270]
175513	West	-4.61694907102548	48.3392172841234	7.70514237551129	65.3741224986409	274.267959993665	(7.6,7.8]	(60,70]	(270,280]
175522	West	-4.61692486102548	48.3392172841234	7.77208788606299	67.4369330735338	146.708151529049	(7.6,7.8]	(60,70]	(140,150]
175523	West	-4.61692217102548	48.3392172841234	7.6477058514151	53.4661200847104	164.169781309224	(7.6,7.8]	(50,60]	(160,170]
175524	West	-4.61691948102548	48.3392172841234	7.56327013354912	40.5383268008706	186.015536444542	(7.4,7.6]	(40,50]	(180,190]
175525	West	-4.61691679102548	48.3392172841234	7.68831600571955	23.2207850790208	162.301117909498	(7.6,7.8]	(20,30]	(160,170]
175526	West	-4.61691410102548	48.3392172841234	7.64504494583078	10.5221664903653	183.585206603753	(7.6,7.8]	(10,20]	(180,190]
175527	West	-4.61691141102548	48.3392172841234	7.64281420696926	25.2977437872556	222.50686730331	(7.6,7.8]	(20,30]	(220,230]
175528	West	-4.61690872102548	48.3392172841234	7.68123059802701	23.9350878085579	213.040183773764	(7.6,7.8]	(20,30]	(210,220]
175529	West	-4.61690603102548	48.3392172841234	7.77277889366895	20.7210581469462	227.818408480241	(7.6,7.8]	(20,30]	(220,230]
175530	West	-4.61690334102548	48.3392172841234	7.85447485915956	19.7844469460273	224.631123374469	(7.8,8]	(10,20]	(220,230]
175531	West	-4.61690065102548	48.3392172841234	7.91424622139817	32.10254196749	221.992988731526	(7.8,8]	(30,40]	(220,230]
175561	West	-4.61681995102548	48.3392172841234	7.80202475847385	57.9520470879848	137.069030778461	(7.8,8]	(50,60]	(130,140]
175562	West	-4.61681726102548	48.3392172841234	7.63116596834334	42.6788924012586	150.353035083536	(7.6,7.8]	(40,50]	(150,160]
175563	West	-4.61681457102548	48.3392172841234	7.60998197107668	26.5185078067643	161.440881950448	(7.6,7.8]	(20,30]	(160,170]
175564	West	-4.61681188102548	48.3392172841234	7.5761661102981	10.8417891083539	153.217472782684	(7.4,7.6]	(10,20]	(150,160]
175565	West	-4.61680919102548	48.3392172841234	7.58619438245813	4.36262563930431	313.572854417095	(7.4,7.6]	(0,10]	(310,320]
175566	West	-4.61680650102548	48.3392172841234	7.62576558315672	11.0349875406008	329.853162979439	(7.6,7.8]	(10,20]	(320,330]
175567	West	-4.61680381102548	48.3392172841234	7.65628069658577	8.69248535168829	336.718700878354	(7.6,7.8]	(0,10]	(330,340]
175568	West	-4.61680112102548	48.3392172841234	7.6530211487448	5.95090274222576	21.4584617448355	(7.6,7.8]	(0,10]	(20,30]
175569	West	-4.61679843102548	48.3392172841234	7.62239220624135	11.428620329102	38.5369463591662	(7.6,7.8]	(10,20]	(30,40]
175570	West	-4.61679574102548	48.3392172841234	7.59455963267548	16.6298599754783	42.9111528272667	(7.4,7.6]	(10,20]	(40,50]
175571	West	-4.61679305102548	48.3392172841234	7.54982979031809	15.7878015019384	58.0355566309127	(7.4,7.6]	(10,20]	(50,60]
175572	West	-4.61679036102548	48.3392172841234	7.49122354974593	1.93609055676875	119.102696982268	(7.4,7.6]	(0,10]	(110,120]
175573	West	-4.61678767102548	48.3392172841234	7.53535414204301	13.3383909619219	193.017028617417	(7.4,7.6]	(10,20]	(190,200]
175574	West	-4.61678498102548	48.3392172841234	7.53613189576204	28.926455754585	148.711810612986	(7.4,7.6]	(20,30]	(140,150]
175575	West	-4.61678229102548	48.3392172841234	7.4295744944908	46.9237555108889	134.768406822365	(7.4,7.6]	(40,50]	(130,140]
175576	West	-4.61677960102548	48.3392172841234	7.24839576165556	62.8691502961437	130.183409727722	(7.2,7.4]	(60,70]	(130,140]
175577	West	-4.61677691102548	48.3392172841234	6.85352557027407	69.3268303911171	130.38772387032	(6.8,7]	(60,70]	(130,140]
175578	West	-4.61677422102548	48.3392172841234	6.41928967516781	66.519145446632	136.493465146525	(6.4,6.6]	(60,70]	(130,140]
175579	West	-4.61677153102548	48.3392172841234	6.20683073825055	55.4264507840129	160.955380695287	(6.2,6.4]	(50,60]	(160,170]
175580	West	-4.61676884102548	48.3392172841234	6.22038742865546	48.7067254824972	201.427154495921	(6.2,6.4]	(40,50]	(200,210]
175581	West	-4.61676615102548	48.3392172841234	6.34585182089639	47.5072130271324	227.385127723168	(6.2,6.4]	(40,50]	(220,230]
175582	West	-4.61676346102548	48.3392172841234	6.54742851796796	56.456976131581	251.913346825239	(6.4,6.6]	(50,60]	(250,260]
175583	West	-4.61676077102548	48.3392172841234	6.9343384167436	66.6694809583367	268.119646512635	(6.8,7]	(60,70]	(260,270]
175584	West	-4.61675808102548	48.3392172841234	7.45568544001057	62.1754763667994	279.14820650213	(7.4,7.6]	(60,70]	(270,280]
175585	West	-4.61675539102548	48.3392172841234	7.67651379373489	40.4562446197616	292.215831274745	(7.6,7.8]	(40,50]	(290,300]
175586	West	-4.61675270102548	48.3392172841234	7.78321016440091	26.271581122618	295.568014641284	(7.6,7.8]	(20,30]	(290,300]
175587	West	-4.61675001102548	48.3392172841234	7.84949157750436	19.3512134338956	303.624801300537	(7.8,8]	(10,20]	(300,310]
175588	West	-4.61674732102548	48.3392172841234	7.89585431917485	16.5512079488606	313.496863738586	(7.8,8]	(10,20]	(310,320]
175589	West	-4.61674463102548	48.3392172841234	7.93317843039509	12.0226979413395	324.889780174896	(7.8,8]	(10,20]	(320,330]
175590	West	-4.61674194102548	48.3392172841234	7.95442366497123	3.52484335645146	263.505134545746	(7.8,8]	(0,10]	(260,270]
175591	West	-4.61673925102548	48.3392172841234	7.98943147454067	18.1872282187627	203.379789003605	(7.8,8]	(10,20]	(200,210]
175596	West	-4.61672580102548	48.3392172841234	7.93211736440676	47.2527014463825	166.58570799671	(7.8,8]	(40,50]	(160,170]
175597	West	-4.61672311102548	48.3392172841234	7.8471649971356	46.684903900264	175.73620470768	(7.8,8]	(40,50]	(170,180]
175598	West	-4.61672042102548	48.3392172841234	7.8604757211764	43.3168308347691	173.657502136265	(7.8,8]	(40,50]	(170,180]
175599	West	-4.61671773102548	48.3392172841234	7.80560770626461	41.5670293702064	158.470941368326	(7.8,8]	(40,50]	(150,160]
175600	West	-4.61671504102548	48.3392172841234	7.71701734966355	29.3240462429751	164.909569981488	(7.6,7.8]	(20,30]	(160,170]
175601	West	-4.61671235102548	48.3392172841234	7.69287486721937	24.584417972757	290.108812974374	(7.6,7.8]	(20,30]	(290,300]
175602	West	-4.61670966102548	48.3392172841234	7.8898168683165	55.8004545940677	305.734108381758	(7.8,8]	(50,60]	(300,310]
175722	West	-4.61638686102548	48.3392172841234	7.91836698535576	58.6279292182433	118.6090123522	(7.8,8]	(50,60]	(110,120]
175723	West	-4.61638417102548	48.3392172841234	7.70082447572944	53.8013672926941	122.608558759275	(7.6,7.8]	(50,60]	(120,130]
175724	West	-4.61638148102548	48.3392172841234	7.45731774844989	60.6366626497	112.401923115672	(7.4,7.6]	(60,70]	(110,120]
175725	West	-4.61637879102548	48.3392172841234	6.99977059783648	53.886760958272	113.609300280083	(6.8,7]	(50,60]	(110,120]
175726	West	-4.61637610102548	48.3392172841234	6.92632653348906	26.8961086824683	131.645043489132	(6.8,7]	(20,30]	(130,140]
175727	West	-4.61637341102548	48.3392172841234	6.82983926255455	25.8831360111979	126.285491327245	(6.8,7]	(20,30]	(120,130]
175728	West	-4.61637072102548	48.3392172841234	6.7715145165671	28.5166634055912	137.023504289006	(6.6,6.8]	(20,30]	(130,140]
175729	West	-4.61636803102548	48.3392172841234	6.71130210870386	29.5804256027945	146.664652877625	(6.6,6.8]	(20,30]	(140,150]
175730	West	-4.61636534102548	48.3392172841234	6.63892217563978	29.5992164290793	146.031656120983	(6.6,6.8]	(20,30]	(140,150]
175731	West	-4.61636265102548	48.3392172841234	6.5595215193799	25.1399074343867	148.377357449048	(6.4,6.6]	(20,30]	(140,150]
175732	West	-4.61635996102548	48.3392172841234	6.52684862446712	27.4158417021311	210.080742388665	(6.4,6.6]	(20,30]	(210,220]
175733	West	-4.61635727102548	48.3392172841234	6.72864173163009	44.2080881955877	224.157639685652	(6.6,6.8]	(40,50]	(220,230]
175734	West	-4.61635458102548	48.3392172841234	6.86035379402389	45.7824608046395	214.302864071559	(6.8,7]	(40,50]	(210,220]
175735	West	-4.61635189102548	48.3392172841234	6.92274678519366	46.6741533465243	212.157884640568	(6.8,7]	(40,50]	(210,220]
175736	West	-4.61634920102548	48.3392172841234	7.06784972550873	49.5691875588936	207.348900821401	(7,7.2]	(40,50]	(200,210]
175737	West	-4.61634651102548	48.3392172841234	7.14000454557133	51.2258343257307	199.199359961931	(7,7.2]	(50,60]	(190,200]
175738	West	-4.61634382102548	48.3392172841234	7.22416979854409	53.8955936413569	201.611152869436	(7.2,7.4]	(50,60]	(200,210]
175739	West	-4.61634113102548	48.3392172841234	7.36754523019035	54.4383131323616	193.189504797651	(7.2,7.4]	(50,60]	(190,200]
175740	West	-4.61633844102548	48.3392172841234	7.39292319743798	50.7976869189427	179.068113896085	(7.2,7.4]	(50,60]	(170,180]
175741	West	-4.61633575102548	48.3392172841234	7.42490382050242	43.3198813636077	166.230995349491	(7.4,7.6]	(40,50]	(160,170]
175742	West	-4.61633306102548	48.3392172841234	7.32913718718927	41.8955127155095	139.037019104284	(7.2,7.4]	(40,50]	(130,140]
175743	West	-4.61633037102548	48.3392172841234	7.1663536738821	50.4832082315925	115.060403245926	(7,7.2]	(50,60]	(110,120]
175744	West	-4.61632768102548	48.3392172841234	6.82973518358656	45.6005154793588	116.059421712863	(6.8,7]	(40,50]	(110,120]
175745	West	-4.61632499102548	48.3392172841234	6.76696351645839	41.7584677692928	120.65043308711	(6.6,6.8]	(40,50]	(120,130]
175746	West	-4.61632230102548	48.3392172841234	6.50037386689377	38.8614843802781	117.393889365284	(6.4,6.6]	(30,40]	(110,120]
175747	West	-4.61631961102548	48.3392172841234	6.44563441446861	17.9415730086344	131.826177163161	(6.4,6.6]	(10,20]	(130,140]
175748	West	-4.61631692102548	48.3392172841234	6.40213355120468	38.912156522439	271.715693576145	(6.4,6.6]	(30,40]	(270,280]
175749	West	-4.61631423102548	48.3392172841234	6.80995063498046	63.6615320506803	276.309047876377	(6.8,7]	(60,70]	(270,280]
175750	West	-4.61631154102548	48.3392172841234	7.22305083715695	51.5845010063966	275.518926800288	(7.2,7.4]	(50,60]	(270,280]
175751	West	-4.61630885102548	48.3392172841234	7.26321372756036	6.04955926075183	92.5463865969515	(7.2,7.4]	(0,10]	(90,100]
177202	West	-4.61719924102548	48.3392154941234	7.92932349941298	58.8639553159072	139.867692643304	(7.8,8]	(50,60]	(130,140]
177203	West	-4.61719655102548	48.3392154941234	7.72478167469285	59.275354788905	144.569089491028	(7.6,7.8]	(50,60]	(140,150]
177204	West	-4.61719386102548	48.3392154941234	7.61645858718857	62.8513013328803	159.587608013193	(7.6,7.8]	(60,70]	(150,160]
177205	West	-4.61719117102548	48.3392154941234	7.57027633658428	68.1021181248903	168.940327970677	(7.4,7.6]	(60,70]	(160,170]
177206	West	-4.61718848102548	48.3392154941234	7.4439491271412	70.6713126489078	167.794922290285	(7.4,7.6]	(70,80]	(160,170]
177207	West	-4.61718579102548	48.3392154941234	7.24012036043525	72.6346705620515	160.106214527316	(7.2,7.4]	(70,80]	(160,170]
177208	West	-4.61718310102548	48.3392154941234	6.92006290345977	75.9899919243863	145.713665963582	(6.8,7]	(70,80]	(140,150]
177209	West	-4.61718041102548	48.3392154941234	6.18653734415192	75.0458872870266	142.343519701598	(6,6.2]	(70,80]	(140,150]
177210	West	-4.61717772102548	48.3392154941234	5.7667975664281	52.6806582628064	167.85364023432	(5.6,5.8]	(50,60]	(160,170]
177211	West	-4.61717503102548	48.3392154941234	6.0851692410778	63.0498370710714	292.758950876241	(6,6.2]	(60,70]	(290,300]
177212	West	-4.61717234102548	48.3392154941234	6.7259775564537	73.130838079599	295.672889672892	(6.6,6.8]	(70,80]	(290,300]
177213	West	-4.61716965102548	48.3392154941234	7.39651133770863	71.7307955588761	280.528735316269	(7.2,7.4]	(70,80]	(280,290]
177214	West	-4.61716696102548	48.3392154941234	7.96239396012471	70.4391309221506	263.361051241699	(7.8,8]	(70,80]	(260,270]
177274	West	-4.61700556102548	48.3392154941234	7.79172506977714	37.6485040689455	152.794280908254	(7.6,7.8]	(30,40]	(150,160]
177275	West	-4.61700287102548	48.3392154941234	7.66353390206042	39.0538445042971	151.308811569558	(7.6,7.8]	(30,40]	(150,160]
177276	West	-4.61700018102548	48.3392154941234	7.62729606407502	32.8310335622127	156.915174354273	(7.6,7.8]	(30,40]	(150,160]
177277	West	-4.61699749102548	48.3392154941234	7.55962918288155	29.9344529232822	153.338106940621	(7.4,7.6]	(20,30]	(150,160]
177278	West	-4.61699480102548	48.3392154941234	7.50760272458205	27.6179711602568	145.484512485601	(7.4,7.6]	(20,30]	(140,150]
177279	West	-4.61699211102548	48.3392154941234	7.45694066128972	23.509338313564	152.240935230099	(7.4,7.6]	(20,30]	(150,160]
177280	West	-4.61698942102548	48.3392154941234	7.44192387803993	23.7972966627523	167.944938104613	(7.4,7.6]	(20,30]	(160,170]
177281	West	-4.61698673102548	48.3392154941234	7.44052712587105	26.0473498095314	169.603512219701	(7.4,7.6]	(20,30]	(160,170]
177282	West	-4.61698404102548	48.3392154941234	7.41394504282747	29.154022762698	160.306357341424	(7.4,7.6]	(20,30]	(160,170]
177283	West	-4.61698135102548	48.3392154941234	7.36562983783427	32.3022435621747	149.964312851795	(7.2,7.4]	(30,40]	(140,150]
177284	West	-4.61697866102548	48.3392154941234	7.2864187423072	32.7442715115906	148.031057840398	(7.2,7.4]	(30,40]	(140,150]
177285	West	-4.61697597102548	48.3392154941234	7.22932564871739	34.4398519628785	146.087596379203	(7.2,7.4]	(30,40]	(140,150]
177286	West	-4.61697328102548	48.3392154941234	7.12731309402641	36.5056460392454	144.418775539366	(7,7.2]	(30,40]	(140,150]
177287	West	-4.61697059102548	48.3392154941234	7.05088805630242	36.8156668113094	149.748042590961	(7,7.2]	(30,40]	(140,150]
177288	West	-4.61696790102548	48.3392154941234	6.99931484783843	40.3754058380998	143.680443189265	(6.8,7]	(40,50]	(140,150]
177289	West	-4.61696521102548	48.3392154941234	6.88587683644485	43.5582095784539	135.222780099182	(6.8,7]	(40,50]	(130,140]
177290	West	-4.61696252102548	48.3392154941234	6.70178521043136	40.2473677980108	143.789166119979	(6.6,6.8]	(40,50]	(140,150]
177291	West	-4.61695983102548	48.3392154941234	6.63078909083029	35.9682148129912	171.881962866017	(6.6,6.8]	(30,40]	(170,180]
177292	West	-4.61695714102548	48.3392154941234	6.62688793264925	33.3849584439868	203.924255353988	(6.6,6.8]	(30,40]	(200,210]
177293	West	-4.61695445102548	48.3392154941234	6.72367604037955	58.8734899018419	259.484157576765	(6.6,6.8]	(50,60]	(250,260]
177294	West	-4.61695176102548	48.3392154941234	7.33451045281957	67.6807392724427	268.394258963422	(7.2,7.4]	(60,70]	(260,270]
177295	West	-4.61694907102548	48.3392154941234	7.74622595945626	62.4106437701509	263.588556363962	(7.6,7.8]	(60,70]	(260,270]
177301	West	-4.61693293102548	48.3392154941234	7.94348543159744	69.5391391499065	166.440416278006	(7.8,8]	(60,70]	(160,170]
177302	West	-4.61693024102548	48.3392154941234	7.78897876425918	71.5578244233812	167.745356147814	(7.6,7.8]	(70,80]	(160,170]
177303	West	-4.61692755102548	48.3392154941234	7.59649259242054	69.7762856237143	160.60434842357	(7.4,7.6]	(60,70]	(160,170]
177304	West	-4.61692486102548	48.3392154941234	7.40409730508095	60.4390861104425	165.913003714487	(7.4,7.6]	(60,70]	(160,170]
177305	West	-4.61692217102548	48.3392154941234	7.44001374929165	42.0381314236989	199.859215613626	(7.4,7.6]	(40,50]	(190,200]
177306	West	-4.61691948102548	48.3392154941234	7.54073086359269	26.6952613805675	232.1461081516	(7.4,7.6]	(20,30]	(230,240]
177307	West	-4.61691679102548	48.3392154941234	7.60450503196516	12.4010151021644	219.023777738723	(7.6,7.8]	(10,20]	(210,220]
177308	West	-4.61691410102548	48.3392154941234	7.5711495265398	6.27333096940859	195.479713111022	(7.4,7.6]	(0,10]	(190,200]
177309	West	-4.61691141102548	48.3392154941234	7.62003834791265	12.9485156828577	266.127300572163	(7.6,7.8]	(10,20]	(260,270]
177310	West	-4.61690872102548	48.3392154941234	7.69935715957549	16.0749127090832	262.31485316219	(7.6,7.8]	(10,20]	(260,270]
177311	West	-4.61690603102548	48.3392154941234	7.75391327935964	15.5562702494746	226.423750040075	(7.6,7.8]	(10,20]	(220,230]
177312	West	-4.61690334102548	48.3392154941234	7.77163645071129	23.1596813144766	194.741752133547	(7.6,7.8]	(20,30]	(190,200]
177313	West	-4.61690065102548	48.3392154941234	7.78975962167967	35.6246077075258	184.437815123108	(7.6,7.8]	(30,40]	(180,190]
177314	West	-4.61689796102548	48.3392154941234	7.79069009648933	50.7629064734678	185.679144109381	(7.6,7.8]	(50,60]	(180,190]
177315	West	-4.61689527102548	48.3392154941234	7.80428661505909	59.6501123701789	181.543750307477	(7.8,8]	(50,60]	(180,190]
177316	West	-4.61689258102548	48.3392154941234	7.76239908490621	60.0876585466979	176.421182995485	(7.6,7.8]	(60,70]	(170,180]
177317	West	-4.61688989102548	48.3392154941234	7.79469555303445	55.1904422699221	190.243326886363	(7.6,7.8]	(50,60]	(190,200]
177318	West	-4.61688720102548	48.3392154941234	7.96875372071685	54.3654052214028	218.376224998038	(7.8,8]	(50,60]	(210,220]
177341	West	-4.61682533102548	48.3392154941234	7.94859781157682	66.2155736910762	160.291571308431	(7.8,8]	(60,70]	(160,170]
177342	West	-4.61682264102548	48.3392154941234	7.75551974692059	59.3328149239198	153.05333491793	(7.6,7.8]	(50,60]	(150,160]
177343	West	-4.61681995102548	48.3392154941234	7.62979574689347	44.0121753078302	146.005259670535	(7.6,7.8]	(40,50]	(140,150]
177344	West	-4.61681726102548	48.3392154941234	7.5408529134232	18.6148621280974	154.669259949955	(7.4,7.6]	(10,20]	(150,160]
177345	West	-4.61681457102548	48.3392154941234	7.5813424315416	6.45638541513244	218.144610492472	(7.4,7.6]	(0,10]	(210,220]
177346	West	-4.61681188102548	48.3392154941234	7.60669248546892	4.30398352930423	271.072091960498	(7.6,7.8]	(0,10]	(270,280]
177347	West	-4.61680919102548	48.3392154941234	7.63827683310693	8.1773618957523	280.716719846574	(7.6,7.8]	(0,10]	(280,290]
177348	West	-4.61680650102548	48.3392154941234	7.67623459799308	6.08648378146795	273.045872868316	(7.6,7.8]	(0,10]	(270,280]
177349	West	-4.61680381102548	48.3392154941234	7.66291541970487	3.06235441421975	301.191416651098	(7.6,7.8]	(0,10]	(300,310]
177350	West	-4.61680112102548	48.3392154941234	7.6580213967338	6.36519102488566	351.946835499824	(7.6,7.8]	(0,10]	(350,360]
177351	West	-4.61679843102548	48.3392154941234	7.67113193630012	9.82175174255625	24.7203464491111	(7.6,7.8]	(0,10]	(20,30]
177352	West	-4.61679574102548	48.3392154941234	7.65990007527986	15.2510865172196	68.5195741605769	(7.6,7.8]	(10,20]	(60,70]
177353	West	-4.61679305102548	48.3392154941234	7.58608419520936	19.4149817433418	89.171235291215	(7.4,7.6]	(10,20]	(80,90]
177354	West	-4.61679036102548	48.3392154941234	7.5132576386228	14.907288871144	121.72325065697	(7.4,7.6]	(10,20]	(120,130]
177355	West	-4.61678767102548	48.3392154941234	7.50451486378478	26.72680548942	149.524673024684	(7.4,7.6]	(20,30]	(140,150]
177356	West	-4.61678498102548	48.3392154941234	7.4135253520763	45.9124009144806	143.59066399389	(7.4,7.6]	(40,50]	(140,150]
177357	West	-4.61678229102548	48.3392154941234	7.28811998506579	62.3827392233917	137.569986445545	(7.2,7.4]	(60,70]	(130,140]
177358	West	-4.61677960102548	48.3392154941234	6.9679408619908	70.7482124640265	134.296627300086	(6.8,7]	(70,80]	(130,140]
177359	West	-4.61677691102548	48.3392154941234	6.40518290490237	70.527838678141	136.207257170178	(6.4,6.6]	(70,80]	(130,140]
177360	West	-4.61677422102548	48.3392154941234	6.09915177549123	60.9246139183625	144.955451490639	(6,6.2]	(60,70]	(140,150]
177361	West	-4.61677153102548	48.3392154941234	5.91850135428014	39.9740390038036	173.597240988198	(5.8,6]	(30,40]	(170,180]
177362	West	-4.61676884102548	48.3392154941234	6.02860785988855	39.7924106518913	226.483469037339	(6,6.2]	(30,40]	(220,230]
177363	West	-4.61676615102548	48.3392154941234	6.24992105955578	47.8494854647066	240.217865679739	(6.2,6.4]	(40,50]	(240,250]
177364	West	-4.61676346102548	48.3392154941234	6.45585562005131	58.9744824458385	251.93903551666	(6.4,6.6]	(50,60]	(250,260]
177365	West	-4.61676077102548	48.3392154941234	6.90276234163567	70.2601128509367	263.723410876337	(6.8,7]	(70,80]	(260,270]
177366	West	-4.61675808102548	48.3392154941234	7.60345865275718	64.1976109625711	269.225265949556	(7.6,7.8]	(60,70]	(260,270]
177367	West	-4.61675539102548	48.3392154941234	7.7378758111151	29.4653187280905	261.6280827003	(7.6,7.8]	(20,30]	(260,270]
177368	West	-4.61675270102548	48.3392154941234	7.83335823533106	24.7678685142962	229.49477942907	(7.8,8]	(20,30]	(220,230]
177369	West	-4.61675001102548	48.3392154941234	7.90396086534548	25.7950777366639	213.059412652486	(7.8,8]	(20,30]	(210,220]
177370	West	-4.61674732102548	48.3392154941234	7.95432494514428	27.1125645751327	200.689481250536	(7.8,8]	(20,30]	(200,210]
177371	West	-4.61674463102548	48.3392154941234	7.99912823242504	30.344443068631	182.114515461141	(7.8,8]	(30,40]	(180,190]
177372	West	-4.61674194102548	48.3392154941234	7.96205592191659	36.7355550152988	167.539869509946	(7.8,8]	(30,40]	(160,170]
177373	West	-4.61673925102548	48.3392154941234	7.8793825526798	44.4090018642046	169.756211920648	(7.8,8]	(40,50]	(160,170]
177374	West	-4.61673656102548	48.3392154941234	7.85672289494312	53.0531124446203	173.512278076638	(7.8,8]	(50,60]	(170,180]
177375	West	-4.61673387102548	48.3392154941234	7.828570363302	59.0889004453686	175.063417872023	(7.8,8]	(50,60]	(170,180]
177376	West	-4.61673118102548	48.3392154941234	7.80382563243883	61.5420509063292	171.694131815981	(7.8,8]	(60,70]	(170,180]
177377	West	-4.61672849102548	48.3392154941234	7.69553100301637	59.7415928862307	174.514713604006	(7.6,7.8]	(50,60]	(170,180]
177378	West	-4.61672580102548	48.3392154941234	7.72014055638056	52.9557248660402	177.899011899804	(7.6,7.8]	(50,60]	(170,180]
177379	West	-4.61672311102548	48.3392154941234	7.63988713853309	43.0582950920246	186.573847681047	(7.6,7.8]	(40,50]	(180,190]
177380	West	-4.61672042102548	48.3392154941234	7.75398010721854	30.1845989827958	201.780709401681	(7.6,7.8]	(30,40]	(200,210]
177381	West	-4.61671773102548	48.3392154941234	7.66896176367122	1.13987271970872	308.569149391402	(7.6,7.8]	(0,10]	(300,310]
177382	West	-4.61671504102548	48.3392154941234	7.65669892671838	35.7103290381532	327.613433707076	(7.6,7.8]	(30,40]	(320,330]
177383	West	-4.61671235102548	48.3392154941234	7.87061134666655	54.033595890464	315.443899077607	(7.8,8]	(50,60]	(310,320]
177504	West	-4.61638686102548	48.3392154941234	7.68425888059171	61.6334951443626	118.129476165972	(7.6,7.8]	(60,70]	(110,120]
177505	West	-4.61638417102548	48.3392154941234	7.4864440614543	61.2628226595556	134.257456840429	(7.4,7.6]	(60,70]	(130,140]
177506	West	-4.61638148102548	48.3392154941234	7.26231351610383	61.2835186443202	131.512391379995	(7.2,7.4]	(60,70]	(130,140]
177507	West	-4.61637879102548	48.3392154941234	6.8924114808003	43.6428708808731	126.534584126933	(6.8,7]	(40,50]	(120,130]
177508	West	-4.61637610102548	48.3392154941234	6.88172098502301	12.6188245284232	117.944777265595	(6.8,7]	(10,20]	(110,120]
177509	West	-4.61637341102548	48.3392154941234	6.83989183614325	26.633416407323	98.8861314367234	(6.8,7]	(20,30]	(90,100]
177510	West	-4.61637072102548	48.3392154941234	6.68529784008886	31.2021924618693	114.68891969718	(6.6,6.8]	(30,40]	(110,120]
177511	West	-4.61636803102548	48.3392154941234	6.61597384512403	26.8572159268616	138.635151722086	(6.6,6.8]	(20,30]	(130,140]
177512	West	-4.61636534102548	48.3392154941234	6.5563455846276	20.6609961657387	144.504726702483	(6.4,6.6]	(20,30]	(140,150]
177513	West	-4.61636265102548	48.3392154941234	6.53069484123626	8.89251878866544	143.473459141463	(6.4,6.6]	(0,10]	(140,150]
177514	West	-4.61635996102548	48.3392154941234	6.51347831049055	10.6126240172335	179.028570178577	(6.4,6.6]	(10,20]	(170,180]
177515	West	-4.61635727102548	48.3392154941234	6.48862195263527	35.1498104419316	197.500497722801	(6.4,6.6]	(30,40]	(190,200]
177516	West	-4.61635458102548	48.3392154941234	6.60230780606529	49.3474807197797	207.236856472163	(6.6,6.8]	(40,50]	(200,210]
177517	West	-4.61635189102548	48.3392154941234	6.75324151553024	49.4994782134201	209.748079432009	(6.6,6.8]	(40,50]	(200,210]
177518	West	-4.61634920102548	48.3392154941234	6.80803395230428	47.2797420150454	200.621876373647	(6.8,7]	(40,50]	(200,210]
177519	West	-4.61634651102548	48.3392154941234	6.88661352704748	49.9101706235399	194.604427269579	(6.8,7]	(40,50]	(190,200]
177520	West	-4.61634382102548	48.3392154941234	6.95096184744519	54.5552591982511	192.05186289072	(6.8,7]	(50,60]	(190,200]
177521	West	-4.61634113102548	48.3392154941234	7.00941309225087	58.6601787519087	186.580024542981	(7,7.2]	(50,60]	(180,190]
177522	West	-4.61633844102548	48.3392154941234	7.01907823320862	59.2354887978311	187.224557572139	(7,7.2]	(50,60]	(180,190]
177523	West	-4.61633575102548	48.3392154941234	7.06109870030968	54.4898513811048	184.970666265833	(7,7.2]	(50,60]	(180,190]
177524	West	-4.61633306102548	48.3392154941234	7.02463293009191	45.6868152080338	163.760809901822	(7,7.2]	(40,50]	(160,170]
177525	West	-4.61633037102548	48.3392154941234	6.91972156468499	44.2263745546594	124.282247310981	(6.8,7]	(40,50]	(120,130]
177526	West	-4.61632768102548	48.3392154941234	6.71105071026463	41.8482511008987	106.715345129863	(6.6,6.8]	(40,50]	(100,110]
177527	West	-4.61632499102548	48.3392154941234	6.57866481215802	38.6129634434479	104.284320575076	(6.4,6.6]	(30,40]	(100,110]
177528	West	-4.61632230102548	48.3392154941234	6.43373649598365	34.3607467637842	108.698869745948	(6.4,6.6]	(30,40]	(100,110]
177529	West	-4.61631961102548	48.3392154941234	6.39232808656269	10.3018124007547	149.346322340118	(6.2,6.4]	(10,20]	(140,150]
177530	West	-4.61631692102548	48.3392154941234	6.40048113524498	46.0213998983974	269.091936875451	(6.4,6.6]	(40,50]	(260,270]
177531	West	-4.61631423102548	48.3392154941234	6.79993043187674	62.0764636751122	266.707735287236	(6.6,6.8]	(60,70]	(260,270]
177532	West	-4.61631154102548	48.3392154941234	7.20521812812235	47.7306912461928	251.803616487905	(7.2,7.4]	(40,50]	(250,260]
177533	West	-4.61630885102548	48.3392154941234	7.23915715991218	19.7409188803232	174.45060897008	(7.2,7.4]	(10,20]	(170,180]
177534	West	-4.61630616102548	48.3392154941234	7.17038665783441	22.2185172038476	143.966862769765	(7,7.2]	(20,30]	(140,150]
178983	West	-4.61720193102548	48.3392137041234	7.90037125736126	57.1330182728937	138.129233240063	(7.8,8]	(50,60]	(130,140]
178984	West	-4.61719924102548	48.3392137041234	7.6940846107766	59.5852271391392	137.845322990687	(7.6,7.8]	(50,60]	(130,140]
178985	West	-4.61719655102548	48.3392137041234	7.47438754078363	62.8519286805094	140.415917586159	(7.4,7.6]	(60,70]	(140,150]
178986	West	-4.61719386102548	48.3392137041234	7.13755621943923	65.9010068420004	146.641976969481	(7,7.2]	(60,70]	(140,150]
178987	West	-4.61719117102548	48.3392137041234	6.8185930560654	67.2238428817009	158.269496136447	(6.8,7]	(60,70]	(150,160]
178988	West	-4.61718848102548	48.3392137041234	6.71273755139908	68.0287134168719	163.492742142474	(6.6,6.8]	(60,70]	(160,170]
178989	West	-4.61718579102548	48.3392137041234	6.61314450955192	69.6662801937417	152.867529437421	(6.6,6.8]	(60,70]	(150,160]
178990	West	-4.61718310102548	48.3392137041234	6.25145480499798	70.1894296681147	134.723867237124	(6.2,6.4]	(70,80]	(130,140]
178991	West	-4.61718041102548	48.3392137041234	5.74692784889174	43.8967857215051	123.040561685532	(5.6,5.8]	(40,50]	(120,130]
178992	West	-4.61717772102548	48.3392137041234	5.98069278069053	63.8744064682336	306.41678024724	(5.8,6]	(60,70]	(300,310]
178993	West	-4.61717503102548	48.3392137041234	6.56282307054706	73.3976274314255	306.343853333367	(6.4,6.6]	(70,80]	(300,310]
178994	West	-4.61717234102548	48.3392137041234	7.14898673694346	70.0772112541051	303.717225448822	(7,7.2]	(70,80]	(300,310]
178995	West	-4.61716965102548	48.3392137041234	7.46327309524156	59.7911995529611	283.752370028678	(7.4,7.6]	(50,60]	(280,290]
178996	West	-4.61716696102548	48.3392137041234	7.74558827300983	67.0379098119819	257.071801716743	(7.6,7.8]	(60,70]	(250,260]
179054	West	-4.61701094102548	48.3392137041234	7.85420140841222	33.7338038607891	139.048504437726	(7.8,8]	(30,40]	(130,140]
179055	West	-4.61700825102548	48.3392137041234	7.71677354293071	37.6326912278341	143.098844602642	(7.6,7.8]	(30,40]	(140,150]
179056	West	-4.61700556102548	48.3392137041234	7.62996388545661	34.4288118632138	147.825417806141	(7.6,7.8]	(30,40]	(140,150]
179057	West	-4.61700287102548	48.3392137041234	7.55391009147085	27.138262261478	149.110017693038	(7.4,7.6]	(20,30]	(140,150]
179058	West	-4.61700018102548	48.3392137041234	7.5326161535186	22.0769099759006	153.033591762834	(7.4,7.6]	(20,30]	(150,160]
179059	West	-4.61699749102548	48.3392137041234	7.50158583206359	21.3921641716529	146.701422961095	(7.4,7.6]	(20,30]	(140,150]
179060	West	-4.61699480102548	48.3392137041234	7.46389453352743	21.4143522799192	142.311781811309	(7.4,7.6]	(20,30]	(140,150]
179061	West	-4.61699211102548	48.3392137041234	7.41703919870423	23.4123311169466	144.131607434039	(7.4,7.6]	(20,30]	(140,150]
179062	West	-4.61698942102548	48.3392137041234	7.35599481374969	25.2180126795379	158.380389753342	(7.2,7.4]	(20,30]	(150,160]
179063	West	-4.61698673102548	48.3392137041234	7.33570593529362	29.1256400464259	164.032065688647	(7.2,7.4]	(20,30]	(160,170]
179064	West	-4.61698404102548	48.3392137041234	7.29900456472499	32.9907893432851	158.695220726637	(7.2,7.4]	(30,40]	(150,160]
179065	West	-4.61698135102548	48.3392137041234	7.24046941834782	34.0734138285663	154.180150660817	(7.2,7.4]	(30,40]	(150,160]
179066	West	-4.61697866102548	48.3392137041234	7.17751150163915	33.5502530045813	150.339235453253	(7,7.2]	(30,40]	(150,160]
179067	West	-4.61697597102548	48.3392137041234	7.10414807898998	34.8858595161287	144.213642790273	(7,7.2]	(30,40]	(140,150]
179068	West	-4.61697328102548	48.3392137041234	7.01489530842246	38.8156089639696	141.449865025073	(7,7.2]	(30,40]	(140,150]
179069	West	-4.61697059102548	48.3392137041234	6.93081433572228	43.0221945838045	147.213528863613	(6.8,7]	(40,50]	(140,150]
179070	West	-4.61696790102548	48.3392137041234	6.81617959995979	45.5598283910685	149.924226614352	(6.8,7]	(40,50]	(140,150]
179071	West	-4.61696521102548	48.3392137041234	6.6907745225899	44.0525049388953	144.661667718695	(6.6,6.8]	(40,50]	(140,150]
179072	West	-4.61696252102548	48.3392137041234	6.59252052404802	35.4838821387106	144.698937404318	(6.4,6.6]	(30,40]	(140,150]
179073	West	-4.61695983102548	48.3392137041234	6.52930557691716	19.6929215625601	179.486878149928	(6.4,6.6]	(10,20]	(170,180]
179074	West	-4.61695714102548	48.3392137041234	6.57617136434286	25.7680927012768	245.277209124061	(6.4,6.6]	(20,30]	(240,250]
179075	West	-4.61695445102548	48.3392137041234	6.75072329729435	58.4466308550261	256.754041106188	(6.6,6.8]	(50,60]	(250,260]
179076	West	-4.61695176102548	48.3392137041234	7.30100769077795	67.5189082362348	250.431523327443	(7.2,7.4]	(60,70]	(250,260]
179077	West	-4.61694907102548	48.3392137041234	7.71601694929535	62.7430981634543	231.619555148467	(7.6,7.8]	(60,70]	(230,240]
179078	West	-4.61694638102548	48.3392137041234	7.89087863796278	60.6850575352522	202.699956307253	(7.8,8]	(60,70]	(200,210]
179079	West	-4.61694369102548	48.3392137041234	7.97110071404805	65.2427639377087	182.636178256073	(7.8,8]	(60,70]	(180,190]
179080	West	-4.61694100102548	48.3392137041234	7.90321035996534	69.146756789305	169.749489254757	(7.8,8]	(60,70]	(160,170]
179081	West	-4.61693831102548	48.3392137041234	7.72495140422396	70.3628987990345	165.088047956844	(7.6,7.8]	(70,80]	(160,170]
179082	West	-4.61693562102548	48.3392137041234	7.59637296086282	69.6688234516422	162.776752468634	(7.4,7.6]	(60,70]	(160,170]
179083	West	-4.61693293102548	48.3392137041234	7.31226669012323	67.868541305807	161.367716333782	(7.2,7.4]	(60,70]	(160,170]
179084	West	-4.61693024102548	48.3392137041234	7.13851721448329	63.6438945118117	167.306408910649	(7,7.2]	(60,70]	(160,170]
179085	West	-4.61692755102548	48.3392137041234	7.13870830217966	56.6365224927514	170.259906003619	(7,7.2]	(50,60]	(170,180]
179086	West	-4.61692486102548	48.3392137041234	7.1123793470715	44.8429930855758	199.128759366946	(7,7.2]	(40,50]	(190,200]
179087	West	-4.61692217102548	48.3392137041234	7.32000084540909	45.5567750634669	246.115639072184	(7.2,7.4]	(40,50]	(240,250]
179088	West	-4.61691948102548	48.3392137041234	7.53565927936179	30.4241363622521	255.067705651701	(7.4,7.6]	(30,40]	(250,260]
179089	West	-4.61691679102548	48.3392137041234	7.58264536279005	10.5610020241782	238.817557926825	(7.4,7.6]	(10,20]	(230,240]
179090	West	-4.61691410102548	48.3392137041234	7.61351093821359	9.95818043739398	272.185966718322	(7.6,7.8]	(0,10]	(270,280]
179091	West	-4.61691141102548	48.3392137041234	7.64380146601389	12.2516503281338	282.218221472056	(7.6,7.8]	(10,20]	(280,290]
179092	West	-4.61690872102548	48.3392137041234	7.68620125403246	9.75436580977982	240.171556725257	(7.6,7.8]	(0,10]	(240,250]
179093	West	-4.61690603102548	48.3392137041234	7.7008322228998	13.6179221412883	187.553547672738	(7.6,7.8]	(10,20]	(180,190]
179094	West	-4.61690334102548	48.3392137041234	7.68954740539874	20.9598952509131	168.506991531322	(7.6,7.8]	(20,30]	(160,170]
179095	West	-4.61690065102548	48.3392137041234	7.66100630817069	31.2550113551421	156.744092720254	(7.6,7.8]	(30,40]	(150,160]
179096	West	-4.61689796102548	48.3392137041234	7.56718426988453	39.7450495693856	158.764172991849	(7.4,7.6]	(30,40]	(150,160]
179097	West	-4.61689527102548	48.3392137041234	7.49134336824828	43.390024336532	169.556853611526	(7.4,7.6]	(40,50]	(160,170]
179098	West	-4.61689258102548	48.3392137041234	7.49675984705266	44.1342583439533	182.483932179338	(7.4,7.6]	(40,50]	(180,190]
179099	West	-4.61688989102548	48.3392137041234	7.52809390114673	46.2836337440541	205.248559410674	(7.4,7.6]	(40,50]	(200,210]
179100	West	-4.61688720102548	48.3392137041234	7.63339304988066	54.0877431894699	231.260264263692	(7.6,7.8]	(50,60]	(230,240]
179101	West	-4.61688451102548	48.3392137041234	7.97534320871918	57.9244446252049	241.630749979185	(7.8,8]	(50,60]	(240,250]
179114	West	-4.61684954102548	48.3392137041234	7.93550037728425	64.3930603630719	162.565714803008	(7.8,8]	(60,70]	(160,170]
179115	West	-4.61684685102548	48.3392137041234	7.85369131833372	67.1321867218775	174.775126021975	(7.8,8]	(60,70]	(170,180]
179116	West	-4.61684416102548	48.3392137041234	7.8850820173026	68.8968192295713	179.30179979591	(7.8,8]	(60,70]	(170,180]
179117	West	-4.61684147102548	48.3392137041234	7.88109706469376	70.259291762361	178.206139353055	(7.8,8]	(70,80]	(170,180]
179118	West	-4.61683878102548	48.3392137041234	7.82701702874283	70.947448871274	174.524360825577	(7.8,8]	(70,80]	(170,180]
179119	West	-4.61683609102548	48.3392137041234	7.7075347015801	70.6432465453986	173.503338484056	(7.6,7.8]	(70,80]	(170,180]
179120	West	-4.61683340102548	48.3392137041234	7.63233707205222	69.7215847269262	174.65436553434	(7.6,7.8]	(60,70]	(170,180]
179121	West	-4.61683071102548	48.3392137041234	7.54051906845107	67.6606116528451	174.809070799168	(7.4,7.6]	(60,70]	(170,180]
179122	West	-4.61682802102548	48.3392137041234	7.49112050624425	61.7000771363265	176.101516617693	(7.4,7.6]	(60,70]	(170,180]
179123	West	-4.61682533102548	48.3392137041234	7.5061097041252	50.1074518488458	170.364823902629	(7.4,7.6]	(50,60]	(170,180]
179124	West	-4.61682264102548	48.3392137041234	7.50933159915511	38.4234738024619	160.164750780419	(7.4,7.6]	(30,40]	(160,170]
179125	West	-4.61681995102548	48.3392137041234	7.50512194643155	25.616669205156	171.972321380439	(7.4,7.6]	(20,30]	(170,180]
179126	West	-4.61681726102548	48.3392137041234	7.56128209913154	16.896116421093	189.616356432448	(7.4,7.6]	(10,20]	(180,190]
179127	West	-4.61681457102548	48.3392137041234	7.56459310593956	17.5447156902648	195.405763808492	(7.4,7.6]	(10,20]	(190,200]
179128	West	-4.61681188102548	48.3392137041234	7.59590494869484	21.2427719658216	191.096346692928	(7.4,7.6]	(20,30]	(190,200]
179129	West	-4.61680919102548	48.3392137041234	7.59433527428641	24.111044019755	195.074014810749	(7.4,7.6]	(20,30]	(190,200]
179130	West	-4.61680650102548	48.3392137041234	7.63205608902891	23.8975491235727	194.963912226242	(7.6,7.8]	(20,30]	(190,200]
179131	West	-4.61680381102548	48.3392137041234	7.64453025987855	23.1433646751714	188.798762534071	(7.6,7.8]	(20,30]	(180,190]
179132	West	-4.61680112102548	48.3392137041234	7.71410364679605	26.9755843430308	179.12748450398	(7.6,7.8]	(20,30]	(170,180]
179133	West	-4.61679843102548	48.3392137041234	7.68687115876022	34.4475730668391	166.533793289376	(7.6,7.8]	(30,40]	(160,170]
179134	West	-4.61679574102548	48.3392137041234	7.65352230336716	43.6674389198509	154.233757285941	(7.6,7.8]	(40,50]	(150,160]
179135	West	-4.61679305102548	48.3392137041234	7.52551530048732	47.0492995401771	157.239180485361	(7.4,7.6]	(40,50]	(150,160]
179136	West	-4.61679036102548	48.3392137041234	7.48896197712807	49.9288374955942	158.997735469952	(7.4,7.6]	(40,50]	(150,160]
179137	West	-4.61678767102548	48.3392137041234	7.34254305982169	56.3142485589039	156.081598959343	(7.2,7.4]	(50,60]	(150,160]
179138	West	-4.61678498102548	48.3392137041234	7.23685802678155	64.3381777710944	149.142869934514	(7.2,7.4]	(60,70]	(140,150]
179139	West	-4.61678229102548	48.3392137041234	6.90535223907176	71.3392006864542	140.178708032807	(6.8,7]	(70,80]	(140,150]
179140	West	-4.61677960102548	48.3392137041234	6.36218273244314	71.7503671244185	138.287479871829	(6.2,6.4]	(70,80]	(130,140]
179141	West	-4.61677691102548	48.3392137041234	5.98390748542221	62.6368903630574	139.806284772357	(5.8,6]	(60,70]	(130,140]
179142	West	-4.61677422102548	48.3392137041234	5.81204099183194	24.2289069908738	162.415757819048	(5.8,6]	(20,30]	(160,170]
179143	West	-4.61677153102548	48.3392137041234	5.95949388345024	23.1582720147962	308.301320400022	(5.8,6]	(20,30]	(300,310]
179144	West	-4.61676884102548	48.3392137041234	6.00316154874277	21.4257872905489	297.342031482285	(6,6.2]	(20,30]	(290,300]
179145	West	-4.61676615102548	48.3392137041234	6.11949116177903	39.441797657678	249.170360626881	(6,6.2]	(30,40]	(240,250]
179146	West	-4.61676346102548	48.3392137041234	6.34848917297378	59.5669845131519	254.402687564302	(6.2,6.4]	(50,60]	(250,260]
179147	West	-4.61676077102548	48.3392137041234	6.74239510737858	71.3084808744881	261.077084197076	(6.6,6.8]	(70,80]	(260,270]
179148	West	-4.61675808102548	48.3392137041234	7.55608457034027	64.8111081705083	253.088202089643	(7.4,7.6]	(60,70]	(250,260]
179149	West	-4.61675539102548	48.3392137041234	7.62337512487079	41.6434204004867	202.121574535204	(7.6,7.8]	(40,50]	(200,210]
179150	West	-4.61675270102548	48.3392137041234	7.65883727600972	43.8344222923685	195.607646190428	(7.6,7.8]	(40,50]	(190,200]
179151	West	-4.61675001102548	48.3392137041234	7.67686000438169	44.8560638162869	191.719184282121	(7.6,7.8]	(40,50]	(190,200]
179152	West	-4.61674732102548	48.3392137041234	7.72409748038581	47.804871444311	182.164927356355	(7.6,7.8]	(40,50]	(180,190]
179153	West	-4.61674463102548	48.3392137041234	7.69089068719231	51.7929176249977	175.15375754054	(7.6,7.8]	(50,60]	(170,180]
179154	West	-4.61674194102548	48.3392137041234	7.68446071840109	54.5642746428125	168.312428494174	(7.6,7.8]	(50,60]	(160,170]
179155	West	-4.61673925102548	48.3392137041234	7.61770340989213	57.3816013677256	164.627982914487	(7.6,7.8]	(50,60]	(160,170]
179156	West	-4.61673656102548	48.3392137041234	7.52959952873286	60.1512438191489	165.270673358546	(7.4,7.6]	(60,70]	(160,170]
179157	West	-4.61673387102548	48.3392137041234	7.38765067521289	61.9977750375803	169.19063703345	(7.2,7.4]	(60,70]	(160,170]
179158	West	-4.61673118102548	48.3392137041234	7.35787299174952	61.0705232585312	174.5296072748	(7.2,7.4]	(60,70]	(170,180]
179159	West	-4.61672849102548	48.3392137041234	7.29065898427405	54.903644799721	190.551126361962	(7.2,7.4]	(50,60]	(190,200]
179160	West	-4.61672580102548	48.3392137041234	7.4234084926891	43.2529218434398	213.258054813153	(7.4,7.6]	(40,50]	(210,220]
179161	West	-4.61672311102548	48.3392137041234	7.4979711631199	29.2673957923226	249.822862970578	(7.4,7.6]	(20,30]	(240,250]
179162	West	-4.61672042102548	48.3392137041234	7.59771906322529	39.4660936228524	296.322491071168	(7.4,7.6]	(30,40]	(290,300]
179163	West	-4.61671773102548	48.3392137041234	7.82505979694112	49.6420190810134	326.287013407942	(7.8,8]	(40,50]	(320,330]
179164	West	-4.61671504102548	48.3392137041234	7.96051228463696	55.8784079171314	332.915005584004	(7.8,8]	(50,60]	(330,340]
179286	West	-4.61638686102548	48.3392137041234	7.58697923452609	66.2740622662327	98.4176623167212	(7.4,7.6]	(60,70]	(90,100]
179287	West	-4.61638417102548	48.3392137041234	7.1815411864059	64.9878587562085	120.700209631107	(7,7.2]	(60,70]	(120,130]
179288	West	-4.61638148102548	48.3392137041234	6.81197068772894	54.8863837934162	144.362895469536	(6.8,7]	(50,60]	(140,150]
179289	West	-4.61637879102548	48.3392137041234	6.89416987234543	34.1921729710579	165.447622207965	(6.8,7]	(30,40]	(160,170]
179290	West	-4.61637610102548	48.3392137041234	6.88387991063223	27.4420455461577	161.139478665715	(6.8,7]	(20,30]	(160,170]
179291	West	-4.61637341102548	48.3392137041234	6.85421510954163	35.2092658652761	134.617608729181	(6.8,7]	(30,40]	(130,140]
179292	West	-4.61637072102548	48.3392137041234	6.64254770797094	34.8067916612002	121.884217084384	(6.6,6.8]	(30,40]	(120,130]
179293	West	-4.61636803102548	48.3392137041234	6.54427787575993	23.8951314913151	130.031080043652	(6.4,6.6]	(20,30]	(130,140]
179294	West	-4.61636534102548	48.3392137041234	6.50015029533126	18.1816782128134	152.965860225006	(6.4,6.6]	(10,20]	(150,160]
179295	West	-4.61636265102548	48.3392137041234	6.51795706871185	15.4210460811656	187.599489470762	(6.4,6.6]	(10,20]	(180,190]
179296	West	-4.61635996102548	48.3392137041234	6.54966560415025	13.8447539837245	148.101734338035	(6.4,6.6]	(10,20]	(140,150]
179297	West	-4.61635727102548	48.3392137041234	6.4279240770546	16.868677981648	143.958823108051	(6.4,6.6]	(10,20]	(140,150]
179298	West	-4.61635458102548	48.3392137041234	6.37566978307092	30.1171609363862	214.942442819089	(6.2,6.4]	(30,40]	(210,220]
179299	West	-4.61635189102548	48.3392137041234	6.5533013802492	42.449625224047	215.947091021927	(6.4,6.6]	(40,50]	(210,220]
179300	West	-4.61634920102548	48.3392137041234	6.68182544516262	43.4926457826259	195.682825720016	(6.6,6.8]	(40,50]	(190,200]
179301	West	-4.61634651102548	48.3392137041234	6.6766462664824	45.8845054863731	190.578832193598	(6.6,6.8]	(40,50]	(190,200]
179302	West	-4.61634382102548	48.3392137041234	6.71663444912822	47.2440678144032	186.357820160969	(6.6,6.8]	(40,50]	(180,190]
179303	West	-4.61634113102548	48.3392137041234	6.67058962205962	46.8535179200474	186.48365994659	(6.6,6.8]	(40,50]	(180,190]
179304	West	-4.61633844102548	48.3392137041234	6.71129628544757	44.443513822511	204.961153951552	(6.6,6.8]	(40,50]	(200,210]
179305	West	-4.61633575102548	48.3392137041234	6.84626854037913	37.8483438594299	213.151603253868	(6.8,7]	(30,40]	(210,220]
179306	West	-4.61633306102548	48.3392137041234	6.9573335239204	24.2761369151724	182.454706859745	(6.8,7]	(20,30]	(180,190]
179307	West	-4.61633037102548	48.3392137041234	6.93145607737679	28.955267640911	118.075257538742	(6.8,7]	(20,30]	(110,120]
179308	West	-4.61632768102548	48.3392137041234	6.8032047565542	37.4782552155326	99.7918491149449	(6.8,7]	(30,40]	(90,100]
179309	West	-4.61632499102548	48.3392137041234	6.64703919158656	42.2203332635222	102.726505340886	(6.6,6.8]	(40,50]	(100,110]
179310	West	-4.61632230102548	48.3392137041234	6.45472911829029	41.0445674189436	118.12532196628	(6.4,6.6]	(40,50]	(110,120]
179311	West	-4.61631961102548	48.3392137041234	6.30977279616664	20.5373723849991	205.704820601327	(6.2,6.4]	(20,30]	(200,210]
179312	West	-4.61631692102548	48.3392137041234	6.47190995515173	51.5675040999672	270.200742749073	(6.4,6.6]	(50,60]	(270,280]
179313	West	-4.61631423102548	48.3392137041234	6.78025427021656	55.4555582580444	265.396250195009	(6.6,6.8]	(50,60]	(260,270]
179314	West	-4.61631154102548	48.3392137041234	7.04109164030459	44.1515413778003	230.566110984931	(7,7.2]	(40,50]	(230,240]
179315	West	-4.61630885102548	48.3392137041234	7.11283503858534	38.5349591465177	185.151959889196	(7,7.2]	(30,40]	(180,190]
179316	West	-4.61630616102548	48.3392137041234	7.09785021260433	38.8547148379978	159.541262686004	(7,7.2]	(30,40]	(150,160]
180764	West	-4.61720462102548	48.3392119141234	7.88049515240905	54.5008373302222	140.476883678662	(7.8,8]	(50,60]	(140,150]
180765	West	-4.61720193102548	48.3392119141234	7.696440784317	58.376957903866	136.202698931777	(7.6,7.8]	(50,60]	(130,140]
180766	West	-4.61719924102548	48.3392119141234	7.4421342109258	62.6182031928918	135.23805677047	(7.4,7.6]	(60,70]	(130,140]
180767	West	-4.61719655102548	48.3392119141234	7.14206743372719	63.3440450605158	137.161230313807	(7,7.2]	(60,70]	(130,140]
180768	West	-4.61719386102548	48.3392119141234	6.88926962897091	61.4361607845049	134.559079092253	(6.8,7]	(60,70]	(130,140]
180769	West	-4.61719117102548	48.3392119141234	6.65061795749099	57.6023470810965	138.674009840341	(6.6,6.8]	(50,60]	(130,140]
180770	West	-4.61718848102548	48.3392119141234	6.50724533688411	61.6872771309722	145.464602282927	(6.4,6.6]	(60,70]	(140,150]
180771	West	-4.61718579102548	48.3392119141234	6.27017801479132	64.4749349845417	147.141918050821	(6.2,6.4]	(60,70]	(140,150]
180772	West	-4.61718310102548	48.3392119141234	5.99403563509826	39.7820233262498	141.420204996204	(5.8,6]	(30,40]	(140,150]
180773	West	-4.61718041102548	48.3392119141234	5.91540266179496	56.5669086218581	320.311902280366	(5.8,6]	(50,60]	(320,330]
180774	West	-4.61717772102548	48.3392119141234	6.40438239699056	72.3101118172776	309.540001727517	(6.4,6.6]	(70,80]	(300,310]
180775	West	-4.61717503102548	48.3392119141234	6.99775919028481	71.2710665715908	305.299232332947	(6.8,7]	(70,80]	(300,310]
180776	West	-4.61717234102548	48.3392119141234	7.41048371033806	60.1908054245393	304.841773419136	(7.4,7.6]	(60,70]	(300,310]
180777	West	-4.61716965102548	48.3392119141234	7.53996694697416	41.6429515464271	295.483883218126	(7.4,7.6]	(40,50]	(290,300]
180778	West	-4.61716696102548	48.3392119141234	7.63750431711433	62.3607491263497	271.639664612288	(7.6,7.8]	(60,70]	(270,280]
180832	West	-4.61702170102548	48.3392119141234	7.9626280490983	10.8278494674314	150.962006503826	(7.8,8]	(10,20]	(150,160]
180833	West	-4.61701901102548	48.3392119141234	7.93569012741476	24.9859126276819	145.29341060851	(7.8,8]	(20,30]	(140,150]
180834	West	-4.61701632102548	48.3392119141234	7.86483479761092	33.2553897803961	150.938259949561	(7.8,8]	(30,40]	(150,160]
180835	West	-4.61701363102548	48.3392119141234	7.79485477463048	38.2716212148107	153.596453213904	(7.6,7.8]	(30,40]	(150,160]
180836	West	-4.61701094102548	48.3392119141234	7.71163550769553	40.7146425857975	146.611532342694	(7.6,7.8]	(40,50]	(140,150]
180837	West	-4.61700825102548	48.3392119141234	7.58643650524323	34.3551329902865	145.675140240247	(7.4,7.6]	(30,40]	(140,150]
180838	West	-4.61700556102548	48.3392119141234	7.5372336780217	22.4819479188147	150.564733537239	(7.4,7.6]	(20,30]	(150,160]
180839	West	-4.61700287102548	48.3392119141234	7.51752203355262	18.4817332690359	144.089872140597	(7.4,7.6]	(10,20]	(140,150]
180840	West	-4.61700018102548	48.3392119141234	7.47732120262832	21.1142817051092	145.324860510326	(7.4,7.6]	(20,30]	(140,150]
180841	West	-4.61699749102548	48.3392119141234	7.43319910144402	24.0950263219837	150.833423296934	(7.4,7.6]	(20,30]	(150,160]
180842	West	-4.61699480102548	48.3392119141234	7.39198873403946	26.9015137955552	148.774988247222	(7.2,7.4]	(20,30]	(140,150]
180843	West	-4.61699211102548	48.3392119141234	7.32317515425501	29.2031855117958	146.922642439358	(7.2,7.4]	(20,30]	(140,150]
180844	West	-4.61698942102548	48.3392119141234	7.26947192535986	29.1164266113467	154.270330147951	(7.2,7.4]	(20,30]	(150,160]
180845	West	-4.61698673102548	48.3392119141234	7.22594624471353	31.0587308902705	157.048588215649	(7.2,7.4]	(30,40]	(150,160]
180846	West	-4.61698404102548	48.3392119141234	7.1673490646478	33.4110979431799	155.834765285896	(7,7.2]	(30,40]	(150,160]
180847	West	-4.61698135102548	48.3392119141234	7.11572468073827	33.0369564564524	156.521669980358	(7,7.2]	(30,40]	(150,160]
180848	West	-4.61697866102548	48.3392119141234	7.06875670054063	34.0772545120794	151.094068974723	(7,7.2]	(30,40]	(150,160]
180849	West	-4.61697597102548	48.3392119141234	7.00209787191401	38.4096540473522	144.973796816737	(7,7.2]	(30,40]	(140,150]
180850	West	-4.61697328102548	48.3392119141234	6.90383753605205	42.4385599927927	140.877818971319	(6.8,7]	(40,50]	(140,150]
180851	West	-4.61697059102548	48.3392119141234	6.72886266365241	42.3725315838473	140.561261344396	(6.6,6.8]	(40,50]	(140,150]
180852	West	-4.61696790102548	48.3392119141234	6.62453552569701	39.1530775110365	143.492154523964	(6.6,6.8]	(30,40]	(140,150]
180853	West	-4.61696521102548	48.3392119141234	6.56018218275334	36.6346489261237	143.786425269859	(6.4,6.6]	(30,40]	(140,150]
180854	West	-4.61696252102548	48.3392119141234	6.47830428756597	27.6203549678505	156.676236612799	(6.4,6.6]	(20,30]	(150,160]
180855	West	-4.61695983102548	48.3392119141234	6.48222347200289	19.5812386676917	214.157161825105	(6.4,6.6]	(10,20]	(210,220]
180856	West	-4.61695714102548	48.3392119141234	6.58079576812824	25.8627650021938	223.582770805507	(6.4,6.6]	(20,30]	(220,230]
180857	West	-4.61695445102548	48.3392119141234	6.6447450102699	52.9593336790728	224.021298414181	(6.6,6.8]	(50,60]	(220,230]
180858	West	-4.61695176102548	48.3392119141234	6.9476443175077	67.7994175820498	224.021936162802	(6.8,7]	(60,70]	(220,230]
180859	West	-4.61694907102548	48.3392119141234	7.31733637893506	68.4399951115783	210.57932826422	(7.2,7.4]	(60,70]	(210,220]
180860	West	-4.61694638102548	48.3392119141234	7.43088564772976	66.8631113254	188.650243247954	(7.4,7.6]	(60,70]	(180,190]
180861	West	-4.61694369102548	48.3392119141234	7.40122779184846	68.1455830807027	174.21619345603	(7.4,7.6]	(60,70]	(170,180]
180862	West	-4.61694100102548	48.3392119141234	7.29194610623179	68.3441956737615	168.186955518808	(7.2,7.4]	(60,70]	(160,170]
180863	West	-4.61693831102548	48.3392119141234	7.15121108805182	64.4566891277404	169.260594584831	(7,7.2]	(60,70]	(160,170]
180864	West	-4.61693562102548	48.3392119141234	7.04987287345988	54.6388640896958	166.836230353111	(7,7.2]	(50,60]	(160,170]
180865	West	-4.61693293102548	48.3392119141234	7.00555764761041	38.047108567977	153.491427847126	(7,7.2]	(30,40]	(150,160]
180866	West	-4.61693024102548	48.3392119141234	7.00056771845364	20.639037937957	154.453677390141	(7,7.2]	(20,30]	(150,160]
180867	West	-4.61692755102548	48.3392119141234	6.99342223292177	13.6343175680097	187.143848054436	(6.8,7]	(10,20]	(180,190]
180868	West	-4.61692486102548	48.3392119141234	7.02859033748948	34.0019070997997	254.143460192675	(7,7.2]	(30,40]	(250,260]
180869	West	-4.61692217102548	48.3392119141234	7.30628038943443	49.2812170365142	261.702051930252	(7.2,7.4]	(40,50]	(260,270]
180870	West	-4.61691948102548	48.3392119141234	7.53000612761485	31.1277075715191	249.354547038315	(7.4,7.6]	(30,40]	(240,250]
180871	West	-4.61691679102548	48.3392119141234	7.52007722213538	18.3366670662316	201.478624089035	(7.4,7.6]	(10,20]	(200,210]
180872	West	-4.61691410102548	48.3392119141234	7.59787827617112	25.321270961312	204.157620499052	(7.4,7.6]	(20,30]	(200,210]
180873	West	-4.61691141102548	48.3392119141234	7.66161276540855	29.2789483690139	192.058556161419	(7.6,7.8]	(20,30]	(190,200]
180874	West	-4.61690872102548	48.3392119141234	7.66224894702194	32.2805116014248	182.846880583342	(7.6,7.8]	(30,40]	(180,190]
180875	West	-4.61690603102548	48.3392119141234	7.65115866862545	33.8965389394906	176.287730310942	(7.6,7.8]	(30,40]	(170,180]
180876	West	-4.61690334102548	48.3392119141234	7.63398773609683	34.0466864256033	169.046443461488	(7.6,7.8]	(30,40]	(160,170]
180877	West	-4.61690065102548	48.3392119141234	7.57342546448144	33.3324542111426	153.437908783594	(7.4,7.6]	(30,40]	(150,160]
180878	West	-4.61689796102548	48.3392119141234	7.47805614944864	31.2882678455495	143.344697726298	(7.4,7.6]	(30,40]	(140,150]
180879	West	-4.61689527102548	48.3392119141234	7.41860698076171	27.1731632609014	152.966724365066	(7.4,7.6]	(20,30]	(150,160]
180880	West	-4.61689258102548	48.3392119141234	7.37434004074644	28.1536063034612	178.637630618004	(7.2,7.4]	(20,30]	(170,180]
180881	West	-4.61688989102548	48.3392119141234	7.4216555725185	37.7129110429827	210.7435535946	(7.4,7.6]	(30,40]	(210,220]
180882	West	-4.61688720102548	48.3392119141234	7.60508740055979	53.0607238903046	229.557616870177	(7.6,7.8]	(50,60]	(220,230]
180883	West	-4.61688451102548	48.3392119141234	7.8845333124227	59.9341406874205	221.851327182215	(7.8,8]	(50,60]	(220,230]
180895	West	-4.61685223102548	48.3392119141234	7.86132503713752	62.8936312525221	147.003509742948	(7.8,8]	(60,70]	(140,150]
180896	West	-4.61684954102548	48.3392119141234	7.60776410455286	62.7440420532346	153.483099475489	(7.6,7.8]	(60,70]	(150,160]
180897	West	-4.61684685102548	48.3392119141234	7.46908356506684	62.4337595109996	165.987304119852	(7.4,7.6]	(60,70]	(160,170]
180898	West	-4.61684416102548	48.3392119141234	7.38556532788079	64.4642371402503	173.622130962195	(7.2,7.4]	(60,70]	(170,180]
180899	West	-4.61684147102548	48.3392119141234	7.33534878392095	64.9941195279914	176.297786464364	(7.2,7.4]	(60,70]	(170,180]
180900	West	-4.61683878102548	48.3392119141234	7.30149940888233	63.0399543977556	175.802265296466	(7.2,7.4]	(60,70]	(170,180]
180901	West	-4.61683609102548	48.3392119141234	7.28473413344721	58.461580530317	177.548661657464	(7.2,7.4]	(50,60]	(170,180]
180902	West	-4.61683340102548	48.3392119141234	7.28679327807693	50.2803177146386	182.436708983955	(7.2,7.4]	(50,60]	(180,190]
180903	West	-4.61683071102548	48.3392119141234	7.30965360131929	39.1722374387191	190.228451999088	(7.2,7.4]	(30,40]	(190,200]
180904	West	-4.61682802102548	48.3392119141234	7.4087677183235	32.5984806391204	210.779043764723	(7.4,7.6]	(30,40]	(210,220]
180905	West	-4.61682533102548	48.3392119141234	7.53921759620607	24.1643953117158	197.863077034777	(7.4,7.6]	(20,30]	(190,200]
180906	West	-4.61682264102548	48.3392119141234	7.46864787056716	20.9361804087531	162.574824905366	(7.4,7.6]	(20,30]	(160,170]
180907	West	-4.61681995102548	48.3392119141234	7.43137646398664	19.4567062544689	190.8104985224	(7.4,7.6]	(10,20]	(190,200]
180908	West	-4.61681726102548	48.3392119141234	7.47278713879315	21.9305049521982	185.465636385222	(7.4,7.6]	(20,30]	(180,190]
180909	West	-4.61681457102548	48.3392119141234	7.44168792744179	26.0246395762571	180.484118674531	(7.4,7.6]	(20,30]	(180,190]
180910	West	-4.61681188102548	48.3392119141234	7.47144436244399	30.6561825418685	177.590013646448	(7.4,7.6]	(30,40]	(170,180]
180911	West	-4.61680919102548	48.3392119141234	7.44440512898566	36.8674734418814	180.682899238577	(7.4,7.6]	(30,40]	(180,190]
180912	West	-4.61680650102548	48.3392119141234	7.51494490969615	40.6313760739603	188.572453655338	(7.4,7.6]	(40,50]	(180,190]
180913	West	-4.61680381102548	48.3392119141234	7.50156281957919	42.2225813994049	179.927879859481	(7.4,7.6]	(40,50]	(170,180]
180914	West	-4.61680112102548	48.3392119141234	7.47317680384821	47.3474467957147	170.02725972315	(7.4,7.6]	(40,50]	(170,180]
180915	West	-4.61679843102548	48.3392119141234	7.39632227466048	58.7854488502064	158.61694814675	(7.2,7.4]	(50,60]	(150,160]
180916	West	-4.61679574102548	48.3392119141234	7.338099348614	65.9114793304074	160.77406631547	(7.2,7.4]	(60,70]	(160,170]
180917	West	-4.61679305102548	48.3392119141234	7.14333754680648	67.0294158514126	169.482836644056	(7,7.2]	(60,70]	(160,170]
180918	West	-4.61679036102548	48.3392119141234	7.15206196520733	68.8161492381292	164.392647039075	(7,7.2]	(60,70]	(160,170]
180919	West	-4.61678767102548	48.3392119141234	6.91240294236663	70.7566583428103	162.750614222883	(6.8,7]	(70,80]	(160,170]
180920	West	-4.61678498102548	48.3392119141234	6.78742263932131	71.9782018923886	155.140374888963	(6.6,6.8]	(70,80]	(150,160]
180921	West	-4.61678229102548	48.3392119141234	6.30322203529044	71.7067225958144	143.476487484243	(6.2,6.4]	(70,80]	(140,150]
180922	West	-4.61677960102548	48.3392119141234	5.96279309964092	64.3549439162033	141.290213187733	(5.8,6]	(60,70]	(140,150]
180923	West	-4.61677691102548	48.3392119141234	5.81572787631046	38.0486579305282	158.506664137527	(5.8,6]	(30,40]	(150,160]
180924	West	-4.61677422102548	48.3392119141234	5.94611801980494	33.3768302748404	269.101759771401	(5.8,6]	(30,40]	(260,270]
180925	West	-4.61677153102548	48.3392119141234	6.1347407817554	35.3600379331729	301.199168752238	(6,6.2]	(30,40]	(300,310]
180926	West	-4.61676884102548	48.3392119141234	6.16894615896361	21.5046789141215	357.280746746929	(6,6.2]	(20,30]	(350,360]
180927	West	-4.61676615102548	48.3392119141234	6.03839612273333	25.0754601980689	294.083938579199	(6,6.2]	(20,30]	(290,300]
180928	West	-4.61676346102548	48.3392119141234	6.27538407637695	60.4577189654339	274.324990063699	(6.2,6.4]	(60,70]	(270,280]
180929	West	-4.61676077102548	48.3392119141234	6.75052700889974	68.9978437643186	268.605746557067	(6.6,6.8]	(60,70]	(260,270]
180930	West	-4.61675808102548	48.3392119141234	7.36245979425995	59.2850381531952	243.424573790038	(7.2,7.4]	(50,60]	(240,250]
180931	West	-4.61675539102548	48.3392119141234	7.39275579395521	49.9206151792224	192.341979566255	(7.2,7.4]	(40,50]	(190,200]
180932	West	-4.61675270102548	48.3392119141234	7.46026607043421	50.1819476714355	190.608441264529	(7.4,7.6]	(50,60]	(190,200]
180933	West	-4.61675001102548	48.3392119141234	7.53104700747607	51.1207055782886	186.340772698374	(7.4,7.6]	(50,60]	(180,190]
180934	West	-4.61674732102548	48.3392119141234	7.53059817645649	52.2900437355928	176.519818043848	(7.4,7.6]	(50,60]	(170,180]
180935	West	-4.61674463102548	48.3392119141234	7.47417092274576	55.1003393416169	169.278225064331	(7.4,7.6]	(50,60]	(160,170]
180936	West	-4.61674194102548	48.3392119141234	7.43122820835264	57.9986278069065	166.259333759041	(7.4,7.6]	(50,60]	(160,170]
180937	West	-4.61673925102548	48.3392119141234	7.28697602815216	58.8666399063123	163.191543083836	(7.2,7.4]	(50,60]	(160,170]
180938	West	-4.61673656102548	48.3392119141234	7.18669773903124	57.2220061794672	162.907578793082	(7,7.2]	(50,60]	(160,170]
180939	West	-4.61673387102548	48.3392119141234	7.09234012428	54.4558996500831	164.791497175791	(7,7.2]	(50,60]	(160,170]
180940	West	-4.61673118102548	48.3392119141234	7.02143811320402	46.1208553786441	192.233118457203	(7,7.2]	(40,50]	(190,200]
180941	West	-4.61672849102548	48.3392119141234	7.14470171978955	45.5794997116441	252.517861024859	(7,7.2]	(40,50]	(250,260]
180942	West	-4.61672580102548	48.3392119141234	7.38899684958776	50.5605908909159	290.444895001628	(7.2,7.4]	(50,60]	(290,300]
180943	West	-4.61672311102548	48.3392119141234	7.60731286642874	53.7232354319439	313.055009250955	(7.6,7.8]	(50,60]	(310,320]
180944	West	-4.61672042102548	48.3392119141234	7.84419002456136	56.5968729844096	317.875738534769	(7.8,8]	(50,60]	(310,320]
181009	West	-4.61654557102548	48.3392119141234	7.76373644571164	6.4772954778164	182.278468644645	(7.6,7.8]	(0,10]	(180,190]
181010	West	-4.61654288102548	48.3392119141234	7.7665403039541	7.18225603835268	197.28793180485	(7.6,7.8]	(0,10]	(190,200]
181011	West	-4.61654019102548	48.3392119141234	7.77564491622654	8.89760121216248	207.410759348652	(7.6,7.8]	(0,10]	(200,210]
181012	West	-4.61653750102548	48.3392119141234	7.79002039886356	10.6112873461996	204.294753833597	(7.6,7.8]	(10,20]	(200,210]
181068	West	-4.61638686102548	48.3392119141234	7.67914557392327	70.9720210992561	98.2033390169257	(7.6,7.8]	(70,80]	(90,100]
181069	West	-4.61638417102548	48.3392119141234	6.89560523990746	66.5736682141874	106.33666021768	(6.8,7]	(60,70]	(100,110]
181070	West	-4.61638148102548	48.3392119141234	6.71642081283657	35.9860485951757	142.317240503015	(6.6,6.8]	(30,40]	(140,150]
181071	West	-4.61637879102548	48.3392119141234	6.74490713439671	29.5884760593388	174.856494925944	(6.6,6.8]	(20,30]	(170,180]
181072	West	-4.61637610102548	48.3392119141234	6.68135769150292	39.714107490215	157.221315479734	(6.6,6.8]	(30,40]	(150,160]
181073	West	-4.61637341102548	48.3392119141234	6.61002681825852	41.4083322320944	154.349966761638	(6.6,6.8]	(40,50]	(150,160]
181074	West	-4.61637072102548	48.3392119141234	6.56058472020511	33.8129635007579	147.842723917318	(6.4,6.6]	(30,40]	(140,150]
181075	West	-4.61636803102548	48.3392119141234	6.51382478465438	27.1321704198919	140.923868283532	(6.4,6.6]	(20,30]	(140,150]
181076	West	-4.61636534102548	48.3392119141234	6.4341397140148	25.4135012927351	154.559439647607	(6.4,6.6]	(20,30]	(150,160]
181077	West	-4.61636265102548	48.3392119141234	6.41403542279922	26.562444548274	184.76702043304	(6.4,6.6]	(20,30]	(180,190]
181078	West	-4.61635996102548	48.3392119141234	6.43606596858215	23.2908844818017	179.453962745831	(6.4,6.6]	(20,30]	(170,180]
181079	West	-4.61635727102548	48.3392119141234	6.42879893868519	11.3686869888599	153.189124645525	(6.4,6.6]	(10,20]	(150,160]
181080	West	-4.61635458102548	48.3392119141234	6.41113130127629	9.04819962467282	255.438773676933	(6.4,6.6]	(0,10]	(250,260]
181081	West	-4.61635189102548	48.3392119141234	6.44248744419712	19.2105113994799	224.881406912993	(6.4,6.6]	(10,20]	(220,230]
181082	West	-4.61634920102548	48.3392119141234	6.44816777826137	28.1824969089168	190.451558916848	(6.4,6.6]	(20,30]	(190,200]
181083	West	-4.61634651102548	48.3392119141234	6.47079691792523	33.7102564704432	190.370552383261	(6.4,6.6]	(30,40]	(190,200]
181084	West	-4.61634382102548	48.3392119141234	6.53713585276822	33.8670249093726	190.752814591844	(6.4,6.6]	(30,40]	(190,200]
181085	West	-4.61634113102548	48.3392119141234	6.55083229395378	29.9220340251864	210.561988876203	(6.4,6.6]	(20,30]	(210,220]
181086	West	-4.61633844102548	48.3392119141234	6.67153637354497	33.1626683172159	236.206294969955	(6.6,6.8]	(30,40]	(230,240]
181087	West	-4.61633575102548	48.3392119141234	6.80685838349111	32.9527436609934	213.23278783429	(6.8,7]	(30,40]	(210,220]
181088	West	-4.61633306102548	48.3392119141234	6.85055654830172	40.1988896975549	179.104821813445	(6.8,7]	(40,50]	(170,180]
181089	West	-4.61633037102548	48.3392119141234	6.8086205486465	45.4781531035667	158.742263455526	(6.8,7]	(40,50]	(150,160]
181090	West	-4.61632768102548	48.3392119141234	6.69501377350897	49.1698288651879	142.077164478655	(6.6,6.8]	(40,50]	(140,150]
181091	West	-4.61632499102548	48.3392119141234	6.51536718803027	54.0863114852101	132.490999737251	(6.4,6.6]	(50,60]	(130,140]
181092	West	-4.61632230102548	48.3392119141234	6.25984855158303	47.9190668871564	138.217824374585	(6.2,6.4]	(40,50]	(130,140]
181093	West	-4.61631961102548	48.3392119141234	6.15352109474189	36.3817761376847	234.182823445871	(6,6.2]	(30,40]	(230,240]
181094	West	-4.61631692102548	48.3392119141234	6.51749003375828	54.8601296407964	262.451301271051	(6.4,6.6]	(50,60]	(260,270]
181095	West	-4.61631423102548	48.3392119141234	6.81171094087155	45.7157065578539	244.427357557526	(6.8,7]	(40,50]	(240,250]
181096	West	-4.61631154102548	48.3392119141234	6.88003489227594	43.0012437550731	202.740718068493	(6.8,7]	(40,50]	(200,210]
181097	West	-4.61630885102548	48.3392119141234	6.90132744704832	45.7767973101651	187.075803841943	(6.8,7]	(40,50]	(180,190]
181098	West	-4.61630616102548	48.3392119141234	6.91523386344578	43.0795886295894	168.020613111937	(6.8,7]	(40,50]	(160,170]
182544	West	-4.61721000102548	48.3392101241234	7.95860137207334	50.4101490236747	148.351456121586	(7.8,8]	(50,60]	(140,150]
182545	West	-4.61720731102548	48.3392101241234	7.84205778367279	51.8957293252145	144.660557202213	(7.8,8]	(50,60]	(140,150]
182546	West	-4.61720462102548	48.3392101241234	7.67486418985658	60.1055992261157	138.875963743915	(7.6,7.8]	(60,70]	(130,140]
182547	West	-4.61720193102548	48.3392101241234	7.4481087205825	65.1620559201875	141.578516069384	(7.4,7.6]	(60,70]	(140,150]
182548	West	-4.61719924102548	48.3392101241234	7.16310915926294	65.4476323835539	141.571160898521	(7,7.2]	(60,70]	(140,150]
182549	West	-4.61719655102548	48.3392101241234	6.81793437612978	63.4142489146419	140.503234243942	(6.8,7]	(60,70]	(140,150]
182550	West	-4.61719386102548	48.3392101241234	6.66846560159342	62.4838109954587	141.7748113393	(6.6,6.8]	(60,70]	(140,150]
182551	West	-4.61719117102548	48.3392101241234	6.37244536963681	64.3747554640066	143.822173338865	(6.2,6.4]	(60,70]	(140,150]
182552	West	-4.61718848102548	48.3392101241234	6.2002396504281	67.4779634182636	143.060098422669	(6.2,6.4]	(60,70]	(140,150]
182553	West	-4.61718579102548	48.3392101241234	5.66306745769949	52.0728036013759	166.775921446365	(5.6,5.8]	(50,60]	(160,170]
182554	West	-4.61718310102548	48.3392101241234	5.87862489876249	59.3043244633201	290.735326602677	(5.8,6]	(50,60]	(290,300]
182555	West	-4.61718041102548	48.3392101241234	6.41200453935122	70.910459371837	313.953951014081	(6.4,6.6]	(70,80]	(310,320]
182556	West	-4.61717772102548	48.3392101241234	6.8689944203019	71.0881371003549	313.261818946088	(6.8,7]	(70,80]	(310,320]
182557	West	-4.61717503102548	48.3392101241234	7.28165690231698	64.3817447427531	306.942397573901	(7.2,7.4]	(60,70]	(300,310]
182558	West	-4.61717234102548	48.3392101241234	7.52170963025281	45.8901166250838	306.324927307145	(7.4,7.6]	(40,50]	(300,310]
182559	West	-4.61716965102548	48.3392101241234	7.57797728688752	42.5384553703393	306.926734128958	(7.4,7.6]	(40,50]	(300,310]
182560	West	-4.61716696102548	48.3392101241234	7.74923906135994	64.9913105961079	293.747139727384	(7.6,7.8]	(60,70]	(290,300]
182613	West	-4.61702439102548	48.3392101241234	7.96702079024393	11.6864165536186	159.273532388136	(7.8,8]	(10,20]	(150,160]
182614	West	-4.61702170102548	48.3392101241234	7.90365231002035	29.518190650726	146.316548809322	(7.8,8]	(20,30]	(140,150]
182615	West	-4.61701901102548	48.3392101241234	7.8096080230716	36.4399894168845	146.778579376739	(7.8,8]	(30,40]	(140,150]
182616	West	-4.61701632102548	48.3392101241234	7.70571012411497	37.9557374219963	148.073436837547	(7.6,7.8]	(30,40]	(140,150]
182617	West	-4.61701363102548	48.3392101241234	7.63079258972958	39.1155644667211	148.716289479817	(7.6,7.8]	(30,40]	(140,150]
182618	West	-4.61701094102548	48.3392101241234	7.53995093960568	37.59222119401	149.941448988828	(7.4,7.6]	(30,40]	(140,150]
182619	West	-4.61700825102548	48.3392101241234	7.49234014053446	27.9288824752637	162.414678046948	(7.4,7.6]	(20,30]	(160,170]
182620	West	-4.61700556102548	48.3392101241234	7.49919981852708	19.8554372850987	168.083974371184	(7.4,7.6]	(10,20]	(160,170]
182621	West	-4.61700287102548	48.3392101241234	7.46917104935861	22.7901430802351	146.421219320044	(7.4,7.6]	(20,30]	(140,150]
182622	West	-4.61700018102548	48.3392101241234	7.40420279281155	28.4518855993251	144.05513715842	(7.4,7.6]	(20,30]	(140,150]
182623	West	-4.61699749102548	48.3392101241234	7.34030406676766	30.1267281516055	152.517585770303	(7.2,7.4]	(30,40]	(150,160]
182624	West	-4.61699480102548	48.3392101241234	7.2965236147702	31.8290976017056	152.141520960675	(7.2,7.4]	(30,40]	(150,160]
182625	West	-4.61699211102548	48.3392101241234	7.22607118680082	33.0891405964083	149.873756072189	(7.2,7.4]	(30,40]	(140,150]
182626	West	-4.61698942102548	48.3392101241234	7.16367856678709	32.6037595174435	155.0893252664	(7,7.2]	(30,40]	(150,160]
182627	West	-4.61698673102548	48.3392101241234	7.11682946706953	33.0683986216193	155.363036724642	(7,7.2]	(30,40]	(150,160]
182628	West	-4.61698404102548	48.3392101241234	7.05093948811531	32.9599422299696	154.847339065097	(7,7.2]	(30,40]	(150,160]
182629	West	-4.61698135102548	48.3392101241234	7.00249270570834	32.1712845714173	157.378831863594	(7,7.2]	(30,40]	(150,160]
182630	West	-4.61697866102548	48.3392101241234	6.95704134353962	34.8105735240152	149.179740540473	(6.8,7]	(30,40]	(140,150]
182631	West	-4.61697597102548	48.3392101241234	6.84537196225471	39.3354832302364	140.681273804103	(6.8,7]	(30,40]	(140,150]
182632	West	-4.61697328102548	48.3392101241234	6.72485042362214	39.2513310150733	138.045012355842	(6.6,6.8]	(30,40]	(130,140]
182633	West	-4.61697059102548	48.3392101241234	6.64645841566574	35.1716114607145	135.093669260799	(6.6,6.8]	(30,40]	(130,140]
182634	West	-4.61696790102548	48.3392101241234	6.55936369084408	33.18772122049	133.897419220155	(6.4,6.6]	(30,40]	(130,140]
182635	West	-4.61696521102548	48.3392101241234	6.45249406970885	32.7870893921645	138.490166340112	(6.4,6.6]	(30,40]	(130,140]
182636	West	-4.61696252102548	48.3392101241234	6.37591434261015	25.7832011201103	168.951188412617	(6.2,6.4]	(20,30]	(160,170]
182637	West	-4.61695983102548	48.3392101241234	6.43999211403078	28.6651716702353	209.308602539623	(6.4,6.6]	(20,30]	(200,210]
182638	West	-4.61695714102548	48.3392101241234	6.50531672199451	32.4666959953396	184.816293461136	(6.4,6.6]	(30,40]	(180,190]
182639	West	-4.61695445102548	48.3392101241234	6.42571405154137	46.8714444774924	190.196346296942	(6.4,6.6]	(40,50]	(190,200]
182640	West	-4.61695176102548	48.3392101241234	6.51312263431964	62.6828084088969	213.601843962332	(6.4,6.6]	(60,70]	(210,220]
182641	West	-4.61694907102548	48.3392101241234	6.82682708469585	66.2387229845943	211.1379682117	(6.8,7]	(60,70]	(210,220]
182642	West	-4.61694638102548	48.3392101241234	7.00703368607427	61.873494882004	194.279878891085	(7,7.2]	(60,70]	(190,200]
182643	West	-4.61694369102548	48.3392101241234	6.96446115385526	53.3969460794066	177.387799323038	(6.8,7]	(50,60]	(170,180]
182644	West	-4.61694100102548	48.3392101241234	6.87246962788779	39.6925705941453	168.730423852975	(6.8,7]	(30,40]	(160,170]
182645	West	-4.61693831102548	48.3392101241234	6.88961412555629	20.2778402885498	200.409672832617	(6.8,7]	(20,30]	(200,210]
182646	West	-4.61693562102548	48.3392101241234	7.0425517571295	11.5154271305973	275.212596221387	(7,7.2]	(10,20]	(270,280]
182647	West	-4.61693293102548	48.3392101241234	7.08258069400892	10.8456091486812	10.9774507280161	(7,7.2]	(10,20]	(10,20]
182648	West	-4.61693024102548	48.3392101241234	7.04278686774011	12.9248028095557	25.000428780504	(7,7.2]	(10,20]	(20,30]
182649	West	-4.61692755102548	48.3392101241234	7.02175962152304	10.7608633474135	347.532172490835	(7,7.2]	(10,20]	(340,350]
182650	West	-4.61692486102548	48.3392101241234	7.06091406056724	26.6991802428788	269.236501575403	(7,7.2]	(20,30]	(260,270]
182651	West	-4.61692217102548	48.3392101241234	7.24804095344068	44.6555962523214	243.982822399093	(7.2,7.4]	(40,50]	(240,250]
182652	West	-4.61691948102548	48.3392101241234	7.46554039224236	41.6810508839926	210.158003576376	(7.4,7.6]	(40,50]	(210,220]
182653	West	-4.61691679102548	48.3392101241234	7.45769262006134	40.9295590633571	183.229631316865	(7.4,7.6]	(40,50]	(180,190]
182654	West	-4.61691410102548	48.3392101241234	7.44518817249264	41.6578767404239	188.34634227035	(7.4,7.6]	(40,50]	(180,190]
182655	West	-4.61691141102548	48.3392101241234	7.42181215633495	39.8054193995843	188.357168719689	(7.4,7.6]	(30,40]	(180,190]
182656	West	-4.61690872102548	48.3392101241234	7.43028147856513	35.141773812252	185.582522561535	(7.4,7.6]	(30,40]	(180,190]
182657	West	-4.61690603102548	48.3392101241234	7.43565034567283	33.0719578908308	174.061690409918	(7.4,7.6]	(30,40]	(170,180]
182658	West	-4.61690334102548	48.3392101241234	7.41418550120201	33.8297302533197	170.493707069131	(7.4,7.6]	(30,40]	(170,180]
182659	West	-4.61690065102548	48.3392101241234	7.42649315263952	33.2913022606278	162.143841828633	(7.4,7.6]	(30,40]	(160,170]
182660	West	-4.61689796102548	48.3392101241234	7.38009257610708	33.5282974875021	151.707539116797	(7.2,7.4]	(30,40]	(150,160]
182661	West	-4.61689527102548	48.3392101241234	7.32804871710797	32.2287339046457	156.825260168827	(7.2,7.4]	(30,40]	(150,160]
182662	West	-4.61689258102548	48.3392101241234	7.28641676624601	33.7859555838283	167.235676089332	(7.2,7.4]	(30,40]	(160,170]
182663	West	-4.61688989102548	48.3392101241234	7.26493998667317	44.760746751273	183.847481237344	(7.2,7.4]	(40,50]	(180,190]
182664	West	-4.61688720102548	48.3392101241234	7.31773445163426	59.4918728382713	197.914786131782	(7.2,7.4]	(50,60]	(190,200]
182665	West	-4.61688451102548	48.3392101241234	7.50374350408678	65.4812251056184	201.268043562682	(7.4,7.6]	(60,70]	(200,210]
182666	West	-4.61688182102548	48.3392101241234	7.55767692659994	64.4185050589284	192.029494332937	(7.4,7.6]	(60,70]	(190,200]
182667	West	-4.61687913102548	48.3392101241234	7.59030024907864	65.4115229013738	189.344818112013	(7.4,7.6]	(60,70]	(180,190]
182668	West	-4.61687644102548	48.3392101241234	7.79140093881249	69.0887562839922	189.206655472789	(7.6,7.8]	(60,70]	(180,190]
182669	West	-4.61687375102548	48.3392101241234	7.84055607151692	70.529547113426	183.361970501374	(7.8,8]	(70,80]	(180,190]
182670	West	-4.61687106102548	48.3392101241234	7.87048832318772	69.3100134486622	178.135048593563	(7.8,8]	(60,70]	(170,180]
182671	West	-4.61686837102548	48.3392101241234	7.82924438923367	68.3005981619811	172.698225743649	(7.8,8]	(60,70]	(170,180]
182672	West	-4.61686568102548	48.3392101241234	7.80710480470122	67.6577875058082	180.189698631382	(7.8,8]	(60,70]	(180,190]
182673	West	-4.61686299102548	48.3392101241234	7.86692111441265	64.8435105297149	189.220618246647	(7.8,8]	(60,70]	(180,190]
182674	West	-4.61686030102548	48.3392101241234	7.84845658195694	59.8528970435808	180.416603439084	(7.8,8]	(50,60]	(180,190]
182675	West	-4.61685761102548	48.3392101241234	7.78245757527129	59.0771893075385	170.098315658447	(7.6,7.8]	(50,60]	(170,180]
182676	West	-4.61685492102548	48.3392101241234	7.75494167575796	64.8686950979658	154.254411912585	(7.6,7.8]	(60,70]	(150,160]
182677	West	-4.61685223102548	48.3392101241234	7.44583107176762	67.7760414501141	151.548049715448	(7.4,7.6]	(60,70]	(150,160]
182678	West	-4.61684954102548	48.3392101241234	7.26599283500994	63.6249321346428	161.851112518984	(7.2,7.4]	(60,70]	(160,170]
182679	West	-4.61684685102548	48.3392101241234	7.14843272298564	58.0603386929124	163.745626004335	(7,7.2]	(50,60]	(160,170]
182680	West	-4.61684416102548	48.3392101241234	7.02220568642957	53.0078177760548	169.781771101493	(7,7.2]	(50,60]	(160,170]
182681	West	-4.61684147102548	48.3392101241234	7.0182303606132	48.0721303647093	179.870371491217	(7,7.2]	(40,50]	(170,180]
182682	West	-4.61683878102548	48.3392101241234	7.02795795572781	42.8266053075918	185.418237577397	(7,7.2]	(40,50]	(180,190]
182683	West	-4.61683609102548	48.3392101241234	7.06386210707795	37.2698525610853	197.142404428614	(7,7.2]	(30,40]	(190,200]
182684	West	-4.61683340102548	48.3392101241234	7.14107468456295	33.0085751269147	215.523988902117	(7,7.2]	(30,40]	(210,220]
182685	West	-4.61683071102548	48.3392101241234	7.26252934235701	28.3304281705051	212.78181424634	(7.2,7.4]	(20,30]	(210,220]
182686	West	-4.61682802102548	48.3392101241234	7.26873398893246	35.0943196155302	198.009862536769	(7.2,7.4]	(30,40]	(190,200]
182687	West	-4.61682533102548	48.3392101241234	7.3589151271949	45.4399578344904	181.37183152377	(7.2,7.4]	(40,50]	(180,190]
182688	West	-4.61682264102548	48.3392101241234	7.34991937648217	47.9363167864328	178.367594677381	(7.2,7.4]	(40,50]	(170,180]
182689	West	-4.61681995102548	48.3392101241234	7.39314503264539	44.3145283609246	188.369507565605	(7.2,7.4]	(40,50]	(180,190]
182690	West	-4.61681726102548	48.3392101241234	7.39520183350149	40.0039236857325	182.444558719947	(7.2,7.4]	(40,50]	(180,190]
182691	West	-4.61681457102548	48.3392101241234	7.37411729863198	36.6979361469713	180.954808266057	(7.2,7.4]	(30,40]	(180,190]
182692	West	-4.61681188102548	48.3392101241234	7.36983402244953	34.9378935307589	173.006867372001	(7.2,7.4]	(30,40]	(170,180]
182693	West	-4.61680919102548	48.3392101241234	7.29925200508944	39.307611352358	166.574583475281	(7.2,7.4]	(30,40]	(160,170]
182694	West	-4.61680650102548	48.3392101241234	7.26091485177624	47.3523185360595	176.974314994835	(7.2,7.4]	(40,50]	(170,180]
182695	West	-4.61680381102548	48.3392101241234	7.33841176503959	57.3339431830088	168.333115899886	(7.2,7.4]	(50,60]	(160,170]
182696	West	-4.61680112102548	48.3392101241234	7.2605845820202	68.6650399594177	159.437958955786	(7.2,7.4]	(60,70]	(150,160]
182697	West	-4.61679843102548	48.3392101241234	7.20720486126934	74.425190783629	158.795218001832	(7.2,7.4]	(70,80]	(150,160]
182698	West	-4.61679574102548	48.3392101241234	6.63320104798478	74.5387495883615	167.314191070337	(6.6,6.8]	(70,80]	(160,170]
182699	West	-4.61679305102548	48.3392101241234	6.701661978908	73.5037745499167	173.09780087669	(6.6,6.8]	(70,80]	(170,180]
182700	West	-4.61679036102548	48.3392101241234	6.48410415389784	73.8262468316135	165.414173589405	(6.4,6.6]	(70,80]	(160,170]
182701	West	-4.61678767102548	48.3392101241234	6.24103557904496	73.1784798565521	166.032532413986	(6.2,6.4]	(70,80]	(160,170]
182702	West	-4.61678498102548	48.3392101241234	6.11282004921836	71.0698644177836	161.056264001786	(6,6.2]	(70,80]	(160,170]
182703	West	-4.61678229102548	48.3392101241234	5.83893161391208	65.2577254872793	153.295693188159	(5.8,6]	(60,70]	(150,160]
182704	West	-4.61677960102548	48.3392101241234	5.76998552277958	53.1303826908982	153.793275102823	(5.6,5.8]	(50,60]	(150,160]
182705	West	-4.61677691102548	48.3392101241234	5.66105802166522	41.1898815736252	196.323203007105	(5.6,5.8]	(40,50]	(190,200]
182706	West	-4.61677422102548	48.3392101241234	5.89684285526575	50.519167058402	237.087370245959	(5.8,6]	(50,60]	(230,240]
182707	West	-4.61677153102548	48.3392101241234	6.09638645702599	42.3941508588066	232.007058832518	(6,6.2]	(40,50]	(230,240]
182708	West	-4.61676884102548	48.3392101241234	6.2266257255098	19.9955920680675	208.197634679261	(6.2,6.4]	(10,20]	(200,210]
182709	West	-4.61676615102548	48.3392101241234	6.15884427303039	28.3530376749463	284.215131412976	(6,6.2]	(20,30]	(280,290]
182710	West	-4.61676346102548	48.3392101241234	6.34866243507193	60.3120521674066	278.580861019987	(6.2,6.4]	(60,70]	(270,280]
182711	West	-4.61676077102548	48.3392101241234	6.9133921045031	62.163653642214	260.689131698846	(6.8,7]	(60,70]	(260,270]
182712	West	-4.61675808102548	48.3392101241234	7.11356045071384	52.9745637310059	219.166174921313	(7,7.2]	(50,60]	(210,220]
182713	West	-4.61675539102548	48.3392101241234	7.14507940148053	52.0918603718178	193.325035402977	(7,7.2]	(50,60]	(190,200]
182714	West	-4.61675270102548	48.3392101241234	7.2196917670344	52.0407926334342	186.095529589552	(7.2,7.4]	(50,60]	(180,190]
182715	West	-4.61675001102548	48.3392101241234	7.16664162132671	55.31568222157	179.952915832614	(7,7.2]	(50,60]	(170,180]
182716	West	-4.61674732102548	48.3392101241234	7.23188298456174	58.051263923736	174.665592378918	(7.2,7.4]	(50,60]	(170,180]
182717	West	-4.61674463102548	48.3392101241234	7.14133964746518	59.2301541474996	167.720939335246	(7,7.2]	(50,60]	(160,170]
182718	West	-4.61674194102548	48.3392101241234	7.04559012791857	57.634160808904	167.70886473861	(7,7.2]	(50,60]	(160,170]
182719	West	-4.61673925102548	48.3392101241234	6.98364062010598	53.0208391430959	166.707274717936	(6.8,7]	(50,60]	(160,170]
182720	West	-4.61673656102548	48.3392101241234	6.92717182333604	45.42238789666	167.009570992016	(6.8,7]	(40,50]	(160,170]
182721	West	-4.61673387102548	48.3392101241234	6.87611492814914	27.5392748666425	180.255208213916	(6.8,7]	(20,30]	(180,190]
182722	West	-4.61673118102548	48.3392101241234	6.84472348162103	44.3466312795923	284.555792891512	(6.8,7]	(40,50]	(280,290]
182723	West	-4.61672849102548	48.3392101241234	7.21926279927818	63.1359123700819	300.407044250109	(7.2,7.4]	(60,70]	(300,310]
182724	West	-4.61672580102548	48.3392101241234	7.59395573875661	63.6049709220234	312.270912414745	(7.4,7.6]	(60,70]	(310,320]
182725	West	-4.61672311102548	48.3392101241234	7.90068426690548	58.4470530122127	320.19034832966	(7.8,8]	(50,60]	(320,330]
182790	West	-4.61654826102548	48.3392101241234	7.72531874134298	11.1104375871267	172.368690660122	(7.6,7.8]	(10,20]	(170,180]
182791	West	-4.61654557102548	48.3392101241234	7.72334491780165	10.2903023274417	182.982201900378	(7.6,7.8]	(10,20]	(180,190]
182792	West	-4.61654288102548	48.3392101241234	7.72822073350312	9.6431494430434	194.429994882313	(7.6,7.8]	(0,10]	(190,200]
182793	West	-4.61654019102548	48.3392101241234	7.73805834891906	9.34336762041192	201.334032915575	(7.6,7.8]	(0,10]	(200,210]
182794	West	-4.61653750102548	48.3392101241234	7.7505493055167	9.41580176445163	199.102832124584	(7.6,7.8]	(0,10]	(190,200]
182795	West	-4.61653481102548	48.3392101241234	7.7635230705984	9.41644927540522	192.054817031577	(7.6,7.8]	(0,10]	(190,200]
182808	West	-4.61649984102548	48.3392101241234	7.92739065370792	27.5884103179264	165.131274438218	(7.8,8]	(20,30]	(160,170]
182809	West	-4.61649715102548	48.3392101241234	7.95267743852118	37.4769310209814	187.321879923855	(7.8,8]	(30,40]	(180,190]
182810	West	-4.61649446102548	48.3392101241234	7.96416347715746	43.8166380544416	181.08788117281	(7.8,8]	(40,50]	(180,190]
182811	West	-4.61649177102548	48.3392101241234	7.95728438685452	46.1580946071098	175.484540687165	(7.8,8]	(40,50]	(170,180]
182812	West	-4.61648908102548	48.3392101241234	7.92089018757054	44.7207530277479	182.320985509205	(7.8,8]	(40,50]	(180,190]
182813	West	-4.61648639102548	48.3392101241234	7.9468534635284	41.5429254250605	198.924669583894	(7.8,8]	(40,50]	(190,200]
182834	West	-4.61642990102548	48.3392101241234	7.99027370500937	41.5769038392138	152.644344693161	(7.8,8]	(40,50]	(150,160]
182835	West	-4.61642721102548	48.3392101241234	7.95786681432117	22.568889917353	204.587360820667	(7.8,8]	(20,30]	(200,210]
182844	West	-4.61640300102548	48.3392101241234	7.9811894223098	54.206819384477	163.096367983362	(7.8,8]	(50,60]	(160,170]
182845	West	-4.61640031102548	48.3392101241234	7.90940430311286	50.5245367553931	175.350621309801	(7.8,8]	(50,60]	(170,180]
182846	West	-4.61639762102548	48.3392101241234	7.95815159026917	49.877276616459	190.666759072153	(7.8,8]	(40,50]	(190,200]
182849	West	-4.61638955102548	48.3392101241234	7.99283548425695	62.5229285648567	133.580101761908	(7.8,8]	(60,70]	(130,140]
182850	West	-4.61638686102548	48.3392101241234	7.48795037610498	72.159526012477	112.781684688288	(7.4,7.6]	(70,80]	(110,120]
182851	West	-4.61638417102548	48.3392101241234	6.79226951606984	63.1717770496135	108.348863350693	(6.6,6.8]	(60,70]	(100,110]
182852	West	-4.61638148102548	48.3392101241234	6.66161149384919	12.9758551993844	119.273995699659	(6.6,6.8]	(10,20]	(110,120]
182853	West	-4.61637879102548	48.3392101241234	6.67417138236383	12.7232653240458	102.326918324575	(6.6,6.8]	(10,20]	(100,110]
182854	West	-4.61637610102548	48.3392101241234	6.57876785055963	31.1867763234857	114.357903152147	(6.4,6.6]	(30,40]	(110,120]
182855	West	-4.61637341102548	48.3392101241234	6.47177472591097	30.2877709047344	139.853530549083	(6.4,6.6]	(30,40]	(130,140]
182856	West	-4.61637072102548	48.3392101241234	6.45376247296472	30.7261790843136	156.791113940056	(6.4,6.6]	(30,40]	(150,160]
182857	West	-4.61636803102548	48.3392101241234	6.40645550432411	31.6346951816627	153.004655216756	(6.4,6.6]	(30,40]	(150,160]
182858	West	-4.61636534102548	48.3392101241234	6.33468231739757	26.5124325289047	157.490520202746	(6.2,6.4]	(20,30]	(150,160]
182859	West	-4.61636265102548	48.3392101241234	6.3073448871189	21.3974653458929	184.297490718907	(6.2,6.4]	(20,30]	(180,190]
182860	West	-4.61635996102548	48.3392101241234	6.34747450527252	20.0648661144073	199.425315463012	(6.2,6.4]	(20,30]	(190,200]
182861	West	-4.61635727102548	48.3392101241234	6.36131807949499	14.9561698596945	221.266941593193	(6.2,6.4]	(10,20]	(220,230]
182862	West	-4.61635458102548	48.3392101241234	6.42692422626131	10.9969705138219	259.776797608875	(6.4,6.6]	(10,20]	(250,260]
182863	West	-4.61635189102548	48.3392101241234	6.45400301044352	2.07518263662758	268.165437772569	(6.4,6.6]	(0,10]	(260,270]
182864	West	-4.61634920102548	48.3392101241234	6.4382274918519	4.78249249252741	149.676754164464	(6.4,6.6]	(0,10]	(140,150]
182865	West	-4.61634651102548	48.3392101241234	6.4288150717322	11.110743812437	182.211821431659	(6.4,6.6]	(10,20]	(180,190]
182866	West	-4.61634382102548	48.3392101241234	6.41673051545598	19.1886917537052	196.298078834922	(6.4,6.6]	(10,20]	(190,200]
182867	West	-4.61634113102548	48.3392101241234	6.4741940421984	30.3289806206794	216.302530573961	(6.4,6.6]	(30,40]	(210,220]
182868	West	-4.61633844102548	48.3392101241234	6.61927286111045	38.7080448231184	209.756758383364	(6.6,6.8]	(30,40]	(200,210]
182869	West	-4.61633575102548	48.3392101241234	6.65121163196556	44.0930001548902	183.115475996993	(6.6,6.8]	(40,50]	(180,190]
182870	West	-4.61633306102548	48.3392101241234	6.58091121846915	49.1052806322181	170.868473338884	(6.4,6.6]	(40,50]	(170,180]
182871	West	-4.61633037102548	48.3392101241234	6.54147678776984	51.4388867801445	163.246940018491	(6.4,6.6]	(50,60]	(160,170]
182872	West	-4.61632768102548	48.3392101241234	6.45906178732206	54.2506266193945	150.270536777874	(6.4,6.6]	(50,60]	(150,160]
182873	West	-4.61632499102548	48.3392101241234	6.27978639644069	55.1031299673705	139.112810480192	(6.2,6.4]	(50,60]	(130,140]
182874	West	-4.61632230102548	48.3392101241234	6.05657851679475	36.7016332827673	155.556460469689	(6,6.2]	(30,40]	(150,160]
182875	West	-4.61631961102548	48.3392101241234	6.16570963641396	44.5443569279551	252.297386618831	(6,6.2]	(40,50]	(250,260]
182876	West	-4.61631692102548	48.3392101241234	6.47547794839707	50.741633997063	246.339142847407	(6.4,6.6]	(50,60]	(240,250]
182877	West	-4.61631423102548	48.3392101241234	6.62164695205847	47.27706970851	206.456695014618	(6.6,6.8]	(40,50]	(200,210]
182878	West	-4.61631154102548	48.3392101241234	6.65395288637756	49.7036410763358	189.531162872774	(6.6,6.8]	(40,50]	(180,190]
182879	West	-4.61630885102548	48.3392101241234	6.68387712230461	48.2311427958333	189.917659579098	(6.6,6.8]	(40,50]	(180,190]
182880	West	-4.61630616102548	48.3392101241234	6.72834408029473	43.322682271857	180.175629499257	(6.6,6.8]	(40,50]	(180,190]
182881	West	-4.61630347102548	48.3392101241234	6.68346089092559	37.2276154733235	157.900715090268	(6.6,6.8]	(30,40]	(150,160]
184324	West	-4.61721538102548	48.3392083341234	7.9608118826909	47.2258420696991	153.130871829006	(7.8,8]	(40,50]	(150,160]
184325	West	-4.61721269102548	48.3392083341234	7.86188000071845	49.2136627326643	154.315096445162	(7.8,8]	(40,50]	(150,160]
184326	West	-4.61721000102548	48.3392083341234	7.76262139624722	50.5287213744312	150.265077491687	(7.6,7.8]	(50,60]	(150,160]
184327	West	-4.61720731102548	48.3392083341234	7.62738471663352	58.4590560236913	141.860301927158	(7.6,7.8]	(50,60]	(140,150]
184328	West	-4.61720462102548	48.3392083341234	7.42908636076174	67.8532279310494	137.315271386421	(7.4,7.6]	(60,70]	(130,140]
184329	West	-4.61720193102548	48.3392083341234	6.92663378960427	68.8014664674882	144.57789160072	(6.8,7]	(60,70]	(140,150]
184330	West	-4.61719924102548	48.3392083341234	6.7530239367578	65.3714474757758	151.366385140848	(6.6,6.8]	(60,70]	(150,160]
184331	West	-4.61719655102548	48.3392083341234	6.57481335922892	63.0551738033306	145.32424187949	(6.4,6.6]	(60,70]	(140,150]
184332	West	-4.61719386102548	48.3392083341234	6.27136274525665	63.7949290712979	141.231571593553	(6.2,6.4]	(60,70]	(140,150]
184333	West	-4.61719117102548	48.3392083341234	6.06579723461363	67.2195932899267	139.52181753323	(6,6.2]	(60,70]	(130,140]
184334	West	-4.61718848102548	48.3392083341234	5.63016114091409	62.8875402806546	144.00795446835	(5.6,5.8]	(60,70]	(140,150]
184335	West	-4.61718579102548	48.3392083341234	5.55711421591682	54.9536036001352	259.975512206572	(5.4,5.6]	(50,60]	(250,260]
184336	West	-4.61718310102548	48.3392083341234	6.31912382075887	73.9166933913756	291.539986303647	(6.2,6.4]	(70,80]	(290,300]
184337	West	-4.61718041102548	48.3392083341234	6.92263330970299	71.7064974649097	307.559074912147	(6.8,7]	(70,80]	(300,310]
184338	West	-4.61717772102548	48.3392083341234	7.2404958241973	64.9901860012897	315.747138113909	(7.2,7.4]	(60,70]	(310,320]
184339	West	-4.61717503102548	48.3392083341234	7.48569202008011	52.3035522000946	314.312446688062	(7.4,7.6]	(50,60]	(310,320]
184340	West	-4.61717234102548	48.3392083341234	7.58314155217516	39.1004553475162	313.442328650268	(7.4,7.6]	(30,40]	(310,320]
184341	West	-4.61716965102548	48.3392083341234	7.67428689416641	53.6877765756179	304.366999259984	(7.6,7.8]	(50,60]	(300,310]
184395	West	-4.61702439102548	48.3392083341234	7.86204694986263	36.2870299849361	152.128635351501	(7.8,8]	(30,40]	(150,160]
184396	West	-4.61702170102548	48.3392083341234	7.7558705723296	40.8769552240693	150.618943299005	(7.6,7.8]	(40,50]	(150,160]
184397	West	-4.61701901102548	48.3392083341234	7.6797763879667	38.0900189568359	151.46779452644	(7.6,7.8]	(30,40]	(150,160]
184398	West	-4.61701632102548	48.3392083341234	7.60539187110037	35.9639273810554	146.317984520442	(7.6,7.8]	(30,40]	(140,150]
184399	West	-4.61701363102548	48.3392083341234	7.52136039693586	36.0127572698216	142.748871357054	(7.4,7.6]	(30,40]	(140,150]
184400	West	-4.61701094102548	48.3392083341234	7.41773751643913	32.2334622187346	150.542803024415	(7.4,7.6]	(30,40]	(150,160]
184401	West	-4.61700825102548	48.3392083341234	7.39261517135362	27.6382609477247	174.724566181922	(7.2,7.4]	(20,30]	(170,180]
184402	West	-4.61700556102548	48.3392083341234	7.41859929339207	27.9865004632606	175.296322576074	(7.4,7.6]	(20,30]	(170,180]
184403	West	-4.61700287102548	48.3392083341234	7.38913484429954	31.3506091437123	153.235177883514	(7.2,7.4]	(30,40]	(150,160]
184404	West	-4.61700018102548	48.3392083341234	7.2984599095824	33.5849498095801	146.034160430776	(7.2,7.4]	(30,40]	(140,150]
184405	West	-4.61699749102548	48.3392083341234	7.2246808303052	33.2998914651469	151.270584632936	(7.2,7.4]	(30,40]	(150,160]
184406	West	-4.61699480102548	48.3392083341234	7.17271254423835	35.4600661118693	152.353204272758	(7,7.2]	(30,40]	(150,160]
184407	West	-4.61699211102548	48.3392083341234	7.10127905751819	36.8656076826013	153.118011437482	(7,7.2]	(30,40]	(150,160]
184408	West	-4.61698942102548	48.3392083341234	7.04011999249144	36.1032559346711	157.521995423403	(7,7.2]	(30,40]	(150,160]
184409	West	-4.61698673102548	48.3392083341234	6.98798232560653	35.6857309419934	158.204536887233	(6.8,7]	(30,40]	(150,160]
184410	West	-4.61698404102548	48.3392083341234	6.93550451999309	35.1698523781444	158.120841620859	(6.8,7]	(30,40]	(150,160]
184411	West	-4.61698135102548	48.3392083341234	6.88801809320938	34.9544735147123	159.195667531771	(6.8,7]	(30,40]	(150,160]
184412	West	-4.61697866102548	48.3392083341234	6.83661346365469	36.7198081757085	150.796609290638	(6.8,7]	(30,40]	(150,160]
184413	West	-4.61697597102548	48.3392083341234	6.74862571930335	38.7178762233987	140.194028040871	(6.6,6.8]	(30,40]	(140,150]
184414	West	-4.61697328102548	48.3392083341234	6.63901567318784	37.0057384327277	139.818869112674	(6.6,6.8]	(30,40]	(130,140]
184415	West	-4.61697059102548	48.3392083341234	6.54983823641423	35.0304801110898	142.314966649947	(6.4,6.6]	(30,40]	(140,150]
184416	West	-4.61696790102548	48.3392083341234	6.45712204471725	35.028686026911	138.450763036177	(6.4,6.6]	(30,40]	(130,140]
184417	West	-4.61696521102548	48.3392083341234	6.3559256045148	32.0292006317662	139.038878511141	(6.2,6.4]	(30,40]	(130,140]
184418	West	-4.61696252102548	48.3392083341234	6.29045554483793	27.8455108999884	164.815268623576	(6.2,6.4]	(20,30]	(160,170]
184419	West	-4.61695983102548	48.3392083341234	6.31147099572383	35.1929056042012	190.470533296011	(6.2,6.4]	(30,40]	(190,200]
184420	West	-4.61695714102548	48.3392083341234	6.35530760710408	36.877427541034	178.497660856275	(6.2,6.4]	(30,40]	(170,180]
184421	West	-4.61695445102548	48.3392083341234	6.26257247350334	28.9700088713872	184.635939262856	(6.2,6.4]	(20,30]	(180,190]
184422	West	-4.61695176102548	48.3392083341234	6.273780170877	41.7555682476765	241.881312115394	(6.2,6.4]	(40,50]	(240,250]
184423	West	-4.61694907102548	48.3392083341234	6.49391356572679	49.4091668393749	245.099564847139	(6.4,6.6]	(40,50]	(240,250]
184424	West	-4.61694638102548	48.3392083341234	6.67310555314347	40.8326911685587	236.100611997256	(6.6,6.8]	(40,50]	(230,240]
184425	West	-4.61694369102548	48.3392083341234	6.86954524554486	25.021852578408	242.769353995798	(6.8,7]	(20,30]	(240,250]
184426	West	-4.61694100102548	48.3392083341234	6.98346219352383	15.8453771488132	300.436561747127	(6.8,7]	(10,20]	(300,310]
184427	West	-4.61693831102548	48.3392083341234	7.01096500313684	26.2124680685616	311.525290030009	(7,7.2]	(20,30]	(310,320]
184428	West	-4.61693562102548	48.3392083341234	7.09054523099787	20.7087969116151	315.019539677998	(7,7.2]	(20,30]	(310,320]
184429	West	-4.61693293102548	48.3392083341234	7.09376728074959	9.08913174827884	16.5750492098083	(7,7.2]	(0,10]	(10,20]
184430	West	-4.61693024102548	48.3392083341234	7.0812859913616	9.34747752036641	26.9500265672357	(7,7.2]	(0,10]	(20,30]
184431	West	-4.61692755102548	48.3392083341234	7.07310349924417	8.93100820575835	357.599620911509	(7,7.2]	(0,10]	(350,360]
184432	West	-4.61692486102548	48.3392083341234	7.08234615649386	9.41159228987598	260.78260160275	(7,7.2]	(0,10]	(260,270]
184433	West	-4.61692217102548	48.3392083341234	7.10847597859708	30.5906153528276	219.274634296244	(7,7.2]	(30,40]	(210,220]
184434	West	-4.61691948102548	48.3392083341234	7.18560536028664	41.0303619955246	196.957440028338	(7,7.2]	(40,50]	(190,200]
184435	West	-4.61691679102548	48.3392083341234	7.18767459692271	40.885104875934	188.130910641428	(7,7.2]	(40,50]	(180,190]
184436	West	-4.61691410102548	48.3392083341234	7.23622993877312	34.7157410314643	201.276449594792	(7.2,7.4]	(30,40]	(200,210]
184437	West	-4.61691141102548	48.3392083341234	7.32353979710457	27.157470845038	209.406124909296	(7.2,7.4]	(20,30]	(200,210]
184438	West	-4.61690872102548	48.3392083341234	7.39454219345779	21.7641378926015	198.992364796773	(7.2,7.4]	(20,30]	(190,200]
184439	West	-4.61690603102548	48.3392083341234	7.41535708790278	23.8121213706156	163.888924681139	(7.4,7.6]	(20,30]	(160,170]
184440	West	-4.61690334102548	48.3392083341234	7.34771383789194	29.6604200385581	161.219182806395	(7.2,7.4]	(20,30]	(160,170]
184441	West	-4.61690065102548	48.3392083341234	7.33514782445468	34.8855737494201	161.951940805083	(7.2,7.4]	(30,40]	(160,170]
184442	West	-4.61689796102548	48.3392083341234	7.25120094498314	39.5965844170808	155.276288466946	(7.2,7.4]	(30,40]	(150,160]
184443	West	-4.61689527102548	48.3392083341234	7.18675895735761	41.822277737498	160.236295408969	(7,7.2]	(40,50]	(160,170]
184444	West	-4.61689258102548	48.3392083341234	7.14719628125079	45.3456452737606	163.221647761761	(7,7.2]	(40,50]	(160,170]
184445	West	-4.61688989102548	48.3392083341234	7.07452537502212	49.9746450502029	165.158306412259	(7,7.2]	(40,50]	(160,170]
184446	West	-4.61688720102548	48.3392083341234	6.9597760284788	56.3099490210054	177.18890366559	(6.8,7]	(50,60]	(170,180]
184447	West	-4.61688451102548	48.3392083341234	6.96532914789257	62.7036321403844	199.096383047054	(6.8,7]	(60,70]	(190,200]
184448	West	-4.61688182102548	48.3392083341234	7.29999701324664	62.5868195390454	197.921380203157	(7.2,7.4]	(60,70]	(190,200]
184449	West	-4.61687913102548	48.3392083341234	7.27846438767732	62.0041277336813	181.168771085775	(7.2,7.4]	(60,70]	(180,190]
184450	West	-4.61687644102548	48.3392083341234	7.2060184148075	66.1637111227295	178.251537783749	(7.2,7.4]	(60,70]	(170,180]
184451	West	-4.61687375102548	48.3392083341234	7.16622576903857	69.3070870055651	180.695894949146	(7,7.2]	(60,70]	(180,190]
184452	West	-4.61687106102548	48.3392083341234	7.26422058609093	70.7023466848828	180.327566375431	(7.2,7.4]	(70,80]	(180,190]
184453	West	-4.61686837102548	48.3392083341234	7.24404872955999	72.0027252889209	171.477698369001	(7.2,7.4]	(70,80]	(170,180]
184454	West	-4.61686568102548	48.3392083341234	7.05998104518379	72.8063050708573	180.310610682251	(7,7.2]	(70,80]	(180,190]
184455	West	-4.61686299102548	48.3392083341234	7.27318571439277	73.1110828964695	191.693148225369	(7.2,7.4]	(70,80]	(190,200]
184456	West	-4.61686030102548	48.3392083341234	7.49221263351335	72.0772385325102	183.772389792155	(7.4,7.6]	(70,80]	(180,190]
184457	West	-4.61685761102548	48.3392083341234	7.46654861030637	71.6193201292401	174.088173226539	(7.4,7.6]	(70,80]	(170,180]
184458	West	-4.61685492102548	48.3392083341234	7.31941977557642	71.0468027478671	161.151240858268	(7.2,7.4]	(70,80]	(160,170]
184459	West	-4.61685223102548	48.3392083341234	6.88545075930484	66.6896072602904	159.686881348742	(6.8,7]	(60,70]	(150,160]
184460	West	-4.61684954102548	48.3392083341234	6.87694468690193	57.1490536228498	175.368667374415	(6.8,7]	(50,60]	(170,180]
184461	West	-4.61684685102548	48.3392083341234	6.87218665433521	46.3261402903908	175.548787310284	(6.8,7]	(40,50]	(170,180]
184462	West	-4.61684416102548	48.3392083341234	6.8717487498472	33.2768260534675	181.31231022621	(6.8,7]	(30,40]	(180,190]
184463	West	-4.61684147102548	48.3392083341234	6.89134539947513	25.2434660227104	197.936920056902	(6.8,7]	(20,30]	(190,200]
184464	West	-4.61683878102548	48.3392083341234	6.94029877190781	24.2049207991356	200.360716402986	(6.8,7]	(20,30]	(200,210]
184465	West	-4.61683609102548	48.3392083341234	6.99006354192194	29.5617414214132	209.174522938813	(6.8,7]	(20,30]	(200,210]
184466	West	-4.61683340102548	48.3392083341234	7.08593450019495	35.8834405603616	219.387193802397	(7,7.2]	(30,40]	(210,220]
184467	West	-4.61683071102548	48.3392083341234	7.16887291998241	35.5743626868247	191.679904443476	(7,7.2]	(30,40]	(190,200]
184468	West	-4.61682802102548	48.3392083341234	7.17347394850526	48.3056798458148	167.511128530093	(7,7.2]	(40,50]	(160,170]
184469	West	-4.61682533102548	48.3392083341234	7.09248597460367	58.6919166347665	167.175591030741	(7,7.2]	(50,60]	(160,170]
184470	West	-4.61682264102548	48.3392083341234	6.98993615115554	62.0290207674531	179.619155218852	(6.8,7]	(60,70]	(170,180]
184471	West	-4.61681995102548	48.3392083341234	7.08159944969025	61.5075011818843	190.474333319591	(7,7.2]	(60,70]	(190,200]
184472	West	-4.61681726102548	48.3392083341234	7.12153524488184	57.6870437116409	187.759019952819	(7,7.2]	(50,60]	(180,190]
184473	West	-4.61681457102548	48.3392083341234	7.16634304383962	53.1384403713786	187.313757596989	(7,7.2]	(50,60]	(180,190]
184474	West	-4.61681188102548	48.3392083341234	7.19339101247732	49.7387086807021	177.64158578397	(7,7.2]	(40,50]	(170,180]
184475	West	-4.61680919102548	48.3392083341234	7.17791657189053	53.0078581179903	161.968022766827	(7,7.2]	(50,60]	(160,170]
184476	West	-4.61680650102548	48.3392083341234	7.06503273805829	59.5144617898464	163.373547184721	(7,7.2]	(50,60]	(160,170]
184477	West	-4.61680381102548	48.3392083341234	6.9511854250556	69.5432982963773	155.1287923621	(6.8,7]	(60,70]	(150,160]
184478	West	-4.61680112102548	48.3392083341234	6.60521434776793	75.9609315194511	150.234301228169	(6.6,6.8]	(70,80]	(150,160]
184479	West	-4.61679843102548	48.3392083341234	5.88693159516032	75.6082507299723	159.881075961545	(5.8,6]	(70,80]	(150,160]
184480	West	-4.61679574102548	48.3392083341234	5.92864357713353	71.8968553377443	174.015290323016	(5.8,6]	(70,80]	(170,180]
184481	West	-4.61679305102548	48.3392083341234	5.88671222538141	69.8180100197888	172.334250739568	(5.8,6]	(60,70]	(170,180]
184482	West	-4.61679036102548	48.3392083341234	5.76667633987474	68.6193627580882	164.872711166876	(5.6,5.8]	(60,70]	(160,170]
184483	West	-4.61678767102548	48.3392083341234	5.65623783853708	65.1358372994988	166.396087713135	(5.6,5.8]	(60,70]	(160,170]
184484	West	-4.61678498102548	48.3392083341234	5.60255248951949	60.140640045253	167.047376036308	(5.6,5.8]	(60,70]	(160,170]
184485	West	-4.61678229102548	48.3392083341234	5.56231090756027	51.8428321609459	167.931480477397	(5.4,5.6]	(50,60]	(160,170]
184486	West	-4.61677960102548	48.3392083341234	5.56004017349293	38.0764973140994	173.000423221727	(5.4,5.6]	(30,40]	(170,180]
184487	West	-4.61677691102548	48.3392083341234	5.46791482608911	31.9809752573788	223.654398546485	(5.4,5.6]	(30,40]	(220,230]
184488	West	-4.61677422102548	48.3392083341234	5.71466326932768	46.5126508421161	235.527146072156	(5.6,5.8]	(40,50]	(230,240]
184489	West	-4.61677153102548	48.3392083341234	5.90104147170427	48.5452387539379	212.863604300357	(5.8,6]	(40,50]	(210,220]
184490	West	-4.61676884102548	48.3392083341234	5.97795930988854	46.6331429427816	213.571882610909	(5.8,6]	(40,50]	(210,220]
184491	West	-4.61676615102548	48.3392083341234	6.14626748262823	47.3147091958904	245.099307375473	(6,6.2]	(40,50]	(240,250]
184492	West	-4.61676346102548	48.3392083341234	6.46045658825363	55.4656990004632	250.214005910305	(6.4,6.6]	(50,60]	(250,260]
184493	West	-4.61676077102548	48.3392083341234	6.68691191345132	56.8830301254123	227.506574377045	(6.6,6.8]	(50,60]	(220,230]
184494	West	-4.61675808102548	48.3392083341234	6.81946806154895	54.4877359411881	207.984503182653	(6.8,7]	(50,60]	(200,210]
184495	West	-4.61675539102548	48.3392083341234	6.91470372068679	48.5464114465542	203.696485846641	(6.8,7]	(40,50]	(200,210]
184496	West	-4.61675270102548	48.3392083341234	6.98070345295605	41.6152853178517	186.860820008772	(6.8,7]	(40,50]	(180,190]
184497	West	-4.61675001102548	48.3392083341234	6.95003282740666	41.2616948862035	171.682489510359	(6.8,7]	(40,50]	(170,180]
184498	West	-4.61674732102548	48.3392083341234	6.8840979607893	42.273404522605	167.679936744956	(6.8,7]	(40,50]	(160,170]
184499	West	-4.61674463102548	48.3392083341234	6.82012227003788	39.3090245482833	162.29466876421	(6.8,7]	(30,40]	(160,170]
184500	West	-4.61674194102548	48.3392083341234	6.78726477369273	30.9015541750955	165.81878466641	(6.6,6.8]	(30,40]	(160,170]
184501	West	-4.61673925102548	48.3392083341234	6.78785017314897	21.3476842747586	171.965099278018	(6.6,6.8]	(20,30]	(170,180]
184502	West	-4.61673656102548	48.3392083341234	6.78238767742386	8.72655894551999	241.380233111057	(6.6,6.8]	(0,10]	(240,250]
184503	West	-4.61673387102548	48.3392083341234	6.83426796821152	45.246690535398	307.998501288571	(6.8,7]	(40,50]	(300,310]
184504	West	-4.61673118102548	48.3392083341234	7.11624248546136	66.6226626847942	309.905882411523	(7,7.2]	(60,70]	(300,310]
184505	West	-4.61672849102548	48.3392083341234	7.6021412821904	69.4874930747005	312.916333694376	(7.6,7.8]	(60,70]	(310,320]
184506	West	-4.61672580102548	48.3392083341234	7.9614825688106	63.3434679883677	319.643198222365	(7.8,8]	(60,70]	(310,320]
184536	West	-4.61664510102548	48.3392083341234	7.94925648974454	28.792681357471	154.936403929426	(7.8,8]	(20,30]	(150,160]
184537	West	-4.61664241102548	48.3392083341234	7.90887238391163	22.4073588138293	173.614334153022	(7.8,8]	(20,30]	(170,180]
184538	West	-4.61663972102548	48.3392083341234	7.92224585290575	24.7720429408021	199.725642899381	(7.8,8]	(20,30]	(190,200]
184544	West	-4.61662358102548	48.3392083341234	7.93526921549486	26.5083022585205	245.475103975524	(7.8,8]	(20,30]	(240,250]
184571	West	-4.61655095102548	48.3392083341234	7.69589525119103	10.6241378697819	168.50545091807	(7.6,7.8]	(10,20]	(160,170]
184572	West	-4.61654826102548	48.3392083341234	7.6902533714507	9.00569001999144	177.283245644873	(7.6,7.8]	(0,10]	(170,180]
184573	West	-4.61654557102548	48.3392083341234	7.69185946690485	7.74004517366498	192.603172197093	(7.6,7.8]	(0,10]	(190,200]
184574	West	-4.61654288102548	48.3392083341234	7.70104922836216	6.97294744182431	216.899328859771	(7.6,7.8]	(0,10]	(210,220]
184575	West	-4.61654019102548	48.3392083341234	7.71794877680304	5.580989834373	230.289844851648	(7.6,7.8]	(0,10]	(230,240]
184576	West	-4.61653750102548	48.3392083341234	7.72822988372228	4.80145767200741	190.654658993327	(7.6,7.8]	(0,10]	(190,200]
184577	West	-4.61653481102548	48.3392083341234	7.73111974078569	8.99527493275978	177.379604206388	(7.6,7.8]	(0,10]	(170,180]
184589	West	-4.61650253102548	48.3392083341234	7.99488094300998	27.2446067156118	92.6811327301097	(7.8,8]	(20,30]	(90,100]
184590	West	-4.61649984102548	48.3392083341234	7.87146371294409	21.1307345665446	113.353037381431	(7.8,8]	(20,30]	(110,120]
184591	West	-4.61649715102548	48.3392083341234	7.84015373689122	18.5199673099028	162.483108240297	(7.8,8]	(10,20]	(160,170]
184592	West	-4.61649446102548	48.3392083341234	7.81753648870525	23.849041965301	167.840706705238	(7.8,8]	(20,30]	(160,170]
184593	West	-4.61649177102548	48.3392083341234	7.78751910634006	23.4940118112953	173.569915069564	(7.6,7.8]	(20,30]	(170,180]
184594	West	-4.61648908102548	48.3392083341234	7.79577832922514	22.0737030187424	193.089426744708	(7.6,7.8]	(20,30]	(190,200]
184595	West	-4.61648639102548	48.3392083341234	7.86807729024364	28.9170652084963	223.953885195663	(7.8,8]	(20,30]	(220,230]
184596	West	-4.61648370102548	48.3392083341234	7.99766026166886	25.1882009933756	228.03793539438	(7.8,8]	(20,30]	(220,230]
184597	West	-4.61648101102548	48.3392083341234	7.98293987608292	14.1916917026647	209.198245945837	(7.8,8]	(10,20]	(200,210]
184614	West	-4.61643528102548	48.3392083341234	7.81328490199411	62.3348798887964	158.641048200071	(7.8,8]	(60,70]	(150,160]
184615	West	-4.61643259102548	48.3392083341234	7.7696837359669	57.466911122857	175.215378503431	(7.6,7.8]	(50,60]	(170,180]
184616	West	-4.61642990102548	48.3392083341234	7.88569030591052	48.2308685075061	188.104395182059	(7.8,8]	(40,50]	(180,190]
184617	West	-4.61642721102548	48.3392083341234	7.93547948185381	41.9744160257608	196.892873378702	(7.8,8]	(40,50]	(190,200]
184623	West	-4.61641107102548	48.3392083341234	7.9542364423731	52.1178858023027	165.565667380763	(7.8,8]	(50,60]	(160,170]
184624	West	-4.61640838102548	48.3392083341234	7.86751230985922	54.7720125290913	158.467174710501	(7.8,8]	(50,60]	(150,160]
184625	West	-4.61640569102548	48.3392083341234	7.73211573457183	57.6913075902358	160.832600126261	(7.6,7.8]	(50,60]	(160,170]
184626	West	-4.61640300102548	48.3392083341234	7.68430999061883	59.8553467206857	167.337963820421	(7.6,7.8]	(50,60]	(160,170]
184627	West	-4.61640031102548	48.3392083341234	7.58944736334351	59.8585527005892	178.361953996525	(7.4,7.6]	(50,60]	(170,180]
184628	West	-4.61639762102548	48.3392083341234	7.65377557610015	60.2249569541118	186.5516225049	(7.6,7.8]	(60,70]	(180,190]
184629	West	-4.61639493102548	48.3392083341234	7.67509814278382	61.4814848181753	183.681095696536	(7.6,7.8]	(60,70]	(180,190]
184630	West	-4.61639224102548	48.3392083341234	7.69412581579679	63.3206313626035	174.769155730259	(7.6,7.8]	(60,70]	(170,180]
184631	West	-4.61638955102548	48.3392083341234	7.60846059247428	68.1197870282913	144.504172794034	(7.6,7.8]	(60,70]	(140,150]
184632	West	-4.61638686102548	48.3392083341234	7.09406212684809	70.019807861837	125.152208982796	(7,7.2]	(70,80]	(120,130]
184633	West	-4.61638417102548	48.3392083341234	6.6930705052608	51.9781490315533	124.278835938775	(6.6,6.8]	(50,60]	(120,130]
184634	West	-4.61638148102548	48.3392083341234	6.72098741550975	9.44327601867578	194.727543617073	(6.6,6.8]	(0,10]	(190,200]
184635	West	-4.61637879102548	48.3392083341234	6.75989731103314	18.3606279912482	104.341952388412	(6.6,6.8]	(10,20]	(100,110]
184636	West	-4.61637610102548	48.3392083341234	6.57048494716533	37.0876971790751	102.902615473761	(6.4,6.6]	(30,40]	(100,110]
184637	West	-4.61637341102548	48.3392083341234	6.42148111791494	31.0395286922971	120.20896087585	(6.4,6.6]	(30,40]	(120,130]
184638	West	-4.61637072102548	48.3392083341234	6.34161399374099	27.1677790953831	143.992448470871	(6.2,6.4]	(20,30]	(140,150]
184639	West	-4.61636803102548	48.3392083341234	6.27532801674902	24.2319070459338	153.342913160893	(6.2,6.4]	(20,30]	(150,160]
184640	West	-4.61636534102548	48.3392083341234	6.26093484718257	17.3675243793234	164.913615994155	(6.2,6.4]	(10,20]	(160,170]
184641	West	-4.61636265102548	48.3392083341234	6.26922417941639	14.7617978822687	186.405538892716	(6.2,6.4]	(10,20]	(180,190]
184642	West	-4.61635996102548	48.3392083341234	6.28018165581097	16.9531248625197	219.562388535804	(6.2,6.4]	(10,20]	(210,220]
184643	West	-4.61635727102548	48.3392083341234	6.339950894741	20.6206073910236	250.38467094562	(6.2,6.4]	(20,30]	(250,260]
184644	West	-4.61635458102548	48.3392083341234	6.42678165889128	14.0278901140428	255.545386643716	(6.4,6.6]	(10,20]	(250,260]
184645	West	-4.61635189102548	48.3392083341234	6.44542325710465	7.30909932957562	161.649589373627	(6.4,6.6]	(0,10]	(160,170]
184646	West	-4.61634920102548	48.3392083341234	6.42480901805816	15.3782851433365	147.783678414186	(6.4,6.6]	(10,20]	(140,150]
184647	West	-4.61634651102548	48.3392083341234	6.40022607859821	18.741172292448	162.539658911866	(6.4,6.6]	(10,20]	(160,170]
184648	West	-4.61634382102548	48.3392083341234	6.39090424650735	22.7960977651483	176.549195978238	(6.2,6.4]	(20,30]	(170,180]
184649	West	-4.61634113102548	48.3392083341234	6.384954638345	34.1703475510432	186.719551494364	(6.2,6.4]	(30,40]	(180,190]
184650	West	-4.61633844102548	48.3392083341234	6.40297361611495	45.6598075669573	185.572162585797	(6.4,6.6]	(40,50]	(180,190]
184651	West	-4.61633575102548	48.3392083341234	6.40825526238542	48.6878435951849	178.127920356883	(6.4,6.6]	(40,50]	(170,180]
184652	West	-4.61633306102548	48.3392083341234	6.38452368167287	47.3910204887273	169.541076659807	(6.2,6.4]	(40,50]	(160,170]
184653	West	-4.61633037102548	48.3392083341234	6.33416535796165	49.2202581082195	158.770138305768	(6.2,6.4]	(40,50]	(150,160]
184654	West	-4.61632768102548	48.3392083341234	6.2079789947296	52.488059790141	148.982912638367	(6.2,6.4]	(50,60]	(140,150]
184655	West	-4.61632499102548	48.3392083341234	6.05384119818626	47.2749080262647	145.569538702836	(6,6.2]	(40,50]	(140,150]
184656	West	-4.61632230102548	48.3392083341234	5.9537787749563	25.8784902660567	208.758868565662	(5.8,6]	(20,30]	(200,210]
184657	West	-4.61631961102548	48.3392083341234	6.15266132558785	44.9682105555891	257.068698159853	(6,6.2]	(40,50]	(250,260]
184658	West	-4.61631692102548	48.3392083341234	6.35139509482706	38.5465033479953	231.679023799926	(6.2,6.4]	(30,40]	(230,240]
184659	West	-4.61631423102548	48.3392083341234	6.3672245368673	39.9021685714394	192.578076073744	(6.2,6.4]	(30,40]	(190,200]
184660	West	-4.61631154102548	48.3392083341234	6.40010400955645	43.1411381439763	192.661516409205	(6.4,6.6]	(40,50]	(190,200]
184661	West	-4.61630885102548	48.3392083341234	6.46410348546793	42.9978543725947	196.302669747838	(6.4,6.6]	(40,50]	(190,200]
184662	West	-4.61630616102548	48.3392083341234	6.52320499685077	39.6155489882884	192.511146792746	(6.4,6.6]	(30,40]	(190,200]
184663	West	-4.61630347102548	48.3392083341234	6.54941433413241	31.9092529149804	176.415557731308	(6.4,6.6]	(30,40]	(170,180]
184664	West	-4.61630078102548	48.3392083341234	6.52465007215728	28.9005558413206	157.460804823801	(6.4,6.6]	(20,30]	(150,160]
186096	West	-4.61724228102548	48.3392065441234	7.89317690714636	17.5768153120641	182.084073408557	(7.8,8]	(10,20]	(180,190]
186104	West	-4.61722076102548	48.3392065441234	7.98264790237079	47.3933344753889	149.139766285862	(7.8,8]	(40,50]	(140,150]
186105	West	-4.61721807102548	48.3392065441234	7.89907512037428	47.3317926609147	150.376798524104	(7.8,8]	(40,50]	(150,160]
186106	West	-4.61721538102548	48.3392065441234	7.76856195690228	50.5983330016803	149.690460058867	(7.6,7.8]	(50,60]	(140,150]
186107	West	-4.61721269102548	48.3392065441234	7.65612841915681	52.3374903506091	153.955313724025	(7.6,7.8]	(50,60]	(150,160]
186108	West	-4.61721000102548	48.3392065441234	7.5547674661282	53.8147063635181	153.665155936803	(7.4,7.6]	(50,60]	(150,160]
186109	West	-4.61720731102548	48.3392065441234	7.41523884945397	64.4466925109216	134.978640298352	(7.4,7.6]	(60,70]	(130,140]
186110	West	-4.61720462102548	48.3392065441234	6.90332592092466	69.4071222242797	131.433113130588	(6.8,7]	(60,70]	(130,140]
186111	West	-4.61720193102548	48.3392065441234	6.55819783870213	63.8090723893578	141.031031733823	(6.4,6.6]	(60,70]	(140,150]
186112	West	-4.61719924102548	48.3392065441234	6.38752515901434	59.2338382583768	147.252940470727	(6.2,6.4]	(50,60]	(140,150]
186113	West	-4.61719655102548	48.3392065441234	6.22747572558263	61.1630316281411	145.142848851883	(6.2,6.4]	(60,70]	(140,150]
186114	West	-4.61719386102548	48.3392065441234	6.06319222475492	64.8372802826605	138.254636467912	(6,6.2]	(60,70]	(130,140]
186115	West	-4.61719117102548	48.3392065441234	5.66503636176778	65.4565398421436	134.286036130266	(5.6,5.8]	(60,70]	(130,140]
186116	West	-4.61718848102548	48.3392065441234	5.35234537073925	41.8310647437222	164.801294696138	(5.2,5.4]	(40,50]	(160,170]
186117	West	-4.61718579102548	48.3392065441234	5.56402851471921	70.4142591444809	272.729141849914	(5.4,5.6]	(70,80]	(270,280]
186118	West	-4.61718310102548	48.3392065441234	6.53164131236448	76.3431321386768	281.671161164582	(6.4,6.6]	(70,80]	(280,290]
186119	West	-4.61718041102548	48.3392065441234	7.2213660925968	69.2699541237906	294.20213347205	(7.2,7.4]	(60,70]	(290,300]
186120	West	-4.61717772102548	48.3392065441234	7.51692703270089	52.7017141422581	312.071095300921	(7.4,7.6]	(50,60]	(310,320]
186121	West	-4.61717503102548	48.3392065441234	7.60754445055174	33.1397432624901	318.601688583161	(7.6,7.8]	(30,40]	(310,320]
186122	West	-4.61717234102548	48.3392065441234	7.65335472625198	39.1077633746993	302.357266593742	(7.6,7.8]	(30,40]	(300,310]
186123	West	-4.61716965102548	48.3392065441234	7.87365787172749	57.956645550516	294.307195583358	(7.8,8]	(50,60]	(290,300]
186134	West	-4.61714006102548	48.3392065441234	7.95671449521292	17.0542820030099	195.211736454576	(7.8,8]	(10,20]	(190,200]
186140	West	-4.61712392102548	48.3392065441234	7.97339389045006	17.2637999186433	88.0444236662956	(7.8,8]	(10,20]	(80,90]
186163	West	-4.61706205102548	48.3392065441234	6.95299850628924	9.14645885087314	227.398952888248	(6.8,7]	(0,10]	(220,230]
186177	West	-4.61702439102548	48.3392065441234	7.69199162001861	42.028999600947	149.785661066738	(7.6,7.8]	(40,50]	(140,150]
186178	West	-4.61702170102548	48.3392065441234	7.57998948699237	39.6857028235437	152.854306897942	(7.4,7.6]	(30,40]	(150,160]
186179	West	-4.61701901102548	48.3392065441234	7.53775045459718	36.4807426322033	156.474088972739	(7.4,7.6]	(30,40]	(150,160]
186180	West	-4.61701632102548	48.3392065441234	7.48270596114278	37.1550803547917	150.178556642607	(7.4,7.6]	(30,40]	(150,160]
186181	West	-4.61701363102548	48.3392065441234	7.39262453978907	36.1063423716628	147.128252541476	(7.2,7.4]	(30,40]	(140,150]
186182	West	-4.61701094102548	48.3392065441234	7.32313578919945	31.4463611403455	154.413496631172	(7.2,7.4]	(30,40]	(150,160]
186183	West	-4.61700825102548	48.3392065441234	7.29478478516747	31.1869118375886	169.520256881482	(7.2,7.4]	(30,40]	(160,170]
186184	West	-4.61700556102548	48.3392065441234	7.28549703865807	35.6122150824155	171.751048324089	(7.2,7.4]	(30,40]	(170,180]
186185	West	-4.61700287102548	48.3392065441234	7.25552304562208	37.5871789445679	161.1367086042	(7.2,7.4]	(30,40]	(160,170]
186186	West	-4.61700018102548	48.3392065441234	7.18389879384505	36.9451076337329	152.785534857778	(7,7.2]	(30,40]	(150,160]
186187	West	-4.61699749102548	48.3392065441234	7.12253908161719	36.1382990487251	151.929116980021	(7,7.2]	(30,40]	(150,160]
186188	West	-4.61699480102548	48.3392065441234	7.04028509563835	37.2645813259539	150.482601094477	(7,7.2]	(30,40]	(150,160]
186189	West	-4.61699211102548	48.3392065441234	6.95729689512507	38.086256876988	152.312570429248	(6.8,7]	(30,40]	(150,160]
186190	West	-4.61698942102548	48.3392065441234	6.89839207525641	38.4503985871688	157.816643133848	(6.8,7]	(30,40]	(150,160]
186191	West	-4.61698673102548	48.3392065441234	6.84912013668715	39.4197556415532	160.299081063272	(6.8,7]	(30,40]	(160,170]
186192	West	-4.61698404102548	48.3392065441234	6.79573019883517	40.406050299791	161.375614871892	(6.6,6.8]	(40,50]	(160,170]
186193	West	-4.61698135102548	48.3392065441234	6.74524973029004	41.65796364982	161.853227442162	(6.6,6.8]	(40,50]	(160,170]
186194	West	-4.61697866102548	48.3392065441234	6.69205341552891	43.5187016844592	157.447569514604	(6.6,6.8]	(40,50]	(150,160]
186195	West	-4.61697597102548	48.3392065441234	6.60161717512049	43.6149805353222	152.218615722904	(6.6,6.8]	(40,50]	(150,160]
186196	West	-4.61697328102548	48.3392065441234	6.50219437408395	40.1256603672781	150.908644257836	(6.4,6.6]	(40,50]	(150,160]
186197	West	-4.61697059102548	48.3392065441234	6.42372391637066	36.109312612761	149.128517816126	(6.4,6.6]	(30,40]	(140,150]
186198	West	-4.61696790102548	48.3392065441234	6.34906839320072	35.1595048661408	142.88181727175	(6.2,6.4]	(30,40]	(140,150]
186199	West	-4.61696521102548	48.3392065441234	6.26518025730027	33.6592787659996	144.99768457919	(6.2,6.4]	(30,40]	(140,150]
186200	West	-4.61696252102548	48.3392065441234	6.21281486283677	32.1891827043938	157.590203352402	(6.2,6.4]	(30,40]	(150,160]
186201	West	-4.61695983102548	48.3392065441234	6.1462559031349	31.3261140365622	181.970575863542	(6,6.2]	(30,40]	(180,190]
186202	West	-4.61695714102548	48.3392065441234	6.15779426895745	24.3078198704211	222.473008675626	(6,6.2]	(20,30]	(220,230]
186203	West	-4.61695445102548	48.3392065441234	6.22701059608406	29.4829952378646	297.011096668986	(6.2,6.4]	(20,30]	(290,300]
186204	West	-4.61695176102548	48.3392065441234	6.38429711309174	46.2714046368122	307.231751768348	(6.2,6.4]	(40,50]	(300,310]
186205	West	-4.61694907102548	48.3392065441234	6.61698261104293	45.4858036130804	302.500109498648	(6.6,6.8]	(40,50]	(300,310]
186206	West	-4.61694638102548	48.3392065441234	6.77745688660859	31.3547293145226	288.616188364173	(6.6,6.8]	(30,40]	(280,290]
186207	West	-4.61694369102548	48.3392065441234	6.87027973322803	25.2281612535303	244.135337067639	(6.8,7]	(20,30]	(240,250]
186208	West	-4.61694100102548	48.3392065441234	6.95221757769745	30.4934790243861	241.843786331824	(6.8,7]	(30,40]	(240,250]
186209	West	-4.61693831102548	48.3392065441234	7.05196788216216	29.4459330709533	271.26507877194	(7,7.2]	(20,30]	(270,280]
186210	West	-4.61693562102548	48.3392065441234	7.15491204507997	11.7390161945249	315.087078929034	(7,7.2]	(10,20]	(310,320]
186211	West	-4.61693293102548	48.3392065441234	7.11892747283771	7.99552232256891	66.1918802563614	(7,7.2]	(0,10]	(60,70]
186212	West	-4.61693024102548	48.3392065441234	7.10052230623555	2.3029288122557	29.7585868836626	(7,7.2]	(0,10]	(20,30]
186213	West	-4.61692755102548	48.3392065441234	7.10227971419927	3.40683670985578	14.9534627870832	(7,7.2]	(0,10]	(10,20]
186214	West	-4.61692486102548	48.3392065441234	7.09075565004658	6.16174292743747	114.323260422549	(7,7.2]	(0,10]	(110,120]
186215	West	-4.61692217102548	48.3392065441234	7.06579607548757	14.8136030623126	177.624039977651	(7,7.2]	(10,20]	(170,180]
186216	West	-4.61691948102548	48.3392065441234	7.07554663255523	24.6104207997452	190.159995827573	(7,7.2]	(20,30]	(190,200]
186217	West	-4.61691679102548	48.3392065441234	7.10191182437164	30.1136616616406	196.725057189745	(7,7.2]	(30,40]	(190,200]
186218	West	-4.61691410102548	48.3392065441234	7.18964011836472	36.507986851947	203.416330080122	(7,7.2]	(30,40]	(200,210]
186219	West	-4.61691141102548	48.3392065441234	7.26640582901097	41.4093339137433	195.630188546629	(7.2,7.4]	(40,50]	(190,200]
186220	West	-4.61690872102548	48.3392065441234	7.28901177209027	44.8774036560454	184.033487962576	(7.2,7.4]	(40,50]	(180,190]
186221	West	-4.61690603102548	48.3392065441234	7.2758355338126	46.4089216172063	171.55385252498	(7.2,7.4]	(40,50]	(170,180]
186222	West	-4.61690334102548	48.3392065441234	7.20375555903291	46.4704991057947	166.276184391952	(7.2,7.4]	(40,50]	(160,170]
186223	West	-4.61690065102548	48.3392065441234	7.15345825983837	46.6383567587464	165.053256961328	(7,7.2]	(40,50]	(160,170]
186224	West	-4.61689796102548	48.3392065441234	7.08689435061413	46.8410363634162	160.369581438356	(7,7.2]	(40,50]	(160,170]
186225	West	-4.61689527102548	48.3392065441234	6.99777630107276	46.8112491627626	159.463934669947	(6.8,7]	(40,50]	(150,160]
186226	West	-4.61689258102548	48.3392065441234	6.90676693323715	47.8177943105262	159.635597890763	(6.8,7]	(40,50]	(150,160]
186227	West	-4.61688989102548	48.3392065441234	6.82009453823779	46.3161371739009	160.62004721364	(6.8,7]	(40,50]	(160,170]
186228	West	-4.61688720102548	48.3392065441234	6.76462005516187	44.9403685717421	160.656433225045	(6.6,6.8]	(40,50]	(160,170]
186229	West	-4.61688451102548	48.3392065441234	6.68253891666612	54.2731747466459	184.900880909381	(6.6,6.8]	(50,60]	(180,190]
186230	West	-4.61688182102548	48.3392065441234	6.85374630140674	64.8147786269369	191.034084246834	(6.8,7]	(60,70]	(190,200]
186231	West	-4.61687913102548	48.3392065441234	6.91448476414492	66.0554705178846	180.384686668672	(6.8,7]	(60,70]	(180,190]
186232	West	-4.61687644102548	48.3392065441234	6.8690778482865	64.2543878550706	173.496426679525	(6.8,7]	(60,70]	(170,180]
186233	West	-4.61687375102548	48.3392065441234	6.77873393896086	64.0465833832908	175.201694020566	(6.6,6.8]	(60,70]	(170,180]
186234	West	-4.61687106102548	48.3392065441234	6.72478776437293	65.9587096743667	175.556037540421	(6.6,6.8]	(60,70]	(170,180]
186235	West	-4.61686837102548	48.3392065441234	6.66039968654622	67.2336389448377	166.925922106384	(6.6,6.8]	(60,70]	(160,170]
186236	West	-4.61686568102548	48.3392065441234	6.47024728420838	66.6627687575449	177.986495497328	(6.4,6.6]	(60,70]	(170,180]
186237	West	-4.61686299102548	48.3392065441234	6.59234739672095	69.2044573074167	191.097424200811	(6.4,6.6]	(60,70]	(190,200]
186238	West	-4.61686030102548	48.3392065441234	6.62740661027655	71.2338008107857	182.922680661253	(6.6,6.8]	(70,80]	(180,190]
186239	West	-4.61685761102548	48.3392065441234	6.61401546370414	71.0983473797051	177.189077468504	(6.6,6.8]	(70,80]	(170,180]
186240	West	-4.61685492102548	48.3392065441234	6.57290843277615	66.604094130961	173.668763387848	(6.4,6.6]	(60,70]	(170,180]
186241	West	-4.61685223102548	48.3392065441234	6.61476883713891	54.5874276286546	178.798497474578	(6.6,6.8]	(50,60]	(170,180]
186242	West	-4.61684954102548	48.3392065441234	6.66385681374685	42.1350520290505	197.147518276426	(6.6,6.8]	(40,50]	(190,200]
186243	West	-4.61684685102548	48.3392065441234	6.73957258182647	34.7324794715852	199.751497795484	(6.6,6.8]	(30,40]	(190,200]
186244	West	-4.61684416102548	48.3392065441234	6.78859192460217	29.802129674623	200.52465259981	(6.6,6.8]	(20,30]	(200,210]
186245	West	-4.61684147102548	48.3392065441234	6.85539220927736	29.7734825808226	195.230681729834	(6.8,7]	(20,30]	(190,200]
186246	West	-4.61683878102548	48.3392065441234	6.87696387116599	34.6453056782455	183.425423283796	(6.8,7]	(30,40]	(180,190]
186247	West	-4.61683609102548	48.3392065441234	6.86137778269448	41.8770341350157	187.741636280269	(6.8,7]	(40,50]	(180,190]
186248	West	-4.61683340102548	48.3392065441234	6.91286102853245	49.4733844437079	195.581093483949	(6.8,7]	(40,50]	(190,200]
186249	West	-4.61683071102548	48.3392065441234	7.03610425214648	53.9383598826496	176.123173333257	(7,7.2]	(50,60]	(170,180]
186250	West	-4.61682802102548	48.3392065441234	6.84069986230569	58.8130084666968	159.602244576476	(6.8,7]	(50,60]	(150,160]
186251	West	-4.61682533102548	48.3392065441234	6.70591835406455	60.1019340106182	159.313913900295	(6.6,6.8]	(60,70]	(150,160]
186252	West	-4.61682264102548	48.3392065441234	6.54544346846262	60.1392620141628	175.08995288313	(6.4,6.6]	(60,70]	(170,180]
186253	West	-4.61681995102548	48.3392065441234	6.67353043778839	63.4043069694218	188.793846603612	(6.6,6.8]	(60,70]	(180,190]
186254	West	-4.61681726102548	48.3392065441234	6.77030383476253	65.6505802614326	186.979589799935	(6.6,6.8]	(60,70]	(180,190]
186255	West	-4.61681457102548	48.3392065441234	6.86297312066506	66.4916677545268	186.683124129412	(6.8,7]	(60,70]	(180,190]
186256	West	-4.61681188102548	48.3392065441234	6.92233105712287	66.7377065345097	178.861404372967	(6.8,7]	(60,70]	(170,180]
186257	West	-4.61680919102548	48.3392065441234	6.8373175486604	68.3700847895114	165.893084077446	(6.8,7]	(60,70]	(160,170]
186258	West	-4.61680650102548	48.3392065441234	6.63364872405996	70.6934568003105	161.506674659609	(6.6,6.8]	(70,80]	(160,170]
186259	West	-4.61680381102548	48.3392065441234	6.47766003642156	73.3101279069744	149.738242103422	(6.4,6.6]	(70,80]	(140,150]
186260	West	-4.61680112102548	48.3392065441234	5.75820421775344	71.4385479757389	140.61393848563	(5.6,5.8]	(70,80]	(140,150]
186261	West	-4.61679843102548	48.3392065441234	5.57582447280274	54.1238129122551	155.130152592001	(5.4,5.6]	(50,60]	(150,160]
186262	West	-4.61679574102548	48.3392065441234	5.60415829266794	37.8691933075989	180.722603367985	(5.6,5.8]	(30,40]	(180,190]
186263	West	-4.61679305102548	48.3392065441234	5.57393618682823	40.0627957699487	156.192004717893	(5.4,5.6]	(40,50]	(150,160]
186264	West	-4.61679036102548	48.3392065441234	5.49929934174182	41.3889559192172	149.334344239601	(5.4,5.6]	(40,50]	(140,150]
186265	West	-4.61678767102548	48.3392065441234	5.43407360138495	36.070691252979	157.80451433633	(5.4,5.6]	(30,40]	(150,160]
186266	West	-4.61678498102548	48.3392065441234	5.39061836809556	26.927914872689	173.59994699836	(5.2,5.4]	(20,30]	(170,180]
186267	West	-4.61678229102548	48.3392065441234	5.40229342411886	18.0676782524338	185.165712975141	(5.4,5.6]	(10,20]	(180,190]
186268	West	-4.61677960102548	48.3392065441234	5.39473387782811	19.1442625869505	261.075980320178	(5.2,5.4]	(10,20]	(260,270]
186269	West	-4.61677691102548	48.3392065441234	5.61693078587924	27.4170707889086	284.763769596076	(5.6,5.8]	(20,30]	(280,290]
186270	West	-4.61677422102548	48.3392065441234	5.64500648450203	20.5173096941204	232.882553383198	(5.6,5.8]	(20,30]	(230,240]
186271	West	-4.61677153102548	48.3392065441234	5.69932600571217	36.9170366979583	221.544174824701	(5.6,5.8]	(30,40]	(220,230]
186272	West	-4.61676884102548	48.3392065441234	5.76687495815061	46.0561025498566	249.886493250077	(5.6,5.8]	(40,50]	(240,250]
186273	West	-4.61676615102548	48.3392065441234	6.07867123604562	47.1702645478341	250.710034251685	(6,6.2]	(40,50]	(250,260]
186274	West	-4.61676346102548	48.3392065441234	6.24589610845419	49.5112968773075	224.707958957	(6.2,6.4]	(40,50]	(220,230]
186275	West	-4.61676077102548	48.3392065441234	6.42021022441763	54.4466095586713	218.762305698435	(6.4,6.6]	(50,60]	(210,220]
186276	West	-4.61675808102548	48.3392065441234	6.56297154068631	51.993706659252	230.765187965757	(6.4,6.6]	(50,60]	(230,240]
186277	West	-4.61675539102548	48.3392065441234	6.78000860449624	39.7969773882086	241.768028919744	(6.6,6.8]	(30,40]	(240,250]
186278	West	-4.61675270102548	48.3392065441234	6.85890749310217	15.1732090850777	238.018039400957	(6.8,7]	(10,20]	(230,240]
186279	West	-4.61675001102548	48.3392065441234	6.85676828434712	5.63015050381375	357.832915402499	(6.8,7]	(0,10]	(350,360]
186280	West	-4.61674732102548	48.3392065441234	6.83782890365488	21.3184278452137	8.67826315532914	(6.8,7]	(20,30]	(0,10]
186281	West	-4.61674463102548	48.3392065441234	6.8330089598017	30.9680314789924	6.42637426831647	(6.8,7]	(30,40]	(0,10]
186282	West	-4.61674194102548	48.3392065441234	6.82127975821047	35.0929806357749	2.00926450928886	(6.8,7]	(30,40]	(0,10]
186283	West	-4.61673925102548	48.3392065441234	6.82175523352986	37.9941498150858	353.458690732744	(6.8,7]	(30,40]	(350,360]
186284	West	-4.61673656102548	48.3392065441234	6.8624586541566	43.4039653009731	335.740935561862	(6.8,7]	(40,50]	(330,340]
186285	West	-4.61673387102548	48.3392065441234	7.05100742171836	58.9500026693767	305.970406333042	(7,7.2]	(50,60]	(300,310]
186286	West	-4.61673118102548	48.3392065441234	7.54290260252762	68.0400329435526	296.600862335595	(7.4,7.6]	(60,70]	(290,300]
186287	West	-4.61672849102548	48.3392065441234	7.99796300764876	64.8191043131197	300.794983723255	(7.8,8]	(60,70]	(300,310]
186314	West	-4.61665586102548	48.3392065441234	7.96519563106681	32.0081566988226	156.397115201956	(7.8,8]	(30,40]	(150,160]
186315	West	-4.61665317102548	48.3392065441234	7.93517313166731	35.3956718723227	167.234935145751	(7.8,8]	(30,40]	(160,170]
186316	West	-4.61665048102548	48.3392065441234	7.92984657207877	34.8360891271301	165.973015040139	(7.8,8]	(30,40]	(160,170]
186317	West	-4.61664779102548	48.3392065441234	7.91870029182242	30.3930996051588	159.193349404941	(7.8,8]	(30,40]	(150,160]
186318	West	-4.61664510102548	48.3392065441234	7.8961063454812	25.2784043454707	162.494581346128	(7.8,8]	(20,30]	(160,170]
186319	West	-4.61664241102548	48.3392065441234	7.90167044268432	22.8675130365836	177.266053020291	(7.8,8]	(20,30]	(170,180]
186320	West	-4.61663972102548	48.3392065441234	7.90846177422505	26.4389668120828	183.565300962726	(7.8,8]	(20,30]	(180,190]
186321	West	-4.61663703102548	48.3392065441234	7.86294811577975	34.3041761558729	192.620375946315	(7.8,8]	(30,40]	(190,200]
186322	West	-4.61663434102548	48.3392065441234	7.87983243879415	41.610069151494	191.084966028806	(7.8,8]	(40,50]	(190,200]
186323	West	-4.61663165102548	48.3392065441234	7.88933293906678	49.7560032427323	178.33926033415	(7.8,8]	(40,50]	(170,180]
186324	West	-4.61662896102548	48.3392065441234	7.84954921523196	50.0000841945473	170.994647775263	(7.8,8]	(50,60]	(170,180]
186325	West	-4.61662627102548	48.3392065441234	7.76383060865786	27.5650653626002	213.087747774068	(7.6,7.8]	(20,30]	(210,220]
186353	West	-4.61655095102548	48.3392065441234	7.66187126071113	7.47003409559645	173.400260136859	(7.6,7.8]	(0,10]	(170,180]
186354	West	-4.61654826102548	48.3392065441234	7.66340327246763	5.82146187022804	195.599213697694	(7.6,7.8]	(0,10]	(190,200]
186355	West	-4.61654557102548	48.3392065441234	7.67033124671304	4.81832925746243	217.802411562312	(7.6,7.8]	(0,10]	(210,220]
186356	West	-4.61654288102548	48.3392065441234	7.68613490298374	6.38823885467882	240.467236513118	(7.6,7.8]	(0,10]	(240,250]
186357	West	-4.61654019102548	48.3392065441234	7.72037448878698	5.7608799282051	232.059454097943	(7.6,7.8]	(0,10]	(230,240]
186358	West	-4.61653750102548	48.3392065441234	7.7291479944554	7.91820467899981	150.781789480023	(7.6,7.8]	(0,10]	(150,160]
186359	West	-4.61653481102548	48.3392065441234	7.69329826029969	13.0537150932778	157.019599565948	(7.6,7.8]	(10,20]	(150,160]
186360	West	-4.61653212102548	48.3392065441234	7.68342678313555	13.4135546406574	178.744304430399	(7.6,7.8]	(10,20]	(170,180]
186361	West	-4.61652943102548	48.3392065441234	7.6880793749635	12.3442616972715	194.989905665666	(7.6,7.8]	(10,20]	(190,200]
186362	West	-4.61652674102548	48.3392065441234	7.70513430842211	13.8998545768595	217.01743053025	(7.6,7.8]	(10,20]	(210,220]
186363	West	-4.61652405102548	48.3392065441234	7.74987158959837	14.7010506352572	234.350478735113	(7.6,7.8]	(10,20]	(230,240]
186364	West	-4.61652136102548	48.3392065441234	7.78043652687659	22.6001434108346	269.616661081244	(7.6,7.8]	(20,30]	(260,270]
186365	West	-4.61651867102548	48.3392065441234	7.90529761299359	42.5897913655586	287.101288584427	(7.8,8]	(40,50]	(280,290]
186372	West	-4.61649984102548	48.3392065441234	7.8818715951652	27.9419108469882	89.7201420604784	(7.8,8]	(20,30]	(80,90]
186373	West	-4.61649715102548	48.3392065441234	7.80840760738337	17.8451588925997	123.324344109567	(7.8,8]	(10,20]	(120,130]
186374	West	-4.61649446102548	48.3392065441234	7.79239888851684	16.8882653895564	154.085907009058	(7.6,7.8]	(10,20]	(150,160]
186375	West	-4.61649177102548	48.3392065441234	7.76079456577885	15.3487040205382	177.885210156056	(7.6,7.8]	(10,20]	(170,180]
186376	West	-4.61648908102548	48.3392065441234	7.80166889050773	16.3377296494397	196.517568439601	(7.8,8]	(10,20]	(190,200]
186377	West	-4.61648639102548	48.3392065441234	7.75635421069468	25.4770111264323	230.808721822843	(7.6,7.8]	(20,30]	(230,240]
186378	West	-4.61648370102548	48.3392065441234	7.89993576773453	29.6951752805286	247.099659126517	(7.8,8]	(20,30]	(240,250]
186379	West	-4.61648101102548	48.3392065441234	7.99095210054024	11.0102878507969	242.718528617835	(7.8,8]	(10,20]	(240,250]
186380	West	-4.61647832102548	48.3392065441234	7.9800361993025	10.1479952628742	229.341245722138	(7.8,8]	(10,20]	(220,230]
186393	West	-4.61644335102548	48.3392065441234	7.99858042447227	56.1967726233148	161.142029376331	(7.8,8]	(50,60]	(160,170]
186394	West	-4.61644066102548	48.3392065441234	7.84845246973917	57.6161887663771	162.702143961068	(7.8,8]	(50,60]	(160,170]
186395	West	-4.61643797102548	48.3392065441234	7.75042708568216	51.7178837161235	158.047368507629	(7.6,7.8]	(50,60]	(150,160]
186396	West	-4.61643528102548	48.3392065441234	7.62812216236658	44.6013595085919	143.113438494558	(7.6,7.8]	(40,50]	(140,150]
186397	West	-4.61643259102548	48.3392065441234	7.50019981936171	42.9074430111893	170.804824813974	(7.4,7.6]	(40,50]	(170,180]
186398	West	-4.61642990102548	48.3392065441234	7.61047089195693	53.0178660210008	190.440501879517	(7.6,7.8]	(50,60]	(190,200]
186399	West	-4.61642721102548	48.3392065441234	7.66045635135105	57.4942487482201	186.308035476354	(7.6,7.8]	(50,60]	(180,190]
186400	West	-4.61642452102548	48.3392065441234	7.6869780573885	58.8984357554803	186.335456268023	(7.6,7.8]	(50,60]	(180,190]
186401	West	-4.61642183102548	48.3392065441234	7.72375732277274	59.0895231852094	186.469650383849	(7.6,7.8]	(50,60]	(180,190]
186402	West	-4.61641914102548	48.3392065441234	7.78862381486405	60.7924477521586	178.828182948987	(7.6,7.8]	(60,70]	(170,180]
186403	West	-4.61641645102548	48.3392065441234	7.73656824396015	63.6163475968386	173.334236195619	(7.6,7.8]	(60,70]	(170,180]
186404	West	-4.61641376102548	48.3392065441234	7.7247133980938	64.5575049209817	173.976454933181	(7.6,7.8]	(60,70]	(170,180]
186405	West	-4.61641107102548	48.3392065441234	7.67629334847359	64.3438412053545	171.259042823322	(7.6,7.8]	(60,70]	(170,180]
186406	West	-4.61640838102548	48.3392065441234	7.60351948577227	63.9706667955902	165.310015207628	(7.6,7.8]	(60,70]	(160,170]
186407	West	-4.61640569102548	48.3392065441234	7.44542760190572	63.2749904463054	162.228561681303	(7.4,7.6]	(60,70]	(160,170]
186408	West	-4.61640300102548	48.3392065441234	7.27286345854052	61.5216693133633	167.871674069902	(7.2,7.4]	(60,70]	(160,170]
186409	West	-4.61640031102548	48.3392065441234	7.24041203198795	60.4948336025487	178.540478264855	(7.2,7.4]	(60,70]	(170,180]
186410	West	-4.61639762102548	48.3392065441234	7.27857587989148	61.8886101240422	182.36186139366	(7.2,7.4]	(60,70]	(180,190]
186411	West	-4.61639493102548	48.3392065441234	7.28734682690851	63.7520313477623	179.554027481153	(7.2,7.4]	(60,70]	(170,180]
186412	West	-4.61639224102548	48.3392065441234	7.27924507080961	65.581783087613	171.134757889479	(7.2,7.4]	(60,70]	(170,180]
186413	West	-4.61638955102548	48.3392065441234	7.14761257110525	67.8474303852957	149.042076858084	(7,7.2]	(60,70]	(140,150]
186414	West	-4.61638686102548	48.3392065441234	6.75400387507399	64.813708216823	137.159776535839	(6.6,6.8]	(60,70]	(130,140]
186415	West	-4.61638417102548	48.3392065441234	6.59793159732171	46.7944164228062	156.61158923388	(6.4,6.6]	(40,50]	(150,160]
186416	West	-4.61638148102548	48.3392065441234	6.64365670457573	40.6755704226067	185.733941794438	(6.6,6.8]	(40,50]	(180,190]
186417	West	-4.61637879102548	48.3392065441234	6.64970851120262	43.1906547484957	160.346532325081	(6.6,6.8]	(40,50]	(160,170]
186418	West	-4.61637610102548	48.3392065441234	6.51547096398736	44.3786284644171	137.250731421226	(6.4,6.6]	(40,50]	(130,140]
186419	West	-4.61637341102548	48.3392065441234	6.3555478312446	35.4234585079881	134.508709357615	(6.2,6.4]	(30,40]	(130,140]
186420	West	-4.61637072102548	48.3392065441234	6.27005446555954	22.8432072200188	141.883486811205	(6.2,6.4]	(20,30]	(140,150]
186421	West	-4.61636803102548	48.3392065441234	6.2327186588703	13.7186153980883	151.834345708758	(6.2,6.4]	(10,20]	(150,160]
186422	West	-4.61636534102548	48.3392065441234	6.22893738174356	12.4622862929345	163.011182154211	(6.2,6.4]	(10,20]	(160,170]
186423	West	-4.61636265102548	48.3392065441234	6.21441050206308	14.1032755769928	183.00061190853	(6.2,6.4]	(10,20]	(180,190]
186424	West	-4.61635996102548	48.3392065441234	6.22446359977981	19.2157756253279	233.300761730956	(6.2,6.4]	(10,20]	(230,240]
186425	West	-4.61635727102548	48.3392065441234	6.32815718914554	23.7471044653607	244.80036931745	(6.2,6.4]	(20,30]	(240,250]
186426	West	-4.61635458102548	48.3392065441234	6.41623803892007	18.3968339361587	208.005132243967	(6.4,6.6]	(10,20]	(200,210]
186427	West	-4.61635189102548	48.3392065441234	6.40978671367519	23.2988045767309	162.440210336196	(6.4,6.6]	(20,30]	(160,170]
186428	West	-4.61634920102548	48.3392065441234	6.34457713525155	28.4410544396697	153.542521524867	(6.2,6.4]	(20,30]	(150,160]
186429	West	-4.61634651102548	48.3392065441234	6.29187942414895	32.2187686792887	160.805030543053	(6.2,6.4]	(30,40]	(160,170]
186430	West	-4.61634382102548	48.3392065441234	6.27177717735255	37.6232185634027	167.19815605452	(6.2,6.4]	(30,40]	(160,170]
186431	West	-4.61634113102548	48.3392065441234	6.23675987747159	42.9660257163576	168.352530015208	(6.2,6.4]	(40,50]	(160,170]
186432	West	-4.61633844102548	48.3392065441234	6.17158217031824	46.5236843306407	173.943289137393	(6,6.2]	(40,50]	(170,180]
186433	West	-4.61633575102548	48.3392065441234	6.17136471576729	48.2403798404316	179.215736086183	(6,6.2]	(40,50]	(170,180]
186434	West	-4.61633306102548	48.3392065441234	6.18765509845146	48.9267732503506	171.646229966943	(6,6.2]	(40,50]	(170,180]
186435	West	-4.61633037102548	48.3392065441234	6.11501807753377	50.6665314420205	157.961208757657	(6,6.2]	(50,60]	(150,160]
186436	West	-4.61632768102548	48.3392065441234	5.99409075948225	51.024008073983	150.330281878721	(5.8,6]	(50,60]	(150,160]
186437	West	-4.61632499102548	48.3392065441234	5.86845278167086	41.9322131743356	164.377522748076	(5.8,6]	(40,50]	(160,170]
186438	West	-4.61632230102548	48.3392065441234	5.93013039815265	40.5677274992387	235.306748650042	(5.8,6]	(40,50]	(230,240]
186439	West	-4.61631961102548	48.3392065441234	6.15655240856774	44.2298117957976	255.221198348218	(6,6.2]	(40,50]	(250,260]
186440	West	-4.61631692102548	48.3392065441234	6.2662908254398	24.3362876525332	220.093121867869	(6.2,6.4]	(20,30]	(220,230]
186441	West	-4.61631423102548	48.3392065441234	6.26689553091456	28.3081031505131	180.437958588525	(6.2,6.4]	(20,30]	(180,190]
186442	West	-4.61631154102548	48.3392065441234	6.28037033779333	34.5701168746112	192.851322171279	(6.2,6.4]	(30,40]	(190,200]
186443	West	-4.61630885102548	48.3392065441234	6.33800302733037	39.401526473831	194.961389924902	(6.2,6.4]	(30,40]	(190,200]
186444	West	-4.61630616102548	48.3392065441234	6.37658426311236	42.4446239885885	194.074881289202	(6.2,6.4]	(40,50]	(190,200]
186445	West	-4.61630347102548	48.3392065441234	6.45333146789039	42.2823084362786	185.38845049918	(6.4,6.6]	(40,50]	(180,190]
186446	West	-4.61630078102548	48.3392065441234	6.43402297401439	42.7758285964669	166.32828430505	(6.4,6.6]	(40,50]	(160,170]
186447	West	-4.61629809102548	48.3392065441234	6.36843229882704	42.5178007704301	154.570469129126	(6.2,6.4]	(40,50]	(150,160]
187878	West	-4.61724228102548	48.3392047541234	7.86758575163664	28.3301791845315	228.535827787719	(7.8,8]	(20,30]	(220,230]
187885	West	-4.61722345102548	48.3392047541234	7.89331045689444	47.9646269827918	142.316791575339	(7.8,8]	(40,50]	(140,150]
187886	West	-4.61722076102548	48.3392047541234	7.795984571989	46.6236788714223	148.37258276946	(7.6,7.8]	(40,50]	(140,150]
187887	West	-4.61721807102548	48.3392047541234	7.69054895180594	50.319715190125	146.954200705596	(7.6,7.8]	(50,60]	(140,150]
187888	West	-4.61721538102548	48.3392047541234	7.54629984813287	54.8452622580464	146.803909900134	(7.4,7.6]	(50,60]	(140,150]
187889	West	-4.61721269102548	48.3392047541234	7.3957546345656	57.0932894453354	152.881847803583	(7.2,7.4]	(50,60]	(150,160]
187890	West	-4.61721000102548	48.3392047541234	7.26622482175928	57.1718727440563	157.648455857955	(7.2,7.4]	(50,60]	(150,160]
187891	West	-4.61720731102548	48.3392047541234	7.14631682609221	62.7080647213437	128.379962313445	(7,7.2]	(60,70]	(120,130]
187892	West	-4.61720462102548	48.3392047541234	6.54670732872456	63.1813951204622	113.26743236368	(6.4,6.6]	(60,70]	(110,120]
187893	West	-4.61720193102548	48.3392047541234	6.38371905614344	47.4919861006377	116.185631874196	(6.2,6.4]	(40,50]	(110,120]
187894	West	-4.61719924102548	48.3392047541234	6.21832521426585	52.2146928424787	117.147695803545	(6.2,6.4]	(50,60]	(110,120]
187895	West	-4.61719655102548	48.3392047541234	5.95006612538586	62.5921763110353	129.024520820147	(5.8,6]	(60,70]	(120,130]
187896	West	-4.61719386102548	48.3392047541234	5.69570050435606	66.6804398265761	137.842714725077	(5.6,5.8]	(60,70]	(130,140]
187897	West	-4.61719117102548	48.3392047541234	5.32699839999941	57.9229275914654	143.873281844995	(5.2,5.4]	(50,60]	(140,150]
187898	West	-4.61718848102548	48.3392047541234	5.26224753153421	42.1982915014074	257.409600411422	(5.2,5.4]	(40,50]	(250,260]
187899	West	-4.61718579102548	48.3392047541234	5.66402395485818	74.5373092606302	280.815243509854	(5.6,5.8]	(70,80]	(280,290]
187900	West	-4.61718310102548	48.3392047541234	6.68511555505801	76.9740855031757	282.303502730658	(6.6,6.8]	(70,80]	(280,290]
187901	West	-4.61718041102548	48.3392047541234	7.40204842178657	66.8317297580724	287.09316044002	(7.4,7.6]	(60,70]	(280,290]
187902	West	-4.61717772102548	48.3392047541234	7.63084068992392	31.2158639527147	297.0580588707	(7.6,7.8]	(30,40]	(290,300]
187903	West	-4.61717503102548	48.3392047541234	7.61840437559754	12.6470472492666	274.83905478977	(7.6,7.8]	(10,20]	(270,280]
187904	West	-4.61717234102548	48.3392047541234	7.7028469590435	44.3658733454202	278.601681649732	(7.6,7.8]	(40,50]	(270,280]
187905	West	-4.61716965102548	48.3392047541234	7.99105300936554	59.7359480903149	283.976499026942	(7.8,8]	(50,60]	(280,290]
187916	West	-4.61714006102548	48.3392047541234	7.95486379435069	11.0913497949053	260.735180833306	(7.8,8]	(10,20]	(260,270]
187941	West	-4.61707281102548	48.3392047541234	6.85668145203524	11.1449265892957	259.928883342084	(6.8,7]	(10,20]	(250,260]
187942	West	-4.61707012102548	48.3392047541234	6.88622159790717	7.26287424290643	270.758904350568	(6.8,7]	(0,10]	(270,280]
187943	West	-4.61706743102548	48.3392047541234	6.90628027321969	5.30343820339313	275.257682763025	(6.8,7]	(0,10]	(270,280]
187944	West	-4.61706474102548	48.3392047541234	6.92096789470231	4.8398575013094	265.555183337947	(6.8,7]	(0,10]	(260,270]
187945	West	-4.61706205102548	48.3392047541234	6.93482435860424	5.46846638644689	250.078125451864	(6.8,7]	(0,10]	(250,260]
187946	West	-4.61705936102548	48.3392047541234	6.95420627535966	7.30414410438197	232.106895824958	(6.8,7]	(0,10]	(230,240]
187957	West	-4.61702977102548	48.3392047541234	7.67331202135359	37.0372457133551	168.010279880352	(7.6,7.8]	(30,40]	(160,170]
187958	West	-4.61702708102548	48.3392047541234	7.62373662670569	40.5339630176792	160.369076855309	(7.6,7.8]	(40,50]	(160,170]
187959	West	-4.61702439102548	48.3392047541234	7.53063420166007	40.9507614310416	151.541032474361	(7.4,7.6]	(40,50]	(150,160]
187960	West	-4.61702170102548	48.3392047541234	7.46761706595986	37.4828551645634	155.746201826879	(7.4,7.6]	(30,40]	(150,160]
187961	West	-4.61701901102548	48.3392047541234	7.41850873649672	37.217439246211	156.891415244875	(7.4,7.6]	(30,40]	(150,160]
187962	West	-4.61701632102548	48.3392047541234	7.34265354991831	38.719506228803	152.72297299373	(7.2,7.4]	(30,40]	(150,160]
187963	West	-4.61701363102548	48.3392047541234	7.26707145232211	37.2436953927173	154.093201858437	(7.2,7.4]	(30,40]	(150,160]
187964	West	-4.61701094102548	48.3392047541234	7.21905000410418	35.8987353664656	159.019884433066	(7.2,7.4]	(30,40]	(150,160]
187965	West	-4.61700825102548	48.3392047541234	7.17094934889145	38.438421457548	162.47603936372	(7,7.2]	(30,40]	(160,170]
187966	West	-4.61700556102548	48.3392047541234	7.11814514074525	41.4277023966636	167.500665022255	(7,7.2]	(40,50]	(160,170]
187967	West	-4.61700287102548	48.3392047541234	7.08931201716411	42.1783956589282	167.135884897615	(7,7.2]	(40,50]	(160,170]
187968	West	-4.61700018102548	48.3392047541234	7.04518412104394	41.801201450031	160.847344785475	(7,7.2]	(40,50]	(160,170]
187969	West	-4.61699749102548	48.3392047541234	6.97205914651717	41.6849298213966	157.141399320977	(6.8,7]	(40,50]	(150,160]
187970	West	-4.61699480102548	48.3392047541234	6.91097433878698	42.1511492304405	154.64475073257	(6.8,7]	(40,50]	(150,160]
187971	West	-4.61699211102548	48.3392047541234	6.82904035009691	42.7845617101769	154.411253229946	(6.8,7]	(40,50]	(150,160]
187972	West	-4.61698942102548	48.3392047541234	6.74748028642938	43.3931643936507	158.340307085626	(6.6,6.8]	(40,50]	(150,160]
187973	West	-4.61698673102548	48.3392047541234	6.6812881334663	44.1793238426475	161.470296197139	(6.6,6.8]	(40,50]	(160,170]
187974	West	-4.61698404102548	48.3392047541234	6.61616543196624	45.1182437329736	162.187068376061	(6.6,6.8]	(40,50]	(160,170]
187975	West	-4.61698135102548	48.3392047541234	6.55608837941288	46.8796704863401	161.593281177845	(6.4,6.6]	(40,50]	(160,170]
187976	West	-4.61697866102548	48.3392047541234	6.48118156323542	48.2384454604788	160.344685408568	(6.4,6.6]	(40,50]	(160,170]
187977	West	-4.61697597102548	48.3392047541234	6.40280525504498	45.9976624854966	161.637450851155	(6.4,6.6]	(40,50]	(160,170]
187978	West	-4.61697328102548	48.3392047541234	6.35132486149995	41.1128239499538	161.983128636123	(6.2,6.4]	(40,50]	(160,170]
187979	West	-4.61697059102548	48.3392047541234	6.30482438371173	38.0978657526838	157.537548241843	(6.2,6.4]	(30,40]	(150,160]
187980	West	-4.61696790102548	48.3392047541234	6.24344046872499	39.5125921238042	149.335313187389	(6.2,6.4]	(30,40]	(140,150]
187981	West	-4.61696521102548	48.3392047541234	6.13896496494097	39.5189427593144	151.903489692057	(6,6.2]	(30,40]	(150,160]
187982	West	-4.61696252102548	48.3392047541234	6.07437945203759	28.4962095570071	171.520561628733	(6,6.2]	(20,30]	(170,180]
187983	West	-4.61695983102548	48.3392047541234	6.03913744760243	19.9823310110352	269.185776935781	(6,6.2]	(10,20]	(260,270]
187984	West	-4.61695714102548	48.3392047541234	6.15289531871074	44.1515081061724	305.02142349064	(6,6.2]	(40,50]	(300,310]
187985	West	-4.61695445102548	48.3392047541234	6.41219980168774	48.5393129734514	313.500260550655	(6.4,6.6]	(40,50]	(310,320]
187986	West	-4.61695176102548	48.3392047541234	6.58352170083756	41.8454980892337	309.987003463852	(6.4,6.6]	(40,50]	(300,310]
187987	West	-4.61694907102548	48.3392047541234	6.72632868241863	26.6831215952087	285.919030086701	(6.6,6.8]	(20,30]	(280,290]
187988	West	-4.61694638102548	48.3392047541234	6.76386019573198	18.4514102457212	216.277381889076	(6.6,6.8]	(10,20]	(210,220]
187989	West	-4.61694369102548	48.3392047541234	6.76361415982124	29.3683221502668	193.248625289096	(6.6,6.8]	(20,30]	(190,200]
187990	West	-4.61694100102548	48.3392047541234	6.77910622859036	42.4818922305155	220.392159005021	(6.6,6.8]	(40,50]	(220,230]
187991	West	-4.61693831102548	48.3392047541234	7.08559908531019	46.4403538866229	232.005572143617	(7,7.2]	(40,50]	(230,240]
187992	West	-4.61693562102548	48.3392047541234	7.16536825531288	27.0932276890454	201.345762803266	(7,7.2]	(20,30]	(200,210]
187993	West	-4.61693293102548	48.3392047541234	7.1025040170851	22.2076568963365	157.180266504941	(7,7.2]	(20,30]	(150,160]
187994	West	-4.61693024102548	48.3392047541234	7.07877063605437	19.8822779193427	180.439613502633	(7,7.2]	(10,20]	(180,190]
187995	West	-4.61692755102548	48.3392047541234	7.12467784396275	23.6544213656682	169.000416222936	(7,7.2]	(20,30]	(160,170]
187996	West	-4.61692486102548	48.3392047541234	7.07278300270006	32.3259914605779	154.531849848667	(7,7.2]	(30,40]	(150,160]
187997	West	-4.61692217102548	48.3392047541234	7.00561829999354	36.4162046120228	164.665290198088	(7,7.2]	(30,40]	(160,170]
187998	West	-4.61691948102548	48.3392047541234	6.9824831039958	40.8843222351951	175.283657137966	(6.8,7]	(40,50]	(170,180]
187999	West	-4.61691679102548	48.3392047541234	6.98285383003878	46.7661125870111	180.825484127518	(6.8,7]	(40,50]	(180,190]
188000	West	-4.61691410102548	48.3392047541234	6.96946126902113	51.4563552283771	186.396792859812	(6.8,7]	(50,60]	(180,190]
188001	West	-4.61691141102548	48.3392047541234	6.98640982994283	53.3931815806365	185.581321917853	(6.8,7]	(50,60]	(180,190]
188002	West	-4.61690872102548	48.3392047541234	6.99077567650306	54.3127247132526	179.237450689571	(6.8,7]	(50,60]	(170,180]
188003	West	-4.61690603102548	48.3392047541234	6.98726335568203	54.7907834641768	174.73341402974	(6.8,7]	(50,60]	(170,180]
188004	West	-4.61690334102548	48.3392047541234	6.96242999550108	53.8771917909225	171.519950094945	(6.8,7]	(50,60]	(170,180]
188005	West	-4.61690065102548	48.3392047541234	6.91453646433646	52.5622156507856	169.02443311082	(6.8,7]	(50,60]	(160,170]
188006	West	-4.61689796102548	48.3392047541234	6.85776548089672	50.7679805309055	166.990551204812	(6.8,7]	(50,60]	(160,170]
188007	West	-4.61689527102548	48.3392047541234	6.80378693074435	48.197538705457	163.024699478689	(6.8,7]	(40,50]	(160,170]
188008	West	-4.61689258102548	48.3392047541234	6.72693328589683	44.9397103207456	160.202052786365	(6.6,6.8]	(40,50]	(160,170]
188009	West	-4.61688989102548	48.3392047541234	6.65987321596731	42.0355476659251	162.646759420347	(6.6,6.8]	(40,50]	(160,170]
188010	West	-4.61688720102548	48.3392047541234	6.64538873145573	44.956750907203	155.630789118811	(6.6,6.8]	(40,50]	(150,160]
188011	West	-4.61688451102548	48.3392047541234	6.51782419968209	53.3198693889351	155.676874678853	(6.4,6.6]	(50,60]	(150,160]
188012	West	-4.61688182102548	48.3392047541234	6.31605104566725	60.4490242291412	175.111323881606	(6.2,6.4]	(60,70]	(170,180]
188013	West	-4.61687913102548	48.3392047541234	6.38890840210557	64.1363206062724	182.99933394193	(6.2,6.4]	(60,70]	(180,190]
188014	West	-4.61687644102548	48.3392047541234	6.40344244405013	63.1018614332544	178.591901947985	(6.4,6.6]	(60,70]	(170,180]
188015	West	-4.61687375102548	48.3392047541234	6.39864365425797	60.2755214383339	175.968735856008	(6.2,6.4]	(60,70]	(170,180]
188016	West	-4.61687106102548	48.3392047541234	6.36015228677643	57.5123280877862	172.015213806153	(6.2,6.4]	(50,60]	(170,180]
188017	West	-4.61686837102548	48.3392047541234	6.28089753356631	54.0149371459836	164.998920781027	(6.2,6.4]	(50,60]	(160,170]
188018	West	-4.61686568102548	48.3392047541234	6.21513898413663	48.5022223400991	177.001289261959	(6.2,6.4]	(40,50]	(170,180]
188019	West	-4.61686299102548	48.3392047541234	6.25818502376424	49.2722977770862	190.117295020803	(6.2,6.4]	(40,50]	(190,200]
188020	West	-4.61686030102548	48.3392047541234	6.27564860681967	50.226235740313	182.029749030956	(6.2,6.4]	(50,60]	(180,190]
188021	West	-4.61685761102548	48.3392047541234	6.260452820771	48.0520696860836	183.949144683024	(6.2,6.4]	(40,50]	(180,190]
188022	West	-4.61685492102548	48.3392047541234	6.32937267438668	45.2235717118372	196.344580946502	(6.2,6.4]	(40,50]	(190,200]
188023	West	-4.61685223102548	48.3392047541234	6.43416831178935	44.1942306900326	204.119689982658	(6.4,6.6]	(40,50]	(200,210]
188024	West	-4.61684954102548	48.3392047541234	6.54298793231173	43.8173432930149	203.886085708854	(6.4,6.6]	(40,50]	(200,210]
188025	West	-4.61684685102548	48.3392047541234	6.62256504650944	43.4194641882459	198.796236383911	(6.6,6.8]	(40,50]	(190,200]
188026	West	-4.61684416102548	48.3392047541234	6.67178904284708	44.1524649269997	191.264134656503	(6.6,6.8]	(40,50]	(190,200]
188027	West	-4.61684147102548	48.3392047541234	6.69154257388875	46.5482625821005	182.391019775726	(6.6,6.8]	(40,50]	(180,190]
188028	West	-4.61683878102548	48.3392047541234	6.66581935613124	48.3910064491931	177.003091904922	(6.6,6.8]	(40,50]	(170,180]
188029	West	-4.61683609102548	48.3392047541234	6.64660031930429	48.9433325568395	179.998350104098	(6.6,6.8]	(40,50]	(170,180]
188030	West	-4.61683340102548	48.3392047541234	6.6406994761461	51.8110264282791	183.508288908648	(6.6,6.8]	(50,60]	(180,190]
188031	West	-4.61683071102548	48.3392047541234	6.61866459209749	54.1255539393917	171.786319797932	(6.6,6.8]	(50,60]	(170,180]
188032	West	-4.61682802102548	48.3392047541234	6.54962912454638	53.6953832776545	156.949023274388	(6.4,6.6]	(50,60]	(150,160]
188033	West	-4.61682533102548	48.3392047541234	6.43852788951934	52.0863546018286	151.521251566332	(6.4,6.6]	(50,60]	(150,160]
188034	West	-4.61682264102548	48.3392047541234	6.34536659078825	54.3909841473987	161.162204256998	(6.2,6.4]	(50,60]	(160,170]
188035	West	-4.61681995102548	48.3392047541234	6.27678794450355	62.3906745585699	173.812383700611	(6.2,6.4]	(60,70]	(170,180]
188036	West	-4.61681726102548	48.3392047541234	6.25028730178435	67.7597076645162	180.475948462756	(6.2,6.4]	(60,70]	(180,190]
188037	West	-4.61681457102548	48.3392047541234	6.240733649723	68.65314219837	187.536602817135	(6.2,6.4]	(60,70]	(180,190]
188038	West	-4.61681188102548	48.3392047541234	6.30041556610351	66.551161376189	181.853035487068	(6.2,6.4]	(60,70]	(180,190]
188039	West	-4.61680919102548	48.3392047541234	6.206865025646	64.5841362504433	164.109142183532	(6.2,6.4]	(60,70]	(160,170]
188040	West	-4.61680650102548	48.3392047541234	6.02735621882109	63.5553650079404	151.739686559784	(6,6.2]	(60,70]	(150,160]
188041	West	-4.61680381102548	48.3392047541234	5.71110120517211	57.8199376423305	133.982510229516	(5.6,5.8]	(50,60]	(130,140]
188042	West	-4.61680112102548	48.3392047541234	5.56150232286152	34.2135459027475	83.3362017563319	(5.4,5.6]	(30,40]	(80,90]
188043	West	-4.61679843102548	48.3392047541234	5.5698553672302	40.4583595539819	358.995058542657	(5.4,5.6]	(40,50]	(350,360]
188044	West	-4.61679574102548	48.3392047541234	5.62020542741601	42.2759291633731	3.66675486981236	(5.6,5.8]	(40,50]	(0,10]
188045	West	-4.61679305102548	48.3392047541234	5.58946776760969	39.6891016704972	40.006271865265	(5.4,5.6]	(30,40]	(40,50]
188046	West	-4.61679036102548	48.3392047541234	5.4513087605322	32.636165422877	59.183803741896	(5.4,5.6]	(30,40]	(50,60]
188047	West	-4.61678767102548	48.3392047541234	5.38392408019251	17.7448420685343	22.9420049276594	(5.2,5.4]	(10,20]	(20,30]
188048	West	-4.61678498102548	48.3392047541234	5.39460286732456	25.6436700486193	344.467879776568	(5.2,5.4]	(20,30]	(340,350]
188049	West	-4.61678229102548	48.3392047541234	5.4512494648653	28.8028840788202	349.453920112786	(5.4,5.6]	(20,30]	(340,350]
188050	West	-4.61677960102548	48.3392047541234	5.47565655669736	29.9045198914067	314.89903420396	(5.4,5.6]	(20,30]	(310,320]
188051	West	-4.61677691102548	48.3392047541234	5.66247465994047	26.6069436494871	297.146587380386	(5.6,5.8]	(20,30]	(290,300]
188052	West	-4.61677422102548	48.3392047541234	5.61923986022289	17.9442519515332	345.254326899354	(5.6,5.8]	(10,20]	(340,350]
188053	West	-4.61677153102548	48.3392047541234	5.53974574104083	38.2055344226821	311.636711996309	(5.4,5.6]	(30,40]	(310,320]
188054	West	-4.61676884102548	48.3392047541234	5.90562109185592	47.6611024866984	293.606090480629	(5.8,6]	(40,50]	(290,300]
188055	West	-4.61676615102548	48.3392047541234	6.08727763458192	29.5721289895871	271.718299575015	(6,6.2]	(20,30]	(270,280]
188056	West	-4.61676346102548	48.3392047541234	6.08648443772548	29.1237738057805	222.322425493409	(6,6.2]	(20,30]	(220,230]
188057	West	-4.61676077102548	48.3392047541234	6.17571374239674	47.6906049286492	242.685648773147	(6,6.2]	(40,50]	(240,250]
188058	West	-4.61675808102548	48.3392047541234	6.48829393062704	55.5152815809765	260.616103100968	(6.4,6.6]	(50,60]	(260,270]
188059	West	-4.61675539102548	48.3392047541234	6.80665896026966	42.815131286261	269.294325464089	(6.8,7]	(40,50]	(260,270]
188060	West	-4.61675270102548	48.3392047541234	6.90396860409418	18.4712022224489	275.926774290001	(6.8,7]	(10,20]	(270,280]
188061	West	-4.61675001102548	48.3392047541234	6.98410840243713	14.2451656594335	297.606208285554	(6.8,7]	(10,20]	(290,300]
188062	West	-4.61674732102548	48.3392047541234	7.04866735603844	16.6441831176273	330.491506380804	(7,7.2]	(10,20]	(330,340]
188063	West	-4.61674463102548	48.3392047541234	7.06777109308464	21.7309555097819	350.19337762453	(7,7.2]	(20,30]	(350,360]
188064	West	-4.61674194102548	48.3392047541234	7.07164191839249	27.3248507127354	352.79898579892	(7,7.2]	(20,30]	(350,360]
188065	West	-4.61673925102548	48.3392047541234	7.08332201225013	32.7105944022592	343.989523173958	(7,7.2]	(30,40]	(340,350]
188066	West	-4.61673656102548	48.3392047541234	7.13586074366825	33.9875020303826	329.017166990375	(7,7.2]	(30,40]	(320,330]
188067	West	-4.61673387102548	48.3392047541234	7.19718643396812	49.429479824605	281.046715087585	(7,7.2]	(40,50]	(280,290]
188068	West	-4.61673118102548	48.3392047541234	7.58174267223415	64.6486976241285	263.732005088092	(7.4,7.6]	(60,70]	(260,270]
188096	West	-4.61665586102548	48.3392047541234	7.98002918328148	32.5625820424846	50.1964572058075	(7.8,8]	(30,40]	(50,60]
188097	West	-4.61665317102548	48.3392047541234	7.89003330361128	20.8537426302493	79.6665621943723	(7.8,8]	(20,30]	(70,80]
188098	West	-4.61665048102548	48.3392047541234	7.8570991826554	17.0520947830889	135.005256331066	(7.8,8]	(10,20]	(130,140]
188099	West	-4.61664779102548	48.3392047541234	7.81955900261681	22.5089692279461	153.278988012801	(7.8,8]	(20,30]	(150,160]
188100	West	-4.61664510102548	48.3392047541234	7.77807697226624	29.1322758014134	157.70795074734	(7.6,7.8]	(20,30]	(150,160]
188101	West	-4.61664241102548	48.3392047541234	7.74789034107891	34.8390098338535	172.178989434178	(7.6,7.8]	(30,40]	(170,180]
188102	West	-4.61663972102548	48.3392047541234	7.74834298817386	36.8534436477682	177.843141730243	(7.6,7.8]	(30,40]	(170,180]
188103	West	-4.61663703102548	48.3392047541234	7.75319921994966	36.321680775202	184.333024321077	(7.6,7.8]	(30,40]	(180,190]
188104	West	-4.61663434102548	48.3392047541234	7.81950867402236	37.1634261954959	182.693919033245	(7.8,8]	(30,40]	(180,190]
188105	West	-4.61663165102548	48.3392047541234	7.77598344687097	32.8168393849128	172.070936952243	(7.6,7.8]	(30,40]	(170,180]
188106	West	-4.61662896102548	48.3392047541234	7.66435061319573	20.3459328756348	239.260422014691	(7.6,7.8]	(20,30]	(230,240]
188107	West	-4.61662627102548	48.3392047541234	7.91425516728262	45.7177255077921	286.040275369897	(7.8,8]	(40,50]	(280,290]
188135	West	-4.61655095102548	48.3392047541234	7.63765013232792	8.14078908686422	190.497111757374	(7.6,7.8]	(0,10]	(190,200]
188136	West	-4.61654826102548	48.3392047541234	7.65334823967916	6.70561976982558	207.532065589716	(7.6,7.8]	(0,10]	(200,210]
188137	West	-4.61654557102548	48.3392047541234	7.66842363039157	7.1549807359077	199.692869065562	(7.6,7.8]	(0,10]	(190,200]
188138	West	-4.61654288102548	48.3392047541234	7.67936438224798	11.5691010975471	189.877825945705	(7.6,7.8]	(10,20]	(180,190]
188139	West	-4.61654019102548	48.3392047541234	7.69736908910452	17.8506894870737	182.803550018805	(7.6,7.8]	(10,20]	(180,190]
188140	West	-4.61653750102548	48.3392047541234	7.69285525764442	20.7153306426023	163.938789867132	(7.6,7.8]	(20,30]	(160,170]
188141	West	-4.61653481102548	48.3392047541234	7.6302383378733	17.5196516187629	164.19215839687	(7.6,7.8]	(10,20]	(160,170]
188142	West	-4.61653212102548	48.3392047541234	7.63376511231156	13.3162855320709	188.410014301431	(7.6,7.8]	(10,20]	(180,190]
188143	West	-4.61652943102548	48.3392047541234	7.64426553394859	12.3415410308206	198.798864795676	(7.6,7.8]	(10,20]	(190,200]
188144	West	-4.61652674102548	48.3392047541234	7.66555511131576	14.1518286960559	221.291293612688	(7.6,7.8]	(10,20]	(220,230]
188145	West	-4.61652405102548	48.3392047541234	7.70359949004083	20.1524517665614	259.248946862137	(7.6,7.8]	(20,30]	(250,260]
188146	West	-4.61652136102548	48.3392047541234	7.79287700046198	32.4599967614635	282.336921606675	(7.6,7.8]	(30,40]	(280,290]
188147	West	-4.61651867102548	48.3392047541234	7.96557518894465	43.9216638510591	278.557038005485	(7.8,8]	(40,50]	(270,280]
188154	West	-4.61649984102548	48.3392047541234	7.89816977473992	36.0534636297554	86.6433688048717	(7.8,8]	(30,40]	(80,90]
188155	West	-4.61649715102548	48.3392047541234	7.74420034840543	22.3801483732643	104.800474581707	(7.6,7.8]	(20,30]	(100,110]
188156	West	-4.61649446102548	48.3392047541234	7.70268703558475	8.95606194040724	136.541367817469	(7.6,7.8]	(0,10]	(130,140]
188157	West	-4.61649177102548	48.3392047541234	7.68078164677594	7.1867978401415	161.224442262042	(7.6,7.8]	(0,10]	(160,170]
188158	West	-4.61648908102548	48.3392047541234	7.6897759827961	9.50766009816007	208.111905660361	(7.6,7.8]	(0,10]	(200,210]
188159	West	-4.61648639102548	48.3392047541234	7.74181647009077	23.7542033096355	261.388107445544	(7.6,7.8]	(20,30]	(260,270]
188160	West	-4.61648370102548	48.3392047541234	7.87942318786662	32.6112033689387	273.160445366577	(7.8,8]	(30,40]	(270,280]
188161	West	-4.61648101102548	48.3392047541234	7.99429400885762	13.1599523422828	286.859377932672	(7.8,8]	(10,20]	(280,290]
188162	West	-4.61647832102548	48.3392047541234	7.97328132375907	4.83179338489699	319.861879183113	(7.8,8]	(0,10]	(310,320]
188168	West	-4.61646218102548	48.3392047541234	7.92614222614444	49.9669290333779	161.231259884826	(7.8,8]	(40,50]	(160,170]
188169	West	-4.61645949102548	48.3392047541234	7.90050425184499	49.4977687583136	181.013666226538	(7.8,8]	(40,50]	(180,190]
188170	West	-4.61645680102548	48.3392047541234	7.901579072192	47.0532156960474	192.049745822176	(7.8,8]	(40,50]	(190,200]
188171	West	-4.61645411102548	48.3392047541234	7.98683116709158	40.3478306881759	201.721341239817	(7.8,8]	(40,50]	(200,210]
188173	West	-4.61644873102548	48.3392047541234	7.99416921175071	46.6432673959459	139.852308767477	(7.8,8]	(40,50]	(130,140]
188174	West	-4.61644604102548	48.3392047541234	7.78377372675758	56.419940392591	150.020802750953	(7.6,7.8]	(50,60]	(150,160]
188175	West	-4.61644335102548	48.3392047541234	7.66111912266201	58.5194823386081	159.18189124395	(7.6,7.8]	(50,60]	(150,160]
188176	West	-4.61644066102548	48.3392047541234	7.53890234718527	52.5635721301982	170.110429213635	(7.4,7.6]	(50,60]	(170,180]
188177	West	-4.61643797102548	48.3392047541234	7.56260811627813	41.1208289757668	181.444566648816	(7.4,7.6]	(40,50]	(180,190]
188178	West	-4.61643528102548	48.3392047541234	7.61695326343673	34.2563746904047	145.018057221891	(7.6,7.8]	(30,40]	(140,150]
188179	West	-4.61643259102548	48.3392047541234	7.41259150467554	40.923421527024	138.762392309405	(7.4,7.6]	(40,50]	(130,140]
188180	West	-4.61642990102548	48.3392047541234	7.34332793131491	52.0479855157815	165.954874416697	(7.2,7.4]	(50,60]	(160,170]
188181	West	-4.61642721102548	48.3392047541234	7.30947059488076	60.3055451442805	178.862876280852	(7.2,7.4]	(60,70]	(170,180]
188182	West	-4.61642452102548	48.3392047541234	7.33753889431689	62.0746054860515	185.437002294882	(7.2,7.4]	(60,70]	(180,190]
188183	West	-4.61642183102548	48.3392047541234	7.3889786975392	63.1561237982604	182.465121072772	(7.2,7.4]	(60,70]	(180,190]
188184	West	-4.61641914102548	48.3392047541234	7.37901568875664	65.548605834072	172.97566008904	(7.2,7.4]	(60,70]	(170,180]
188185	West	-4.61641645102548	48.3392047541234	7.25177483490644	67.5269074498906	170.175483461734	(7.2,7.4]	(60,70]	(170,180]
188186	West	-4.61641376102548	48.3392047541234	7.1824993589879	68.5863946792317	173.668885490826	(7,7.2]	(60,70]	(170,180]
188187	West	-4.61641107102548	48.3392047541234	7.14082225921508	68.9190553691984	174.050985051968	(7,7.2]	(60,70]	(170,180]
188188	West	-4.61640838102548	48.3392047541234	7.07322292057584	67.6122580934373	172.478663283697	(7,7.2]	(60,70]	(170,180]
188189	West	-4.61640569102548	48.3392047541234	6.99780666870049	63.8405874563811	170.836419873497	(6.8,7]	(60,70]	(170,180]
188190	West	-4.61640300102548	48.3392047541234	6.9524184150882	58.798261560794	172.674837327628	(6.8,7]	(50,60]	(170,180]
188191	West	-4.61640031102548	48.3392047541234	6.93375611792155	57.4761360467136	175.859690154972	(6.8,7]	(50,60]	(170,180]
188192	West	-4.61639762102548	48.3392047541234	6.89985437218388	59.7866292565283	176.434817142749	(6.8,7]	(50,60]	(170,180]
188193	West	-4.61639493102548	48.3392047541234	6.87707918489747	61.4871469202601	176.532571609387	(6.8,7]	(60,70]	(170,180]
188194	West	-4.61639224102548	48.3392047541234	6.83302972297117	61.954770169499	168.002640608636	(6.8,7]	(60,70]	(160,170]
188195	West	-4.61638955102548	48.3392047541234	6.68264726246048	62.3480685087954	149.853396900838	(6.6,6.8]	(60,70]	(140,150]
188196	West	-4.61638686102548	48.3392047541234	6.4715671004317	56.794736346187	146.791477473713	(6.4,6.6]	(50,60]	(140,150]
188197	West	-4.61638417102548	48.3392047541234	6.39498473670021	45.9809257081265	169.259088493198	(6.2,6.4]	(40,50]	(160,170]
188198	West	-4.61638148102548	48.3392047541234	6.39232594493434	45.7143535819248	178.293253295477	(6.2,6.4]	(40,50]	(170,180]
188199	West	-4.61637879102548	48.3392047541234	6.36132963636016	46.332591483608	167.527112963826	(6.2,6.4]	(40,50]	(160,170]
188200	West	-4.61637610102548	48.3392047541234	6.2964284430549	41.5466376227519	155.190274838612	(6.2,6.4]	(40,50]	(150,160]
188201	West	-4.61637341102548	48.3392047541234	6.23035501479653	29.5031095848507	151.086783359611	(6.2,6.4]	(20,30]	(150,160]
188202	West	-4.61637072102548	48.3392047541234	6.20839691924201	15.5528172843269	160.035537104851	(6.2,6.4]	(10,20]	(160,170]
188203	West	-4.61636803102548	48.3392047541234	6.20810903679134	9.48635256689757	159.056423635206	(6.2,6.4]	(0,10]	(150,160]
188204	West	-4.61636534102548	48.3392047541234	6.18781952294226	10.8316340932537	143.458237517646	(6,6.2]	(10,20]	(140,150]
188205	West	-4.61636265102548	48.3392047541234	6.14800145455402	8.71452438296314	189.687569196082	(6,6.2]	(0,10]	(180,190]
188206	West	-4.61635996102548	48.3392047541234	6.19846309554548	19.2757664425028	246.486013253931	(6,6.2]	(10,20]	(240,250]
188207	West	-4.61635727102548	48.3392047541234	6.29479008988353	20.1469309752099	228.586162240834	(6.2,6.4]	(20,30]	(220,230]
188208	West	-4.61635458102548	48.3392047541234	6.3022163026804	23.8910005963926	176.757818987859	(6.2,6.4]	(20,30]	(170,180]
188209	West	-4.61635189102548	48.3392047541234	6.27474338326732	31.3145518339912	161.064444106959	(6.2,6.4]	(30,40]	(160,170]
188210	West	-4.61634920102548	48.3392047541234	6.2406176476633	34.5490257857729	154.683190149761	(6.2,6.4]	(30,40]	(150,160]
188211	West	-4.61634651102548	48.3392047541234	6.1714905795659	38.3563265304872	153.720757152217	(6,6.2]	(30,40]	(150,160]
188212	West	-4.61634382102548	48.3392047541234	6.09018276925291	42.8663663570304	158.684051013776	(6,6.2]	(40,50]	(150,160]
188213	West	-4.61634113102548	48.3392047541234	6.02504720550655	45.1478201921918	163.765449856981	(6,6.2]	(40,50]	(160,170]
188214	West	-4.61633844102548	48.3392047541234	5.97906680033298	44.521639351443	170.67282111359	(5.8,6]	(40,50]	(170,180]
188215	West	-4.61633575102548	48.3392047541234	5.95533581847517	44.2983864232598	177.509837631601	(5.8,6]	(40,50]	(170,180]
188216	West	-4.61633306102548	48.3392047541234	5.9409587196728	44.4327285710197	171.257844523053	(5.8,6]	(40,50]	(170,180]
188217	West	-4.61633037102548	48.3392047541234	5.87666578298166	45.4747956190527	155.231090996634	(5.8,6]	(40,50]	(150,160]
188218	West	-4.61632768102548	48.3392047541234	5.77547173223114	46.015201835681	148.261050879039	(5.6,5.8]	(40,50]	(140,150]
188219	West	-4.61632499102548	48.3392047541234	5.67589515460018	38.2248622675952	179.419153250058	(5.6,5.8]	(30,40]	(170,180]
188220	West	-4.61632230102548	48.3392047541234	5.77239084680586	50.6158979756455	243.687451233322	(5.6,5.8]	(50,60]	(240,250]
188221	West	-4.61631961102548	48.3392047541234	6.1217924335988	46.6961627474862	252.614093646797	(6,6.2]	(40,50]	(250,260]
188222	West	-4.61631692102548	48.3392047541234	6.20132402831704	19.4637479266261	196.694297749454	(6.2,6.4]	(10,20]	(190,200]
188223	West	-4.61631423102548	48.3392047541234	6.15038110137293	25.3655996407215	165.623523886678	(6,6.2]	(20,30]	(160,170]
188224	West	-4.61631154102548	48.3392047541234	6.13101219594106	31.2239052340587	179.672754109745	(6,6.2]	(30,40]	(170,180]
188225	West	-4.61630885102548	48.3392047541234	6.155349988406	39.3426533091713	182.527536984449	(6,6.2]	(30,40]	(180,190]
188226	West	-4.61630616102548	48.3392047541234	6.15318834940143	46.1459740155541	184.876482266482	(6,6.2]	(40,50]	(180,190]
188227	West	-4.61630347102548	48.3392047541234	6.19354820244211	50.5606374341699	181.119908815964	(6,6.2]	(50,60]	(180,190]
188228	West	-4.61630078102548	48.3392047541234	6.17285091622398	51.4318962968892	171.899542619365	(6,6.2]	(50,60]	(170,180]
188229	West	-4.61629809102548	48.3392047541234	6.10023770598956	44.1859351326075	174.530387418136	(6,6.2]	(40,50]	(170,180]
188230	West	-4.61629540102548	48.3392047541234	6.07609627474478	26.4123052549419	178.228863219445	(6,6.2]	(20,30]	(170,180]
189659	West	-4.61724497102548	48.3392029641234	7.79332065725111	41.0950313011502	141.249558310251	(7.6,7.8]	(40,50]	(140,150]
189660	West	-4.61724228102548	48.3392029641234	7.94056394742232	39.2530332731925	255.075887888699	(7.8,8]	(30,40]	(250,260]
189666	West	-4.61722614102548	48.3392029641234	7.90677293002118	53.1209120091375	145.367249440836	(7.8,8]	(50,60]	(140,150]
189667	West	-4.61722345102548	48.3392029641234	7.76942148067042	50.8580200178479	149.65170344879	(7.6,7.8]	(50,60]	(140,150]
189668	West	-4.61722076102548	48.3392029641234	7.63796626639252	51.5899698974676	148.78319703397	(7.6,7.8]	(50,60]	(140,150]
189669	West	-4.61721807102548	48.3392029641234	7.50339974837787	55.8189655168006	146.418091212784	(7.4,7.6]	(50,60]	(140,150]
189670	West	-4.61721538102548	48.3392029641234	7.30475683799056	57.8218685421623	146.03299684345	(7.2,7.4]	(50,60]	(140,150]
189671	West	-4.61721269102548	48.3392029641234	7.0979366992922	55.2315796896737	150.302966566473	(7,7.2]	(50,60]	(150,160]
189672	West	-4.61721000102548	48.3392029641234	6.95698364461908	49.1868207936771	156.954966536817	(6.8,7]	(40,50]	(150,160]
189673	West	-4.61720731102548	48.3392029641234	6.89905255059141	49.5364827183075	122.336767055783	(6.8,7]	(40,50]	(120,130]
189674	West	-4.61720462102548	48.3392029641234	6.62809129651023	53.7536943676646	92.5289431871619	(6.6,6.8]	(50,60]	(90,100]
189675	West	-4.61720193102548	48.3392029641234	6.38759337725502	44.5523908395009	84.3925644867159	(6.2,6.4]	(40,50]	(80,90]
189676	West	-4.61719924102548	48.3392029641234	6.24164790127947	59.0517992836645	100.155182780205	(6.2,6.4]	(50,60]	(100,110]
189677	West	-4.61719655102548	48.3392029641234	5.75790803340179	68.5531056180558	113.341991319688	(5.6,5.8]	(60,70]	(110,120]
189678	West	-4.61719386102548	48.3392029641234	5.22542541361156	63.147932753808	130.681766640127	(5.2,5.4]	(60,70]	(130,140]
189679	West	-4.61719117102548	48.3392029641234	5.08716351418555	27.1474762771251	213.815598678374	(5,5.2]	(20,30]	(210,220]
189680	West	-4.61718848102548	48.3392029641234	5.30521523497123	68.00102038485	295.623316481109	(5.2,5.4]	(60,70]	(290,300]
189681	West	-4.61718579102548	48.3392029641234	5.9232136417795	77.062354660657	296.044007528454	(5.8,6]	(70,80]	(290,300]
189682	West	-4.61718310102548	48.3392029641234	6.93448883807703	75.8224655200201	291.90849031782	(6.8,7]	(70,80]	(290,300]
189683	West	-4.61718041102548	48.3392029641234	7.5149676147122	59.2855170052593	288.028731736283	(7.4,7.6]	(50,60]	(280,290]
189684	West	-4.61717772102548	48.3392029641234	7.61442166997625	10.2562866043582	240.770436937731	(7.6,7.8]	(10,20]	(240,250]
189685	West	-4.61717503102548	48.3392029641234	7.55544852854606	19.5666649561971	254.271806815672	(7.4,7.6]	(10,20]	(250,260]
189686	West	-4.61717234102548	48.3392029641234	7.69002421218929	57.2432947128649	285.911433442666	(7.6,7.8]	(50,60]	(280,290]
189698	West	-4.61714006102548	48.3392029641234	7.99074390649792	11.8903534749654	213.883575606005	(7.8,8]	(10,20]	(210,220]
189702	West	-4.61712930102548	48.3392029641234	7.95446868326312	33.2936131088165	146.761149221063	(7.8,8]	(30,40]	(140,150]
189703	West	-4.61712661102548	48.3392029641234	7.92997789158084	34.9531004697727	163.465562343805	(7.8,8]	(30,40]	(160,170]
189704	West	-4.61712392102548	48.3392029641234	7.89752437757518	36.0284208408575	156.02226916798	(7.8,8]	(30,40]	(150,160]
189705	West	-4.61712123102548	48.3392029641234	7.82351554288054	39.401054862065	146.963930123312	(7.8,8]	(30,40]	(140,150]
189722	West	-4.61707550102548	48.3392029641234	6.78540025382335	21.076327381484	258.140898531328	(6.6,6.8]	(20,30]	(250,260]
189723	West	-4.61707281102548	48.3392029641234	6.8520016823505	14.2156060847909	272.259589117209	(6.8,7]	(10,20]	(270,280]
189724	West	-4.61707012102548	48.3392029641234	6.88982378195762	8.36637995092131	288.125260441804	(6.8,7]	(0,10]	(280,290]
189725	West	-4.61706743102548	48.3392029641234	6.91194421871962	4.32855244018718	292.34934215819	(6.8,7]	(0,10]	(290,300]
189726	West	-4.61706474102548	48.3392029641234	6.92599488725615	2.57453348785321	221.043630239355	(6.8,7]	(0,10]	(220,230]
189727	West	-4.61706205102548	48.3392029641234	6.94136512013315	7.6061299396855	189.346028288382	(6.8,7]	(0,10]	(180,190]
189728	West	-4.61705936102548	48.3392029641234	6.95303651096877	13.0825707143492	186.151269089318	(6.8,7]	(10,20]	(180,190]
189729	West	-4.61705667102548	48.3392029641234	6.94725557177161	19.3035357726815	205.389529073917	(6.8,7]	(10,20]	(200,210]
189730	West	-4.61705398102548	48.3392029641234	7.02060637196244	31.1271377728417	230.626740297596	(7,7.2]	(30,40]	(230,240]
189731	West	-4.61705129102548	48.3392029641234	7.1994561123916	39.1212902648843	249.133996173147	(7,7.2]	(30,40]	(240,250]
189732	West	-4.61704860102548	48.3392029641234	7.32908127184866	43.1424986128546	270.418258412892	(7.2,7.4]	(40,50]	(270,280]
189733	West	-4.61704591102548	48.3392029641234	7.50696378871846	37.2992395999988	282.912217619315	(7.4,7.6]	(30,40]	(280,290]
189734	West	-4.61704322102548	48.3392029641234	7.59229606368204	17.6706196454106	273.897370762876	(7.4,7.6]	(10,20]	(270,280]
189735	West	-4.61704053102548	48.3392029641234	7.64101389894149	16.2401366729123	198.107913850541	(7.6,7.8]	(10,20]	(190,200]
189736	West	-4.61703784102548	48.3392029641234	7.66162833387287	33.8134903734619	168.679439508502	(7.6,7.8]	(30,40]	(160,170]
189737	West	-4.61703515102548	48.3392029641234	7.61422947662415	48.4894593225076	162.203913336	(7.6,7.8]	(40,50]	(160,170]
189738	West	-4.61703246102548	48.3392029641234	7.53444933896398	54.5684889603844	165.603267378574	(7.4,7.6]	(50,60]	(160,170]
189739	West	-4.61702977102548	48.3392029641234	7.4709216374416	54.2776129849266	173.415043720249	(7.4,7.6]	(50,60]	(170,180]
189740	West	-4.61702708102548	48.3392029641234	7.45750650722559	49.6542763048704	173.158854817236	(7.4,7.6]	(40,50]	(170,180]
189741	West	-4.61702439102548	48.3392029641234	7.38359188488625	43.6109888222235	163.80349746833	(7.2,7.4]	(40,50]	(160,170]
189742	West	-4.61702170102548	48.3392029641234	7.31929328370556	40.1526680878776	160.559315477634	(7.2,7.4]	(40,50]	(160,170]
189743	West	-4.61701901102548	48.3392029641234	7.26046762541963	40.0708366834279	157.942695395015	(7.2,7.4]	(40,50]	(150,160]
189744	West	-4.61701632102548	48.3392029641234	7.19182095795071	40.4774922153155	155.167676712388	(7,7.2]	(40,50]	(150,160]
189745	West	-4.61701363102548	48.3392029641234	7.12339166982818	40.0072977088695	157.900648967558	(7,7.2]	(40,50]	(150,160]
189746	West	-4.61701094102548	48.3392029641234	7.06967175531162	40.4942159095403	159.990336045459	(7,7.2]	(40,50]	(150,160]
189747	West	-4.61700825102548	48.3392029641234	7.00077602816115	41.8915670398969	159.005245975059	(7,7.2]	(40,50]	(150,160]
189748	West	-4.61700556102548	48.3392029641234	6.92856642919443	42.403431401593	163.93917317477	(6.8,7]	(40,50]	(160,170]
189749	West	-4.61700287102548	48.3392029641234	6.89917505185404	43.1837260561334	167.652105869396	(6.8,7]	(40,50]	(160,170]
189750	West	-4.61700018102548	48.3392029641234	6.8548612080659	43.4790237097782	164.524840203498	(6.8,7]	(40,50]	(160,170]
189751	West	-4.61699749102548	48.3392029641234	6.79952624110856	42.7996188439178	159.898191893216	(6.6,6.8]	(40,50]	(150,160]
189752	West	-4.61699480102548	48.3392029641234	6.71605128019755	43.1692618300028	155.138680155754	(6.6,6.8]	(40,50]	(150,160]
189753	West	-4.61699211102548	48.3392029641234	6.63354461603556	44.3726033934179	153.614434640115	(6.6,6.8]	(40,50]	(150,160]
189754	West	-4.61698942102548	48.3392029641234	6.54839394137248	44.64188072368	156.814528401103	(6.4,6.6]	(40,50]	(150,160]
189755	West	-4.61698673102548	48.3392029641234	6.48155749919205	44.683681571514	160.245088565135	(6.4,6.6]	(40,50]	(160,170]
189756	West	-4.61698404102548	48.3392029641234	6.42192053562448	45.3400565667503	160.442417303884	(6.4,6.6]	(40,50]	(160,170]
189757	West	-4.61698135102548	48.3392029641234	6.34668168073854	46.3174612726997	158.529015285105	(6.2,6.4]	(40,50]	(150,160]
189758	West	-4.61697866102548	48.3392029641234	6.25862588901803	46.077982771819	159.22465855644	(6.2,6.4]	(40,50]	(150,160]
189759	West	-4.61697597102548	48.3392029641234	6.19701185412369	43.4917688009555	166.827878078315	(6,6.2]	(40,50]	(160,170]
189760	West	-4.61697328102548	48.3392029641234	6.18876559797577	41.6649981423881	168.543850229394	(6,6.2]	(40,50]	(160,170]
189761	West	-4.61697059102548	48.3392029641234	6.14101649646131	41.8095670721708	162.501386527498	(6,6.2]	(40,50]	(160,170]
189762	West	-4.61696790102548	48.3392029641234	6.08063451867466	44.0567599067197	152.737702433342	(6,6.2]	(40,50]	(150,160]
189763	West	-4.61696521102548	48.3392029641234	5.96149951904718	36.1904807340634	162.335862539774	(5.8,6]	(30,40]	(160,170]
189764	West	-4.61696252102548	48.3392029641234	5.9363799269636	28.8387159948417	260.128844511184	(5.8,6]	(20,30]	(260,270]
189765	West	-4.61695983102548	48.3392029641234	6.1526096053751	48.0578038641479	301.762562591025	(6,6.2]	(40,50]	(300,310]
189766	West	-4.61695714102548	48.3392029641234	6.4133399359971	48.6427591812889	308.385288523414	(6.4,6.6]	(40,50]	(300,310]
189767	West	-4.61695445102548	48.3392029641234	6.59174198678119	35.25941002314	300.940324001651	(6.4,6.6]	(30,40]	(300,310]
189768	West	-4.61695176102548	48.3392029641234	6.6329713741047	17.2659776388715	264.94105409106	(6.6,6.8]	(10,20]	(260,270]
189769	West	-4.61694907102548	48.3392029641234	6.66613443546034	19.9779551478468	196.989825848217	(6.6,6.8]	(10,20]	(190,200]
189770	West	-4.61694638102548	48.3392029641234	6.64874847754821	28.8352503085854	176.78131934723	(6.6,6.8]	(20,30]	(170,180]
189771	West	-4.61694369102548	48.3392029641234	6.65263858081003	34.337154701448	175.743045118088	(6.6,6.8]	(30,40]	(170,180]
189772	West	-4.61694100102548	48.3392029641234	6.64886375901042	46.2851684189075	197.104959414315	(6.6,6.8]	(40,50]	(190,200]
189773	West	-4.61693831102548	48.3392029641234	6.77194222923719	57.4943560621024	212.38709535976	(6.6,6.8]	(50,60]	(210,220]
189774	West	-4.61693562102548	48.3392029641234	6.99330357122317	52.6632764013513	199.187273426318	(6.8,7]	(50,60]	(190,200]
189775	West	-4.61693293102548	48.3392029641234	6.96769570028034	47.2430325370901	172.629014640221	(6.8,7]	(40,50]	(170,180]
189776	West	-4.61693024102548	48.3392029641234	6.96876057195822	50.0763206961818	174.327773859683	(6.8,7]	(50,60]	(170,180]
189777	West	-4.61692755102548	48.3392029641234	6.94441434263376	54.1036221809135	171.399658477172	(6.8,7]	(50,60]	(170,180]
189778	West	-4.61692486102548	48.3392029641234	6.85741747400007	54.8473996322826	167.416270126689	(6.8,7]	(50,60]	(160,170]
189779	West	-4.61692217102548	48.3392029641234	6.78570361270532	52.8889506017398	170.610228286175	(6.6,6.8]	(50,60]	(170,180]
189780	West	-4.61691948102548	48.3392029641234	6.74256488329106	51.7627080730736	172.903984616616	(6.6,6.8]	(50,60]	(170,180]
189781	West	-4.61691679102548	48.3392029641234	6.6817631265892	52.8144459020977	173.520624075554	(6.6,6.8]	(50,60]	(170,180]
189782	West	-4.61691410102548	48.3392029641234	6.67891640435591	55.0860588693197	179.950882967793	(6.6,6.8]	(50,60]	(170,180]
189783	West	-4.61691141102548	48.3392029641234	6.73284916978308	57.5363250089354	181.542808658124	(6.6,6.8]	(50,60]	(180,190]
189784	West	-4.61690872102548	48.3392029641234	6.74540241814584	59.2286973483327	177.021358532686	(6.6,6.8]	(50,60]	(170,180]
189785	West	-4.61690603102548	48.3392029641234	6.69220596290468	59.6372439923072	176.421604349866	(6.6,6.8]	(50,60]	(170,180]
189786	West	-4.61690334102548	48.3392029641234	6.68021712244685	58.5791570385098	176.478232995612	(6.6,6.8]	(50,60]	(170,180]
189787	West	-4.61690065102548	48.3392029641234	6.63828329084915	56.5328159985239	174.316147539862	(6.6,6.8]	(50,60]	(170,180]
189788	West	-4.61689796102548	48.3392029641234	6.61040933669372	54.927011707388	172.230672401564	(6.6,6.8]	(50,60]	(170,180]
189789	West	-4.61689527102548	48.3392029641234	6.57644076206809	54.6853068821477	169.2799178659	(6.4,6.6]	(50,60]	(160,170]
189790	West	-4.61689258102548	48.3392029641234	6.53226610697729	54.449828300766	169.289570094421	(6.4,6.6]	(50,60]	(160,170]
189791	West	-4.61688989102548	48.3392029641234	6.50373173867406	54.6706218908487	168.670987959338	(6.4,6.6]	(50,60]	(160,170]
189792	West	-4.61688720102548	48.3392029641234	6.40931964368189	55.6137991203084	161.772838520884	(6.4,6.6]	(50,60]	(160,170]
189793	West	-4.61688451102548	48.3392029641234	6.26932905581765	54.2812628035647	151.754487182502	(6.2,6.4]	(50,60]	(150,160]
189794	West	-4.61688182102548	48.3392029641234	6.09830032446295	47.2295053142509	160.069093072627	(6,6.2]	(40,50]	(160,170]
189795	West	-4.61687913102548	48.3392029641234	6.05585555605418	45.2475551557803	181.898737921579	(6,6.2]	(40,50]	(180,190]
189796	West	-4.61687644102548	48.3392029641234	6.0800564444851	46.9506591215987	182.898658458555	(6,6.2]	(40,50]	(180,190]
189797	West	-4.61687375102548	48.3392029641234	6.09499871778578	45.5654907396848	182.617910091818	(6,6.2]	(40,50]	(180,190]
189798	West	-4.61687106102548	48.3392029641234	6.11485774476121	39.6166628637673	179.517296580783	(6,6.2]	(30,40]	(170,180]
189799	West	-4.61686837102548	48.3392029641234	6.10144533978135	29.3446606542448	172.345999216215	(6,6.2]	(20,30]	(170,180]
189800	West	-4.61686568102548	48.3392029641234	6.0918075502432	21.0750101230688	184.715213609982	(6,6.2]	(20,30]	(180,190]
189801	West	-4.61686299102548	48.3392029641234	6.12075733895424	21.8120249198805	193.544267817342	(6,6.2]	(20,30]	(190,200]
189802	West	-4.61686030102548	48.3392029641234	6.13852366532306	24.5475493181318	183.725588582479	(6,6.2]	(20,30]	(180,190]
189803	West	-4.61685761102548	48.3392029641234	6.16231036398663	27.9649665218335	192.849501003181	(6,6.2]	(20,30]	(190,200]
189804	West	-4.61685492102548	48.3392029641234	6.20759752637397	33.7675302634104	207.602861185945	(6.2,6.4]	(30,40]	(200,210]
189805	West	-4.61685223102548	48.3392029641234	6.26575927203443	36.8305814171345	214.996827126611	(6.2,6.4]	(30,40]	(210,220]
189806	West	-4.61684954102548	48.3392029641234	6.32209291462725	34.80507151373	219.984557484152	(6.2,6.4]	(30,40]	(210,220]
189807	West	-4.61684685102548	48.3392029641234	6.3828713766726	28.3175313922119	221.142114897987	(6.2,6.4]	(20,30]	(220,230]
189808	West	-4.61684416102548	48.3392029641234	6.42527809350136	19.4382734179393	213.568066101085	(6.4,6.6]	(10,20]	(210,220]
189809	West	-4.61684147102548	48.3392029641234	6.43107482463118	11.4144213293276	188.709966711472	(6.4,6.6]	(10,20]	(180,190]
189810	West	-4.61683878102548	48.3392029641234	6.41896988457477	4.04708130647875	192.120966787232	(6.4,6.6]	(0,10]	(190,200]
189811	West	-4.61683609102548	48.3392029641234	6.42123229261185	4.68394209263817	329.431997400527	(6.4,6.6]	(0,10]	(320,330]
189812	West	-4.61683340102548	48.3392029641234	6.43325984240712	9.80136749947462	95.895483362792	(6.4,6.6]	(0,10]	(90,100]
189813	West	-4.61683071102548	48.3392029641234	6.42625498379037	29.8267333954712	133.080055918212	(6.4,6.6]	(20,30]	(130,140]
189814	West	-4.61682802102548	48.3392029641234	6.37298968791868	43.4554676356842	143.472512185544	(6.2,6.4]	(40,50]	(140,150]
189815	West	-4.61682533102548	48.3392029641234	6.26806034268067	51.2219495524359	144.970841248608	(6.2,6.4]	(50,60]	(140,150]
189816	West	-4.61682264102548	48.3392029641234	6.10187640697289	55.1733023226535	148.656583668848	(6,6.2]	(50,60]	(140,150]
189817	West	-4.61681995102548	48.3392029641234	5.90598219908474	55.4758669551769	156.180543158148	(5.8,6]	(50,60]	(150,160]
189818	West	-4.61681726102548	48.3392029641234	5.73899562318664	49.7073293205161	180.460466441699	(5.6,5.8]	(40,50]	(180,190]
189819	West	-4.61681457102548	48.3392029641234	5.82099652991678	45.4682855218213	220.419798042984	(5.8,6]	(40,50]	(220,230]
189820	West	-4.61681188102548	48.3392029641234	6.0211138357683	28.2216345178053	218.399472174087	(6,6.2]	(20,30]	(210,220]
189821	West	-4.61680919102548	48.3392029641234	6.03310190252291	25.8490781954575	123.493248253481	(6,6.2]	(20,30]	(120,130]
189822	West	-4.61680650102548	48.3392029641234	5.93834012791145	32.2519852231647	92.1899508866209	(5.8,6]	(30,40]	(90,100]
189823	West	-4.61680381102548	48.3392029641234	5.86839863269401	29.5216497051289	31.9391537617759	(5.8,6]	(20,30]	(30,40]
189824	West	-4.61680112102548	48.3392029641234	5.92456691658893	42.7839964025482	354.157785598059	(5.8,6]	(40,50]	(350,360]
189825	West	-4.61679843102548	48.3392029641234	5.97729732548648	45.6918006556191	353.728546470535	(5.8,6]	(40,50]	(350,360]
189826	West	-4.61679574102548	48.3392029641234	5.98502474472643	41.1476455255942	19.7833487161929	(5.8,6]	(40,50]	(10,20]
189827	West	-4.61679305102548	48.3392029641234	5.84737254331996	45.003454072733	56.3483759555545	(5.8,6]	(40,50]	(50,60]
189828	West	-4.61679036102548	48.3392029641234	5.57810750295257	38.1871835725328	47.9239719619911	(5.4,5.6]	(30,40]	(40,50]
189829	West	-4.61678767102548	48.3392029641234	5.52250442956126	39.0862960770277	349.625404418369	(5.4,5.6]	(30,40]	(340,350]
189830	West	-4.61678498102548	48.3392029641234	5.60156921522664	51.2235945649932	341.181291387176	(5.6,5.8]	(50,60]	(340,350]
189831	West	-4.61678229102548	48.3392029641234	5.62433511715775	56.1719304212716	352.161181168156	(5.6,5.8]	(50,60]	(350,360]
189832	West	-4.61677960102548	48.3392029641234	5.59559182501291	56.6584545118376	352.471988785615	(5.4,5.6]	(50,60]	(350,360]
189833	West	-4.61677691102548	48.3392029641234	5.63598205302937	54.7251645402201	345.960585057423	(5.6,5.8]	(50,60]	(340,350]
189834	West	-4.61677422102548	48.3392029641234	5.76793977885811	57.2622256237838	345.089444757877	(5.6,5.8]	(50,60]	(340,350]
189835	West	-4.61677153102548	48.3392029641234	5.93030249452775	60.4358886094379	339.271774313959	(5.8,6]	(60,70]	(330,340]
189836	West	-4.61676884102548	48.3392029641234	6.01002310428687	54.3217229595373	337.690001242321	(6,6.2]	(50,60]	(330,340]
189837	West	-4.61676615102548	48.3392029641234	6.05728960328245	37.1232277457305	353.163870083768	(6,6.2]	(30,40]	(350,360]
189838	West	-4.61676346102548	48.3392029641234	6.07245292918212	22.119379191306	349.296004773795	(6,6.2]	(20,30]	(340,350]
189839	West	-4.61676077102548	48.3392029641234	6.13622064182299	43.3286664622688	278.893291141399	(6,6.2]	(40,50]	(270,280]
189840	West	-4.61675808102548	48.3392029641234	6.50614604243953	57.2652636725968	268.300480688237	(6.4,6.6]	(50,60]	(260,270]
189841	West	-4.61675539102548	48.3392029641234	6.80178732002836	42.4706283022372	258.50241578794	(6.8,7]	(40,50]	(250,260]
189842	West	-4.61675270102548	48.3392029641234	6.85410740709882	22.8865739803179	216.636585084671	(6.8,7]	(20,30]	(210,220]
189843	West	-4.61675001102548	48.3392029641234	6.89920475564074	28.667104045021	205.228354232944	(6.8,7]	(20,30]	(200,210]
189844	West	-4.61674732102548	48.3392029641234	6.94403787308128	29.9916014945119	206.852131698196	(6.8,7]	(20,30]	(200,210]
189845	West	-4.61674463102548	48.3392029641234	6.99011935211604	23.2883924529083	215.443222747113	(6.8,7]	(20,30]	(210,220]
189846	West	-4.61674194102548	48.3392029641234	7.02274030218099	14.0401924918006	230.848789760692	(7,7.2]	(10,20]	(230,240]
189847	West	-4.61673925102548	48.3392029641234	7.07340649400456	13.3350531648899	247.534672722765	(7,7.2]	(10,20]	(240,250]
189848	West	-4.61673656102548	48.3392029641234	7.13520267717158	14.9302588026504	243.898740419101	(7,7.2]	(10,20]	(240,250]
189849	West	-4.61673387102548	48.3392029641234	7.16908484580649	36.8503072300956	240.690588668702	(7,7.2]	(30,40]	(240,250]
189850	West	-4.61673118102548	48.3392029641234	7.38835385247279	61.7857905809386	242.872866890443	(7.2,7.4]	(60,70]	(240,250]
189851	West	-4.61672849102548	48.3392029641234	7.82410549868051	66.7246432232506	246.727192444508	(7.8,8]	(60,70]	(240,250]
189868	West	-4.61668276102548	48.3392029641234	7.99674427187274	20.3719729264243	169.15148080333	(7.8,8]	(20,30]	(160,170]
189869	West	-4.61668007102548	48.3392029641234	7.98017338000348	25.4135805052423	162.184828481371	(7.8,8]	(20,30]	(160,170]
189870	West	-4.61667738102548	48.3392029641234	7.93768534607727	31.1472742892341	158.300760870584	(7.8,8]	(30,40]	(150,160]
189871	West	-4.61667469102548	48.3392029641234	7.88752530036895	30.8895341910254	168.484790212447	(7.8,8]	(30,40]	(160,170]
189872	West	-4.61667200102548	48.3392029641234	7.893791635929	26.1137966254457	215.648096084791	(7.8,8]	(20,30]	(210,220]
189879	West	-4.61665317102548	48.3392029641234	7.97057689256598	39.2239553020079	65.6478663251707	(7.8,8]	(30,40]	(60,70]
189880	West	-4.61665048102548	48.3392029641234	7.80843734891738	25.6712365465442	91.6956930426997	(7.8,8]	(20,30]	(90,100]
189881	West	-4.61664779102548	48.3392029641234	7.78265876305375	16.4409922775144	126.734561128212	(7.6,7.8]	(10,20]	(120,130]
189882	West	-4.61664510102548	48.3392029641234	7.70350689019505	24.00985933904	123.175047705783	(7.6,7.8]	(20,30]	(120,130]
189883	West	-4.61664241102548	48.3392029641234	7.60637521385101	24.1328369056566	147.608913922601	(7.6,7.8]	(20,30]	(140,150]
189884	West	-4.61663972102548	48.3392029641234	7.59979579927056	27.3962831064067	171.600428406246	(7.4,7.6]	(20,30]	(170,180]
189885	West	-4.61663703102548	48.3392029641234	7.5895587658484	33.1832340604154	178.142232729223	(7.4,7.6]	(30,40]	(170,180]
189886	West	-4.61663434102548	48.3392029641234	7.57454126892247	34.6661325806387	184.365005313405	(7.4,7.6]	(30,40]	(180,190]
189887	West	-4.61663165102548	48.3392029641234	7.57433947651176	26.3591068404299	221.710965151413	(7.4,7.6]	(20,30]	(220,230]
189888	West	-4.61662896102548	48.3392029641234	7.77348379839778	36.926143751429	272.771777195767	(7.6,7.8]	(30,40]	(270,280]
189889	West	-4.61662627102548	48.3392029641234	7.93083088549721	45.7185517407323	272.087522375394	(7.8,8]	(40,50]	(270,280]
189917	West	-4.61655095102548	48.3392029641234	7.61343581666782	12.6772445457292	194.753027349527	(7.6,7.8]	(10,20]	(190,200]
189918	West	-4.61654826102548	48.3392029641234	7.62525894957562	14.6652763402045	183.477629509172	(7.6,7.8]	(10,20]	(180,190]
189919	West	-4.61654557102548	48.3392029641234	7.62997134405848	18.5845825547591	178.706059534576	(7.6,7.8]	(10,20]	(170,180]
189920	West	-4.61654288102548	48.3392029641234	7.61785549493738	21.5268399410824	172.353463919925	(7.6,7.8]	(20,30]	(170,180]
189921	West	-4.61654019102548	48.3392029641234	7.57795794326759	23.4201322038622	172.77170495078	(7.4,7.6]	(20,30]	(170,180]
189922	West	-4.61653750102548	48.3392029641234	7.57294341515678	21.2413104437997	175.031334715276	(7.4,7.6]	(20,30]	(170,180]
189923	West	-4.61653481102548	48.3392029641234	7.57268736228649	14.1731907249138	188.976261647156	(7.4,7.6]	(10,20]	(180,190]
189924	West	-4.61653212102548	48.3392029641234	7.59990837736977	9.23347775367919	216.212932656205	(7.4,7.6]	(0,10]	(210,220]
189925	West	-4.61652943102548	48.3392029641234	7.60497644936611	7.06903978405326	243.105952382594	(7.6,7.8]	(0,10]	(240,250]
189926	West	-4.61652674102548	48.3392029641234	7.62689447281953	13.4875696643496	278.987555299491	(7.6,7.8]	(10,20]	(270,280]
189927	West	-4.61652405102548	48.3392029641234	7.68947075853093	31.372257895484	289.447924251761	(7.6,7.8]	(30,40]	(280,290]
189928	West	-4.61652136102548	48.3392029641234	7.87107934819816	42.1464711518913	296.50288715896	(7.8,8]	(40,50]	(290,300]
189929	West	-4.61651867102548	48.3392029641234	7.99961080336406	41.037633360226	297.641045544207	(7.8,8]	(40,50]	(290,300]
189936	West	-4.61649984102548	48.3392029641234	7.90201335168773	40.7777340618362	106.026602224609	(7.8,8]	(40,50]	(100,110]
189937	West	-4.61649715102548	48.3392029641234	7.73700211352045	27.376268353806	118.773148531087	(7.6,7.8]	(20,30]	(110,120]
189938	West	-4.61649446102548	48.3392029641234	7.74851267400679	16.9214265521252	160.864853872417	(7.6,7.8]	(10,20]	(160,170]
189939	West	-4.61649177102548	48.3392029641234	7.73883490385188	17.5545425864761	166.433796522667	(7.6,7.8]	(10,20]	(160,170]
189940	West	-4.61648908102548	48.3392029641234	7.7004368693571	17.3258355401883	197.638197900944	(7.6,7.8]	(10,20]	(190,200]
189941	West	-4.61648639102548	48.3392029641234	7.74687100307693	32.7528087920499	253.760883439751	(7.6,7.8]	(30,40]	(250,260]
189942	West	-4.61648370102548	48.3392029641234	7.91578573112861	37.098567548587	271.536140128251	(7.8,8]	(30,40]	(270,280]
189948	West	-4.61646756102548	48.3392029641234	7.96994646163576	45.2484545049089	158.850646509138	(7.8,8]	(40,50]	(150,160]
189949	West	-4.61646487102548	48.3392029641234	7.86563831773516	50.1771440128198	153.757683487068	(7.8,8]	(50,60]	(150,160]
189950	West	-4.61646218102548	48.3392029641234	7.70439436481752	42.1239688370606	162.837914067339	(7.6,7.8]	(40,50]	(160,170]
189951	West	-4.61645949102548	48.3392029641234	7.70092287685144	32.0800620865456	189.756315802818	(7.6,7.8]	(30,40]	(180,190]
189952	West	-4.61645680102548	48.3392029641234	7.75973860701314	32.9193137896542	207.979641210535	(7.6,7.8]	(30,40]	(200,210]
189953	West	-4.61645411102548	48.3392029641234	7.87379088177677	38.3676103914419	207.44643557391	(7.8,8]	(30,40]	(200,210]
189954	West	-4.61645142102548	48.3392029641234	7.97352602275365	46.5585525452442	164.415677245104	(7.8,8]	(40,50]	(160,170]
189955	West	-4.61644873102548	48.3392029641234	7.80340523448153	59.3732923756628	142.115746225709	(7.8,8]	(50,60]	(140,150]
189956	West	-4.61644604102548	48.3392029641234	7.51582148043574	58.972605291126	145.85331288853	(7.4,7.6]	(50,60]	(140,150]
189957	West	-4.61644335102548	48.3392029641234	7.33992855520424	50.0956012016774	161.482890973045	(7.2,7.4]	(50,60]	(160,170]
189958	West	-4.61644066102548	48.3392029641234	7.32027638585613	39.2031011329055	190.038539370403	(7.2,7.4]	(30,40]	(190,200]
189959	West	-4.61643797102548	48.3392029641234	7.42785942388653	36.0659614668247	192.628062203416	(7.4,7.6]	(30,40]	(190,200]
189960	West	-4.61643528102548	48.3392029641234	7.41955041727035	43.0082254617373	157.123743522054	(7.4,7.6]	(40,50]	(150,160]
189961	West	-4.61643259102548	48.3392029641234	7.35636493110047	52.6913841358967	140.17957544778	(7.2,7.4]	(50,60]	(140,150]
189962	West	-4.61642990102548	48.3392029641234	7.07443764968455	56.4770223056874	145.209160870447	(7,7.2]	(50,60]	(140,150]
189963	West	-4.61642721102548	48.3392029641234	6.90685831206933	56.9294125641467	170.138877440363	(6.8,7]	(50,60]	(170,180]
189964	West	-4.61642452102548	48.3392029641234	6.95409268665702	59.0078403505865	184.737446372116	(6.8,7]	(50,60]	(180,190]
189965	West	-4.61642183102548	48.3392029641234	6.96920198537426	60.394840729411	177.782995323648	(6.8,7]	(60,70]	(170,180]
189966	West	-4.61641914102548	48.3392029641234	6.90482482946722	62.1263922652627	167.475613800761	(6.8,7]	(60,70]	(160,170]
189967	West	-4.61641645102548	48.3392029641234	6.80252726539704	62.7015908769398	165.15280284474	(6.8,7]	(60,70]	(160,170]
189968	West	-4.61641376102548	48.3392029641234	6.70492293554619	62.304208831686	169.453510717014	(6.6,6.8]	(60,70]	(160,170]
[truncated: 311,185 more rows]
